# Supplementary material for: Low cost, high performance processing of single particle cryo-electron microscopy data in the cloud
Source: eLife journal article supplement (doi:10.7554/elife.06664), 2015-05-08
Supplement: supp [file elife-06664-supp-v1.zip]

Archive with 6 entries (6 files):
- elife_poa_e06664_Supplementary_File_3.xlsx
- elife_poa_e06664_Supplementary_File_1.pdf
- elife_poa_e06664_Figure_2_source_data_1.txt
- elife_poa_e06664_Figure_2_figure_supplement_1.tif
- elife_poa_e06664_Figure_4_source_data_1.xlsx
- elife_poa_e06664_Supplementary_File_2.docx
