# Supplementary material for: Low cost, high performance processing of single particle cryo-electron microscopy data in the cloud
Source: eLife journal article supplement (doi:10.7554/elife.06664), 2015-05-08
Supplement: supp [file elife-06664-supp-v1.zip › elife_poa_e06664_Figure_2_source_data_1.txt]

SPOTINSTANCEPRICE	0.599800	2015-04-02T11:23:06-0500	r3.8xlarge	Linux/UNIX	ap-northeast-1a
SPOTINSTANCEPRICE	0.606400	2015-04-02T11:21:21-0500	r3.8xlarge	Linux/UNIX	ap-northeast-1a
SPOTINSTANCEPRICE	0.613300	2015-04-02T11:16:04-0500	r3.8xlarge	Linux/UNIX	ap-northeast-1a
SPOTINSTANCEPRICE	0.620500	2015-04-02T11:14:17-0500	r3.8xlarge	Linux/UNIX	ap-northeast-1a
SPOTINSTANCEPRICE	0.613300	2015-04-02T11:08:57-0500	r3.8xlarge	Linux/UNIX	ap-northeast-1a
SPOTINSTANCEPRICE	0.606400	2015-04-02T11:05:25-0500	r3.8xlarge	Linux/UNIX	ap-northeast-1a
SPOTINSTANCEPRICE	0.613300	2015-04-02T10:46:00-0500	r3.8xlarge	Linux/UNIX	ap-northeast-1a
SPOTINSTANCEPRICE	0.606400	2015-04-02T10:38:55-0500	r3.8xlarge	Linux/UNIX	ap-northeast-1a
SPOTINSTANCEPRICE	0.599800	2015-04-02T10:35:22-0500	r3.8xlarge	Linux/UNIX	ap-northeast-1a
SPOTINSTANCEPRICE	0.606400	2015-04-02T10:10:30-0500	r3.8xlarge	Linux/UNIX	ap-northeast-1a
SPOTINSTANCEPRICE	0.613300	2015-04-02T10:08:44-0500	r3.8xlarge	Linux/UNIX	ap-northeast-1a
SPOTINSTANCEPRICE	0.606400	2015-04-02T10:03:27-0500	r3.8xlarge	Linux/UNIX	ap-northeast-1a
SPOTINSTANCEPRICE	0.599800	2015-04-02T09:47:35-0500	r3.8xlarge	Linux/UNIX	ap-northeast-1a
SPOTINSTANCEPRICE	0.613300	2015-04-02T09:45:47-0500	r3.8xlarge	Linux/UNIX	ap-northeast-1a
SPOTINSTANCEPRICE	0.628100	2015-04-02T09:38:45-0500	r3.8xlarge	Linux/UNIX	ap-northeast-1a
SPOTINSTANCEPRICE	0.636100	2015-04-02T09:19:17-0500	r3.8xlarge	Linux/UNIX	ap-northeast-1a
SPOTINSTANCEPRICE	0.644400	2015-04-02T09:03:23-0500	r3.8xlarge	Linux/UNIX	ap-northeast-1a
SPOTINSTANCEPRICE	0.636100	2015-04-02T08:59:50-0500	r3.8xlarge	Linux/UNIX	ap-northeast-1a
SPOTINSTANCEPRICE	0.644400	2015-04-02T08:35:12-0500	r3.8xlarge	Linux/UNIX	ap-northeast-1a
SPOTINSTANCEPRICE	0.653100	2015-04-02T08:21:09-0500	r3.8xlarge	Linux/UNIX	ap-northeast-1a
SPOTINSTANCEPRICE	0.672000	2015-04-02T08:17:38-0500	r3.8xlarge	Linux/UNIX	ap-northeast-1a
SPOTINSTANCEPRICE	0.653100	2015-04-02T08:15:53-0500	r3.8xlarge	Linux/UNIX	ap-northeast-1a
SPOTINSTANCEPRICE	0.644400	2015-04-02T08:05:20-0500	r3.8xlarge	Linux/UNIX	ap-northeast-1a
SPOTINSTANCEPRICE	0.653100	2015-04-02T08:03:36-0500	r3.8xlarge	Linux/UNIX	ap-northeast-1a
SPOTINSTANCEPRICE	0.662300	2015-04-02T07:51:15-0500	r3.8xlarge	Linux/UNIX	ap-northeast-1a
SPOTINSTANCEPRICE	0.672000	2015-04-02T07:49:30-0500	r3.8xlarge	Linux/UNIX	ap-northeast-1a
SPOTINSTANCEPRICE	0.662300	2015-04-02T07:37:15-0500	r3.8xlarge	Linux/UNIX	ap-northeast-1a
SPOTINSTANCEPRICE	0.692900	2015-04-02T07:33:43-0500	r3.8xlarge	Linux/UNIX	ap-northeast-1a
SPOTINSTANCEPRICE	0.682200	2015-04-02T07:31:59-0500	r3.8xlarge	Linux/UNIX	ap-northeast-1a
SPOTINSTANCEPRICE	0.692900	2015-04-02T07:23:12-0500	r3.8xlarge	Linux/UNIX	ap-northeast-1a
SPOTINSTANCEPRICE	0.704300	2015-04-02T07:16:11-0500	r3.8xlarge	Linux/UNIX	ap-northeast-1a
SPOTINSTANCEPRICE	0.672000	2015-04-02T07:12:37-0500	r3.8xlarge	Linux/UNIX	ap-northeast-1a
SPOTINSTANCEPRICE	0.682200	2015-04-02T06:56:50-0500	r3.8xlarge	Linux/UNIX	ap-northeast-1a
SPOTINSTANCEPRICE	0.943600	2015-04-02T06:51:32-0500	r3.8xlarge	Linux/UNIX	ap-northeast-1a
SPOTINSTANCEPRICE	0.915900	2015-04-02T06:48:01-0500	r3.8xlarge	Linux/UNIX	ap-northeast-1a
SPOTINSTANCEPRICE	0.973900	2015-04-02T06:46:17-0500	r3.8xlarge	Linux/UNIX	ap-northeast-1a
SPOTINSTANCEPRICE	1.043600	2015-04-02T06:42:45-0500	r3.8xlarge	Linux/UNIX	ap-northeast-1a
SPOTINSTANCEPRICE	1.007000	2015-04-02T06:41:00-0500	r3.8xlarge	Linux/UNIX	ap-northeast-1a
SPOTINSTANCEPRICE	1.043600	2015-04-02T06:39:15-0500	r3.8xlarge	Linux/UNIX	ap-northeast-1a
SPOTINSTANCEPRICE	1.084000	2015-04-02T06:28:44-0500	r3.8xlarge	Linux/UNIX	ap-northeast-1a
SPOTINSTANCEPRICE	1.128900	2015-04-02T06:23:28-0500	r3.8xlarge	Linux/UNIX	ap-northeast-1a
SPOTINSTANCEPRICE	0.973900	2015-04-02T06:09:27-0500	r3.8xlarge	Linux/UNIX	ap-northeast-1a
SPOTINSTANCEPRICE	1.043600	2015-04-02T06:05:56-0500	r3.8xlarge	Linux/UNIX	ap-northeast-1a
SPOTINSTANCEPRICE	1.084000	2015-04-02T06:02:27-0500	r3.8xlarge	Linux/UNIX	ap-northeast-1a
SPOTINSTANCEPRICE	1.179300	2015-04-02T05:57:08-0500	r3.8xlarge	Linux/UNIX	ap-northeast-1a
SPOTINSTANCEPRICE	1.084000	2015-04-02T05:55:21-0500	r3.8xlarge	Linux/UNIX	ap-northeast-1a
SPOTINSTANCEPRICE	1.007000	2015-04-02T05:50:06-0500	r3.8xlarge	Linux/UNIX	ap-northeast-1a
SPOTINSTANCEPRICE	0.973900	2015-04-02T05:46:36-0500	r3.8xlarge	Linux/UNIX	ap-northeast-1a
SPOTINSTANCEPRICE	1.007000	2015-04-02T05:34:21-0500	r3.8xlarge	Linux/UNIX	ap-northeast-1a
SPOTINSTANCEPRICE	1.043600	2015-04-02T04:26:54-0500	r3.8xlarge	Linux/UNIX	ap-northeast-1a
SPOTINSTANCEPRICE	0.716300	2015-04-02T04:03:45-0500	r3.8xlarge	Linux/UNIX	ap-northeast-1a
SPOTINSTANCEPRICE	0.806200	2015-04-02T04:02:00-0500	r3.8xlarge	Linux/UNIX	ap-northeast-1a
SPOTINSTANCEPRICE	0.825000	2015-04-02T04:00:11-0500	r3.8xlarge	Linux/UNIX	ap-northeast-1a
SPOTINSTANCEPRICE	0.845200	2015-04-02T03:58:24-0500	r3.8xlarge	Linux/UNIX	ap-northeast-1a
SPOTINSTANCEPRICE	0.866900	2015-04-02T03:51:11-0500	r3.8xlarge	Linux/UNIX	ap-northeast-1a
SPOTINSTANCEPRICE	0.825000	2015-04-02T03:44:01-0500	r3.8xlarge	Linux/UNIX	ap-northeast-1a
SPOTINSTANCEPRICE	0.932600	2015-04-02T03:42:17-0500	r3.8xlarge	Linux/UNIX	ap-northeast-1a
SPOTINSTANCEPRICE	0.883000	2015-04-02T03:40:31-0500	r3.8xlarge	Linux/UNIX	ap-northeast-1a
SPOTINSTANCEPRICE	0.906800	2015-04-02T03:29:42-0500	r3.8xlarge	Linux/UNIX	ap-northeast-1a
SPOTINSTANCEPRICE	0.860900	2015-04-02T03:22:31-0500	r3.8xlarge	Linux/UNIX	ap-northeast-1a
SPOTINSTANCEPRICE	0.840400	2015-04-02T02:55:30-0500	r3.8xlarge	Linux/UNIX	ap-northeast-1a
SPOTINSTANCEPRICE	0.860900	2015-04-02T02:39:27-0500	r3.8xlarge	Linux/UNIX	ap-northeast-1a
SPOTINSTANCEPRICE	0.840400	2015-04-02T02:35:48-0500	r3.8xlarge	Linux/UNIX	ap-northeast-1a
SPOTINSTANCEPRICE	0.860900	2015-04-02T02:03:39-0500	r3.8xlarge	Linux/UNIX	ap-northeast-1a
SPOTINSTANCEPRICE	0.840400	2015-04-02T01:54:46-0500	r3.8xlarge	Linux/UNIX	ap-northeast-1a
SPOTINSTANCEPRICE	0.860900	2015-04-02T01:53:00-0500	r3.8xlarge	Linux/UNIX	ap-northeast-1a
SPOTINSTANCEPRICE	0.840400	2015-04-02T01:51:13-0500	r3.8xlarge	Linux/UNIX	ap-northeast-1a
SPOTINSTANCEPRICE	1.198500	2015-04-02T01:47:40-0500	r3.8xlarge	Linux/UNIX	ap-northeast-1a
SPOTINSTANCEPRICE	1.200000	2015-04-01T22:38:59-0500	r3.8xlarge	Linux/UNIX	ap-northeast-1a
SPOTINSTANCEPRICE	0.869600	2015-04-01T22:37:12-0500	r3.8xlarge	Linux/UNIX	ap-northeast-1a
SPOTINSTANCEPRICE	0.798100	2015-04-01T22:33:35-0500	r3.8xlarge	Linux/UNIX	ap-northeast-1a
SPOTINSTANCEPRICE	0.782900	2015-04-01T22:31:48-0500	r3.8xlarge	Linux/UNIX	ap-northeast-1a
SPOTINSTANCEPRICE	0.768600	2015-04-01T22:19:16-0500	r3.8xlarge	Linux/UNIX	ap-northeast-1a
SPOTINSTANCEPRICE	0.755100	2015-04-01T22:12:05-0500	r3.8xlarge	Linux/UNIX	ap-northeast-1a
SPOTINSTANCEPRICE	0.742300	2015-04-01T21:59:36-0500	r3.8xlarge	Linux/UNIX	ap-northeast-1a
SPOTINSTANCEPRICE	0.730200	2015-04-01T21:54:17-0500	r3.8xlarge	Linux/UNIX	ap-northeast-1a
SPOTINSTANCEPRICE	0.767200	2015-04-01T21:50:45-0500	r3.8xlarge	Linux/UNIX	ap-northeast-1a
SPOTINSTANCEPRICE	0.730200	2015-04-01T21:48:59-0500	r3.8xlarge	Linux/UNIX	ap-northeast-1a
SPOTINSTANCEPRICE	0.718700	2015-04-01T21:41:54-0500	r3.8xlarge	Linux/UNIX	ap-northeast-1a
SPOTINSTANCEPRICE	0.687700	2015-04-01T21:20:31-0500	r3.8xlarge	Linux/UNIX	ap-northeast-1a
SPOTINSTANCEPRICE	0.707900	2015-04-01T21:18:43-0500	r3.8xlarge	Linux/UNIX	ap-northeast-1a
SPOTINSTANCEPRICE	0.718700	2015-04-01T21:09:49-0500	r3.8xlarge	Linux/UNIX	ap-northeast-1a
SPOTINSTANCEPRICE	0.730200	2015-04-01T21:02:45-0500	r3.8xlarge	Linux/UNIX	ap-northeast-1a
SPOTINSTANCEPRICE	0.687700	2015-04-01T20:55:37-0500	r3.8xlarge	Linux/UNIX	ap-northeast-1a
SPOTINSTANCEPRICE	0.708700	2015-04-01T20:50:19-0500	r3.8xlarge	Linux/UNIX	ap-northeast-1a
SPOTINSTANCEPRICE	0.730300	2015-04-01T20:37:51-0500	r3.8xlarge	Linux/UNIX	ap-northeast-1a
SPOTINSTANCEPRICE	0.719200	2015-04-01T20:29:01-0500	r3.8xlarge	Linux/UNIX	ap-northeast-1a
SPOTINSTANCEPRICE	0.707900	2015-04-01T20:27:17-0500	r3.8xlarge	Linux/UNIX	ap-northeast-1a
SPOTINSTANCEPRICE	0.697500	2015-04-01T20:14:53-0500	r3.8xlarge	Linux/UNIX	ap-northeast-1a
SPOTINSTANCEPRICE	0.687700	2015-04-01T20:11:21-0500	r3.8xlarge	Linux/UNIX	ap-northeast-1a
SPOTINSTANCEPRICE	0.707900	2015-04-01T20:00:46-0500	r3.8xlarge	Linux/UNIX	ap-northeast-1a
SPOTINSTANCEPRICE	0.697500	2015-04-01T19:57:11-0500	r3.8xlarge	Linux/UNIX	ap-northeast-1a
SPOTINSTANCEPRICE	0.687700	2015-04-01T19:34:10-0500	r3.8xlarge	Linux/UNIX	ap-northeast-1a
SPOTINSTANCEPRICE	0.667300	2015-04-01T19:30:37-0500	r3.8xlarge	Linux/UNIX	ap-northeast-1a
SPOTINSTANCEPRICE	0.658600	2015-04-01T19:28:50-0500	r3.8xlarge	Linux/UNIX	ap-northeast-1a
SPOTINSTANCEPRICE	0.676500	2015-04-01T19:20:02-0500	r3.8xlarge	Linux/UNIX	ap-northeast-1a
SPOTINSTANCEPRICE	0.667300	2015-04-01T19:12:56-0500	r3.8xlarge	Linux/UNIX	ap-northeast-1a
SPOTINSTANCEPRICE	0.650200	2015-04-01T18:57:00-0500	r3.8xlarge	Linux/UNIX	ap-northeast-1a
SPOTINSTANCEPRICE	0.642300	2015-04-01T18:53:29-0500	r3.8xlarge	Linux/UNIX	ap-northeast-1a
SPOTINSTANCEPRICE	0.650200	2015-04-01T18:51:43-0500	r3.8xlarge	Linux/UNIX	ap-northeast-1a
SPOTINSTANCEPRICE	0.642300	2015-04-01T18:37:37-0500	r3.8xlarge	Linux/UNIX	ap-northeast-1a
SPOTINSTANCEPRICE	0.634700	2015-04-01T18:18:17-0500	r3.8xlarge	Linux/UNIX	ap-northeast-1a
SPOTINSTANCEPRICE	0.642300	2015-04-01T18:16:32-0500	r3.8xlarge	Linux/UNIX	ap-northeast-1a
SPOTINSTANCEPRICE	0.634700	2015-04-01T18:14:45-0500	r3.8xlarge	Linux/UNIX	ap-northeast-1a
SPOTINSTANCEPRICE	0.642300	2015-04-01T18:12:58-0500	r3.8xlarge	Linux/UNIX	ap-northeast-1a
SPOTINSTANCEPRICE	0.634700	2015-04-01T18:09:25-0500	r3.8xlarge	Linux/UNIX	ap-northeast-1a
SPOTINSTANCEPRICE	0.658600	2015-04-01T18:04:09-0500	r3.8xlarge	Linux/UNIX	ap-northeast-1a
SPOTINSTANCEPRICE	0.676500	2015-04-01T18:00:36-0500	r3.8xlarge	Linux/UNIX	ap-northeast-1a
SPOTINSTANCEPRICE	0.697500	2015-04-01T17:58:47-0500	r3.8xlarge	Linux/UNIX	ap-northeast-1a
SPOTINSTANCEPRICE	0.707900	2015-04-01T17:55:16-0500	r3.8xlarge	Linux/UNIX	ap-northeast-1a
SPOTINSTANCEPRICE	0.687700	2015-04-01T17:42:55-0500	r3.8xlarge	Linux/UNIX	ap-northeast-1a
SPOTINSTANCEPRICE	0.669400	2015-04-01T17:41:11-0500	r3.8xlarge	Linux/UNIX	ap-northeast-1a
SPOTINSTANCEPRICE	0.660900	2015-04-01T17:32:25-0500	r3.8xlarge	Linux/UNIX	ap-northeast-1a
SPOTINSTANCEPRICE	0.678300	2015-04-01T17:21:49-0500	r3.8xlarge	Linux/UNIX	ap-northeast-1a
SPOTINSTANCEPRICE	0.687700	2015-04-01T17:20:02-0500	r3.8xlarge	Linux/UNIX	ap-northeast-1a
SPOTINSTANCEPRICE	0.678300	2015-04-01T17:16:32-0500	r3.8xlarge	Linux/UNIX	ap-northeast-1a
SPOTINSTANCEPRICE	0.660900	2015-04-01T16:48:16-0500	r3.8xlarge	Linux/UNIX	ap-northeast-1a
SPOTINSTANCEPRICE	0.678300	2015-04-01T16:46:30-0500	r3.8xlarge	Linux/UNIX	ap-northeast-1a
SPOTINSTANCEPRICE	0.687700	2015-04-01T16:41:13-0500	r3.8xlarge	Linux/UNIX	ap-northeast-1a
SPOTINSTANCEPRICE	0.707900	2015-04-01T16:37:41-0500	r3.8xlarge	Linux/UNIX	ap-northeast-1a
SPOTINSTANCEPRICE	0.718700	2015-04-01T16:32:26-0500	r3.8xlarge	Linux/UNIX	ap-northeast-1a
SPOTINSTANCEPRICE	0.687700	2015-04-01T16:30:38-0500	r3.8xlarge	Linux/UNIX	ap-northeast-1a
SPOTINSTANCEPRICE	0.660900	2015-04-01T16:28:52-0500	r3.8xlarge	Linux/UNIX	ap-northeast-1a
SPOTINSTANCEPRICE	0.687700	2015-04-01T16:27:08-0500	r3.8xlarge	Linux/UNIX	ap-northeast-1a
SPOTINSTANCEPRICE	0.660900	2015-04-01T16:07:48-0500	r3.8xlarge	Linux/UNIX	ap-northeast-1a
SPOTINSTANCEPRICE	0.671300	2015-04-01T16:04:18-0500	r3.8xlarge	Linux/UNIX	ap-northeast-1a
SPOTINSTANCEPRICE	0.660900	2015-04-01T16:00:46-0500	r3.8xlarge	Linux/UNIX	ap-northeast-1a
SPOTINSTANCEPRICE	0.652700	2015-04-01T15:41:23-0500	r3.8xlarge	Linux/UNIX	ap-northeast-1a
SPOTINSTANCEPRICE	0.687700	2015-04-01T15:39:37-0500	r3.8xlarge	Linux/UNIX	ap-northeast-1a
SPOTINSTANCEPRICE	0.678300	2015-04-01T15:34:20-0500	r3.8xlarge	Linux/UNIX	ap-northeast-1a
SPOTINSTANCEPRICE	0.652700	2015-04-01T15:04:15-0500	r3.8xlarge	Linux/UNIX	ap-northeast-1a
SPOTINSTANCEPRICE	0.660900	2015-04-01T15:02:29-0500	r3.8xlarge	Linux/UNIX	ap-northeast-1a
SPOTINSTANCEPRICE	0.652700	2015-04-01T14:43:00-0500	r3.8xlarge	Linux/UNIX	ap-northeast-1a
SPOTINSTANCEPRICE	0.634700	2015-04-01T14:35:53-0500	r3.8xlarge	Linux/UNIX	ap-northeast-1a
SPOTINSTANCEPRICE	0.627400	2015-04-01T14:19:57-0500	r3.8xlarge	Linux/UNIX	ap-northeast-1a
SPOTINSTANCEPRICE	0.645000	2015-04-01T14:12:52-0500	r3.8xlarge	Linux/UNIX	ap-northeast-1a
SPOTINSTANCEPRICE	0.652700	2015-04-01T13:49:42-0500	r3.8xlarge	Linux/UNIX	ap-northeast-1a
SPOTINSTANCEPRICE	0.680000	2015-04-01T13:42:38-0500	r3.8xlarge	Linux/UNIX	ap-northeast-1a
SPOTINSTANCEPRICE	0.698700	2015-04-01T13:37:19-0500	r3.8xlarge	Linux/UNIX	ap-northeast-1a
SPOTINSTANCEPRICE	0.751500	2015-04-01T13:31:59-0500	r3.8xlarge	Linux/UNIX	ap-northeast-1a
SPOTINSTANCEPRICE	0.763200	2015-04-01T13:28:25-0500	r3.8xlarge	Linux/UNIX	ap-northeast-1a
SPOTINSTANCEPRICE	0.764500	2015-04-01T13:26:39-0500	r3.8xlarge	Linux/UNIX	ap-northeast-1a
SPOTINSTANCEPRICE	0.752500	2015-04-01T13:23:08-0500	r3.8xlarge	Linux/UNIX	ap-northeast-1a
SPOTINSTANCEPRICE	0.719800	2015-04-01T13:16:05-0500	r3.8xlarge	Linux/UNIX	ap-northeast-1a
SPOTINSTANCEPRICE	0.752500	2015-04-01T13:01:50-0500	r3.8xlarge	Linux/UNIX	ap-northeast-1a
SPOTINSTANCEPRICE	0.719800	2015-04-01T12:58:15-0500	r3.8xlarge	Linux/UNIX	ap-northeast-1a
SPOTINSTANCEPRICE	0.752500	2015-04-01T12:52:58-0500	r3.8xlarge	Linux/UNIX	ap-northeast-1a
SPOTINSTANCEPRICE	0.709900	2015-04-01T12:37:05-0500	r3.8xlarge	Linux/UNIX	ap-northeast-1a
SPOTINSTANCEPRICE	0.719800	2015-04-01T12:22:54-0500	r3.8xlarge	Linux/UNIX	ap-northeast-1a
SPOTINSTANCEPRICE	0.642300	2015-04-01T12:21:07-0500	r3.8xlarge	Linux/UNIX	ap-northeast-1a
SPOTINSTANCEPRICE	0.634700	2015-04-01T11:44:01-0500	r3.8xlarge	Linux/UNIX	ap-northeast-1a
SPOTINSTANCEPRICE	0.642300	2015-04-01T11:36:58-0500	r3.8xlarge	Linux/UNIX	ap-northeast-1a
SPOTINSTANCEPRICE	0.650200	2015-04-01T11:14:02-0500	r3.8xlarge	Linux/UNIX	ap-northeast-1a
SPOTINSTANCEPRICE	0.658600	2015-04-01T11:12:15-0500	r3.8xlarge	Linux/UNIX	ap-northeast-1a
SPOTINSTANCEPRICE	0.650200	2015-04-01T10:56:14-0500	r3.8xlarge	Linux/UNIX	ap-northeast-1a
SPOTINSTANCEPRICE	0.667300	2015-04-01T10:47:25-0500	r3.8xlarge	Linux/UNIX	ap-northeast-1a
SPOTINSTANCEPRICE	0.642300	2015-04-01T10:42:08-0500	r3.8xlarge	Linux/UNIX	ap-northeast-1a
SPOTINSTANCEPRICE	0.667300	2015-04-01T10:40:21-0500	r3.8xlarge	Linux/UNIX	ap-northeast-1a
SPOTINSTANCEPRICE	0.642300	2015-04-01T10:33:17-0500	r3.8xlarge	Linux/UNIX	ap-northeast-1a
SPOTINSTANCEPRICE	0.650200	2015-04-01T10:15:41-0500	r3.8xlarge	Linux/UNIX	ap-northeast-1a
SPOTINSTANCEPRICE	0.667300	2015-04-01T10:05:00-0500	r3.8xlarge	Linux/UNIX	ap-northeast-1a
SPOTINSTANCEPRICE	0.696200	2015-04-01T10:03:15-0500	r3.8xlarge	Linux/UNIX	ap-northeast-1a
SPOTINSTANCEPRICE	0.706900	2015-04-01T09:59:41-0500	r3.8xlarge	Linux/UNIX	ap-northeast-1a
SPOTINSTANCEPRICE	0.667300	2015-04-01T09:45:37-0500	r3.8xlarge	Linux/UNIX	ap-northeast-1a
SPOTINSTANCEPRICE	0.706900	2015-04-01T09:28:02-0500	r3.8xlarge	Linux/UNIX	ap-northeast-1a
SPOTINSTANCEPRICE	0.658600	2015-04-01T08:19:18-0500	r3.8xlarge	Linux/UNIX	ap-northeast-1a
SPOTINSTANCEPRICE	0.698700	2015-04-01T08:14:00-0500	r3.8xlarge	Linux/UNIX	ap-northeast-1a
SPOTINSTANCEPRICE	0.741900	2015-04-01T08:06:59-0500	r3.8xlarge	Linux/UNIX	ap-northeast-1a
SPOTINSTANCEPRICE	0.765900	2015-04-01T08:05:15-0500	r3.8xlarge	Linux/UNIX	ap-northeast-1a
SPOTINSTANCEPRICE	0.779100	2015-04-01T06:51:16-0500	r3.8xlarge	Linux/UNIX	ap-northeast-1a
SPOTINSTANCEPRICE	0.807800	2015-04-01T06:46:02-0500	r3.8xlarge	Linux/UNIX	ap-northeast-1a
SPOTINSTANCEPRICE	0.779100	2015-04-01T05:28:39-0500	r3.8xlarge	Linux/UNIX	ap-northeast-1a
SPOTINSTANCEPRICE	0.793000	2015-04-01T05:26:56-0500	r3.8xlarge	Linux/UNIX	ap-northeast-1a
SPOTINSTANCEPRICE	0.779100	2015-04-01T05:05:50-0500	r3.8xlarge	Linux/UNIX	ap-northeast-1a
SPOTINSTANCEPRICE	0.807800	2015-04-01T05:04:03-0500	r3.8xlarge	Linux/UNIX	ap-northeast-1a
SPOTINSTANCEPRICE	0.823500	2015-04-01T04:56:55-0500	r3.8xlarge	Linux/UNIX	ap-northeast-1a
SPOTINSTANCEPRICE	0.840100	2015-04-01T04:53:22-0500	r3.8xlarge	Linux/UNIX	ap-northeast-1a
SPOTINSTANCEPRICE	0.823500	2015-04-01T04:48:02-0500	r3.8xlarge	Linux/UNIX	ap-northeast-1a
SPOTINSTANCEPRICE	0.807800	2015-04-01T04:42:43-0500	r3.8xlarge	Linux/UNIX	ap-northeast-1a
SPOTINSTANCEPRICE	0.793000	2015-04-01T04:39:10-0500	r3.8xlarge	Linux/UNIX	ap-northeast-1a
SPOTINSTANCEPRICE	0.840100	2015-04-01T04:35:39-0500	r3.8xlarge	Linux/UNIX	ap-northeast-1a
SPOTINSTANCEPRICE	0.779100	2015-04-01T04:17:57-0500	r3.8xlarge	Linux/UNIX	ap-northeast-1a
SPOTINSTANCEPRICE	0.730300	2015-04-01T03:54:43-0500	r3.8xlarge	Linux/UNIX	ap-northeast-1a
SPOTINSTANCEPRICE	0.752500	2015-04-01T03:52:58-0500	r3.8xlarge	Linux/UNIX	ap-northeast-1a
SPOTINSTANCEPRICE	0.777200	2015-04-01T03:13:03-0500	r3.8xlarge	Linux/UNIX	ap-northeast-1a
SPOTINSTANCEPRICE	0.790600	2015-04-01T03:11:16-0500	r3.8xlarge	Linux/UNIX	ap-northeast-1a
SPOTINSTANCEPRICE	0.777200	2015-04-01T03:04:01-0500	r3.8xlarge	Linux/UNIX	ap-northeast-1a
SPOTINSTANCEPRICE	0.753400	2015-04-01T03:02:17-0500	r3.8xlarge	Linux/UNIX	ap-northeast-1a
SPOTINSTANCEPRICE	0.765900	2015-04-01T02:56:54-0500	r3.8xlarge	Linux/UNIX	ap-northeast-1a
SPOTINSTANCEPRICE	0.753400	2015-04-01T02:48:01-0500	r3.8xlarge	Linux/UNIX	ap-northeast-1a
SPOTINSTANCEPRICE	0.765900	2015-04-01T02:46:16-0500	r3.8xlarge	Linux/UNIX	ap-northeast-1a
SPOTINSTANCEPRICE	0.779100	2015-04-01T02:37:20-0500	r3.8xlarge	Linux/UNIX	ap-northeast-1a
SPOTINSTANCEPRICE	0.917200	2015-04-01T02:35:34-0500	r3.8xlarge	Linux/UNIX	ap-northeast-1a
SPOTINSTANCEPRICE	0.898500	2015-04-01T02:31:59-0500	r3.8xlarge	Linux/UNIX	ap-northeast-1a
SPOTINSTANCEPRICE	0.870100	2015-04-01T02:30:12-0500	r3.8xlarge	Linux/UNIX	ap-northeast-1a
SPOTINSTANCEPRICE	0.853700	2015-04-01T02:19:37-0500	r3.8xlarge	Linux/UNIX	ap-northeast-1a
SPOTINSTANCEPRICE	0.823400	2015-04-01T02:07:05-0500	r3.8xlarge	Linux/UNIX	ap-northeast-1a
SPOTINSTANCEPRICE	0.848700	2015-04-01T01:56:27-0500	r3.8xlarge	Linux/UNIX	ap-northeast-1a
SPOTINSTANCEPRICE	0.864400	2015-04-01T01:54:42-0500	r3.8xlarge	Linux/UNIX	ap-northeast-1a
SPOTINSTANCEPRICE	0.848700	2015-04-01T01:42:22-0500	r3.8xlarge	Linux/UNIX	ap-northeast-1a
SPOTINSTANCEPRICE	0.874800	2015-04-01T01:26:26-0500	r3.8xlarge	Linux/UNIX	ap-northeast-1a
SPOTINSTANCEPRICE	0.891600	2015-04-01T00:49:33-0500	r3.8xlarge	Linux/UNIX	ap-northeast-1a
SPOTINSTANCEPRICE	1.011500	2015-04-01T00:44:14-0500	r3.8xlarge	Linux/UNIX	ap-northeast-1a
SPOTINSTANCEPRICE	1.059700	2015-04-01T00:40:45-0500	r3.8xlarge	Linux/UNIX	ap-northeast-1a
SPOTINSTANCEPRICE	1.024600	2015-04-01T00:39:01-0500	r3.8xlarge	Linux/UNIX	ap-northeast-1a
SPOTINSTANCEPRICE	1.001400	2015-04-01T00:37:17-0500	r3.8xlarge	Linux/UNIX	ap-northeast-1a
SPOTINSTANCEPRICE	0.979600	2015-04-01T00:33:46-0500	r3.8xlarge	Linux/UNIX	ap-northeast-1a
SPOTINSTANCEPRICE	1.001400	2015-04-01T00:30:14-0500	r3.8xlarge	Linux/UNIX	ap-northeast-1a
SPOTINSTANCEPRICE	0.979600	2015-04-01T00:23:14-0500	r3.8xlarge	Linux/UNIX	ap-northeast-1a
SPOTINSTANCEPRICE	0.959200	2015-04-01T00:19:44-0500	r3.8xlarge	Linux/UNIX	ap-northeast-1a
SPOTINSTANCEPRICE	1.021300	2015-04-01T00:16:14-0500	r3.8xlarge	Linux/UNIX	ap-northeast-1a
SPOTINSTANCEPRICE	1.069700	2015-04-01T00:12:39-0500	r3.8xlarge	Linux/UNIX	ap-northeast-1a
SPOTINSTANCEPRICE	1.011500	2015-04-01T00:09:09-0500	r3.8xlarge	Linux/UNIX	ap-northeast-1a
SPOTINSTANCEPRICE	0.979600	2015-04-01T00:00:21-0500	r3.8xlarge	Linux/UNIX	ap-northeast-1a
SPOTINSTANCEPRICE	1.044700	2015-03-31T23:56:51-0500	r3.8xlarge	Linux/UNIX	ap-northeast-1a
SPOTINSTANCEPRICE	1.125200	2015-03-31T23:46:19-0500	r3.8xlarge	Linux/UNIX	ap-northeast-1a
SPOTINSTANCEPRICE	0.959100	2015-03-31T23:44:31-0500	r3.8xlarge	Linux/UNIX	ap-northeast-1a
SPOTINSTANCEPRICE	0.940700	2015-03-31T23:42:46-0500	r3.8xlarge	Linux/UNIX	ap-northeast-1a
SPOTINSTANCEPRICE	1.044700	2015-03-31T23:41:00-0500	r3.8xlarge	Linux/UNIX	ap-northeast-1a
SPOTINSTANCEPRICE	0.940700	2015-03-31T23:35:46-0500	r3.8xlarge	Linux/UNIX	ap-northeast-1a
SPOTINSTANCEPRICE	0.914100	2015-03-31T23:32:16-0500	r3.8xlarge	Linux/UNIX	ap-northeast-1a
SPOTINSTANCEPRICE	0.863500	2015-03-31T23:30:27-0500	r3.8xlarge	Linux/UNIX	ap-northeast-1a
SPOTINSTANCEPRICE	0.940700	2015-03-31T23:05:47-0500	r3.8xlarge	Linux/UNIX	ap-northeast-1a
SPOTINSTANCEPRICE	0.891200	2015-03-31T22:58:36-0500	r3.8xlarge	Linux/UNIX	ap-northeast-1a
SPOTINSTANCEPRICE	0.906800	2015-03-31T22:56:51-0500	r3.8xlarge	Linux/UNIX	ap-northeast-1a
SPOTINSTANCEPRICE	0.923300	2015-03-31T22:53:20-0500	r3.8xlarge	Linux/UNIX	ap-northeast-1a
SPOTINSTANCEPRICE	0.906800	2015-03-31T22:49:49-0500	r3.8xlarge	Linux/UNIX	ap-northeast-1a
SPOTINSTANCEPRICE	0.923300	2015-03-31T22:48:03-0500	r3.8xlarge	Linux/UNIX	ap-northeast-1a
SPOTINSTANCEPRICE	0.891200	2015-03-31T22:44:28-0500	r3.8xlarge	Linux/UNIX	ap-northeast-1a
SPOTINSTANCEPRICE	0.915700	2015-03-31T22:40:56-0500	r3.8xlarge	Linux/UNIX	ap-northeast-1a
SPOTINSTANCEPRICE	0.844400	2015-03-31T22:37:25-0500	r3.8xlarge	Linux/UNIX	ap-northeast-1a
SPOTINSTANCEPRICE	0.647400	2015-03-31T22:35:39-0500	r3.8xlarge	Linux/UNIX	ap-northeast-1a
SPOTINSTANCEPRICE	0.613700	2015-03-31T22:12:43-0500	r3.8xlarge	Linux/UNIX	ap-northeast-1a
SPOTINSTANCEPRICE	0.619900	2015-03-31T21:56:53-0500	r3.8xlarge	Linux/UNIX	ap-northeast-1a
SPOTINSTANCEPRICE	0.626400	2015-03-31T21:42:47-0500	r3.8xlarge	Linux/UNIX	ap-northeast-1a
SPOTINSTANCEPRICE	0.642500	2015-03-31T21:37:32-0500	r3.8xlarge	Linux/UNIX	ap-northeast-1a
SPOTINSTANCEPRICE	0.626400	2015-03-31T21:35:46-0500	r3.8xlarge	Linux/UNIX	ap-northeast-1a
SPOTINSTANCEPRICE	0.619900	2015-03-31T20:56:59-0500	r3.8xlarge	Linux/UNIX	ap-northeast-1a
SPOTINSTANCEPRICE	0.626400	2015-03-31T20:55:13-0500	r3.8xlarge	Linux/UNIX	ap-northeast-1a
SPOTINSTANCEPRICE	0.640100	2015-03-31T20:53:29-0500	r3.8xlarge	Linux/UNIX	ap-northeast-1a
SPOTINSTANCEPRICE	0.633100	2015-03-31T20:37:27-0500	r3.8xlarge	Linux/UNIX	ap-northeast-1a
SPOTINSTANCEPRICE	0.649600	2015-03-31T20:33:57-0500	r3.8xlarge	Linux/UNIX	ap-northeast-1a
SPOTINSTANCEPRICE	0.657100	2015-03-31T20:32:13-0500	r3.8xlarge	Linux/UNIX	ap-northeast-1a
SPOTINSTANCEPRICE	0.673000	2015-03-31T20:28:41-0500	r3.8xlarge	Linux/UNIX	ap-northeast-1a
SPOTINSTANCEPRICE	0.657100	2015-03-31T20:18:14-0500	r3.8xlarge	Linux/UNIX	ap-northeast-1a
SPOTINSTANCEPRICE	0.649600	2015-03-31T20:12:53-0500	r3.8xlarge	Linux/UNIX	ap-northeast-1a
SPOTINSTANCEPRICE	0.647400	2015-03-31T20:11:07-0500	r3.8xlarge	Linux/UNIX	ap-northeast-1a
SPOTINSTANCEPRICE	0.640100	2015-03-31T20:09:22-0500	r3.8xlarge	Linux/UNIX	ap-northeast-1a
SPOTINSTANCEPRICE	0.626400	2015-03-31T20:00:33-0500	r3.8xlarge	Linux/UNIX	ap-northeast-1a
SPOTINSTANCEPRICE	0.619900	2015-03-31T19:58:45-0500	r3.8xlarge	Linux/UNIX	ap-northeast-1a
SPOTINSTANCEPRICE	0.626400	2015-03-31T19:42:57-0500	r3.8xlarge	Linux/UNIX	ap-northeast-1a
SPOTINSTANCEPRICE	0.640100	2015-03-31T19:41:11-0500	r3.8xlarge	Linux/UNIX	ap-northeast-1a
SPOTINSTANCEPRICE	0.619900	2015-03-31T19:34:13-0500	r3.8xlarge	Linux/UNIX	ap-northeast-1a
SPOTINSTANCEPRICE	0.610600	2015-03-31T19:30:43-0500	r3.8xlarge	Linux/UNIX	ap-northeast-1a
SPOTINSTANCEPRICE	0.598700	2015-03-31T18:50:21-0500	r3.8xlarge	Linux/UNIX	ap-northeast-1a
SPOTINSTANCEPRICE	0.593100	2015-03-31T18:24:01-0500	r3.8xlarge	Linux/UNIX	ap-northeast-1a
SPOTINSTANCEPRICE	0.598700	2015-03-31T18:15:18-0500	r3.8xlarge	Linux/UNIX	ap-northeast-1a
SPOTINSTANCEPRICE	0.652700	2015-03-31T18:08:18-0500	r3.8xlarge	Linux/UNIX	ap-northeast-1a
SPOTINSTANCEPRICE	0.637500	2015-03-31T18:01:17-0500	r3.8xlarge	Linux/UNIX	ap-northeast-1a
SPOTINSTANCEPRICE	0.630400	2015-03-31T17:54:14-0500	r3.8xlarge	Linux/UNIX	ap-northeast-1a
SPOTINSTANCEPRICE	0.647400	2015-03-31T17:52:27-0500	r3.8xlarge	Linux/UNIX	ap-northeast-1a
SPOTINSTANCEPRICE	0.655000	2015-03-31T17:38:25-0500	r3.8xlarge	Linux/UNIX	ap-northeast-1a
SPOTINSTANCEPRICE	0.671300	2015-03-31T17:31:25-0500	r3.8xlarge	Linux/UNIX	ap-northeast-1a
SPOTINSTANCEPRICE	0.655000	2015-03-31T17:26:10-0500	r3.8xlarge	Linux/UNIX	ap-northeast-1a
SPOTINSTANCEPRICE	0.671300	2015-03-31T17:24:26-0500	r3.8xlarge	Linux/UNIX	ap-northeast-1a
SPOTINSTANCEPRICE	0.655000	2015-03-31T17:13:54-0500	r3.8xlarge	Linux/UNIX	ap-northeast-1a
SPOTINSTANCEPRICE	0.671300	2015-03-31T17:06:52-0500	r3.8xlarge	Linux/UNIX	ap-northeast-1a
SPOTINSTANCEPRICE	0.655000	2015-03-31T16:28:21-0500	r3.8xlarge	Linux/UNIX	ap-northeast-1a
SPOTINSTANCEPRICE	0.640100	2015-03-31T16:09:05-0500	r3.8xlarge	Linux/UNIX	ap-northeast-1a
SPOTINSTANCEPRICE	0.655000	2015-03-31T16:00:20-0500	r3.8xlarge	Linux/UNIX	ap-northeast-1a
SPOTINSTANCEPRICE	0.690300	2015-03-31T15:56:50-0500	r3.8xlarge	Linux/UNIX	ap-northeast-1a
SPOTINSTANCEPRICE	0.671300	2015-03-31T15:55:05-0500	r3.8xlarge	Linux/UNIX	ap-northeast-1a
SPOTINSTANCEPRICE	0.663000	2015-03-31T15:53:22-0500	r3.8xlarge	Linux/UNIX	ap-northeast-1a
SPOTINSTANCEPRICE	0.640100	2015-03-31T15:44:39-0500	r3.8xlarge	Linux/UNIX	ap-northeast-1a
SPOTINSTANCEPRICE	0.633100	2015-03-31T15:32:27-0500	r3.8xlarge	Linux/UNIX	ap-northeast-1a
SPOTINSTANCEPRICE	0.626400	2015-03-31T14:43:29-0500	r3.8xlarge	Linux/UNIX	ap-northeast-1a
SPOTINSTANCEPRICE	0.610600	2015-03-31T14:41:44-0500	r3.8xlarge	Linux/UNIX	ap-northeast-1a
SPOTINSTANCEPRICE	0.604500	2015-03-31T14:36:27-0500	r3.8xlarge	Linux/UNIX	ap-northeast-1a
SPOTINSTANCEPRICE	0.598700	2015-03-31T14:32:57-0500	r3.8xlarge	Linux/UNIX	ap-northeast-1a
SPOTINSTANCEPRICE	0.604500	2015-03-31T14:17:14-0500	r3.8xlarge	Linux/UNIX	ap-northeast-1a
SPOTINSTANCEPRICE	0.598700	2015-03-31T14:01:30-0500	r3.8xlarge	Linux/UNIX	ap-northeast-1a
SPOTINSTANCEPRICE	0.613700	2015-03-31T13:59:43-0500	r3.8xlarge	Linux/UNIX	ap-northeast-1a
SPOTINSTANCEPRICE	0.626400	2015-03-31T13:49:15-0500	r3.8xlarge	Linux/UNIX	ap-northeast-1a
SPOTINSTANCEPRICE	0.642500	2015-03-31T13:47:29-0500	r3.8xlarge	Linux/UNIX	ap-northeast-1a
SPOTINSTANCEPRICE	0.649600	2015-03-31T13:45:44-0500	r3.8xlarge	Linux/UNIX	ap-northeast-1a
SPOTINSTANCEPRICE	0.642500	2015-03-31T13:43:58-0500	r3.8xlarge	Linux/UNIX	ap-northeast-1a
SPOTINSTANCEPRICE	0.649600	2015-03-31T13:38:45-0500	r3.8xlarge	Linux/UNIX	ap-northeast-1a
SPOTINSTANCEPRICE	0.657100	2015-03-31T13:31:48-0500	r3.8xlarge	Linux/UNIX	ap-northeast-1a
SPOTINSTANCEPRICE	0.673000	2015-03-31T13:23:06-0500	r3.8xlarge	Linux/UNIX	ap-northeast-1a
SPOTINSTANCEPRICE	0.664900	2015-03-31T13:19:37-0500	r3.8xlarge	Linux/UNIX	ap-northeast-1a
SPOTINSTANCEPRICE	0.729700	2015-03-31T13:12:35-0500	r3.8xlarge	Linux/UNIX	ap-northeast-1a
SPOTINSTANCEPRICE	0.710300	2015-03-31T13:10:51-0500	r3.8xlarge	Linux/UNIX	ap-northeast-1a
SPOTINSTANCEPRICE	0.701100	2015-03-31T13:02:05-0500	r3.8xlarge	Linux/UNIX	ap-northeast-1a
SPOTINSTANCEPRICE	0.692300	2015-03-31T12:58:33-0500	r3.8xlarge	Linux/UNIX	ap-northeast-1a
SPOTINSTANCEPRICE	0.701100	2015-03-31T12:32:23-0500	r3.8xlarge	Linux/UNIX	ap-northeast-1a
SPOTINSTANCEPRICE	0.666500	2015-03-31T12:23:36-0500	r3.8xlarge	Linux/UNIX	ap-northeast-1a
SPOTINSTANCEPRICE	0.613700	2015-03-31T12:21:52-0500	r3.8xlarge	Linux/UNIX	ap-northeast-1a
SPOTINSTANCEPRICE	0.607300	2015-03-31T12:07:53-0500	r3.8xlarge	Linux/UNIX	ap-northeast-1a
SPOTINSTANCEPRICE	0.589500	2015-03-31T11:57:23-0500	r3.8xlarge	Linux/UNIX	ap-northeast-1a
SPOTINSTANCEPRICE	0.595200	2015-03-31T11:45:07-0500	r3.8xlarge	Linux/UNIX	ap-northeast-1a
SPOTINSTANCEPRICE	0.601100	2015-03-31T11:41:37-0500	r3.8xlarge	Linux/UNIX	ap-northeast-1a
SPOTINSTANCEPRICE	0.613700	2015-03-31T11:38:08-0500	r3.8xlarge	Linux/UNIX	ap-northeast-1a
SPOTINSTANCEPRICE	0.601100	2015-03-31T11:31:11-0500	r3.8xlarge	Linux/UNIX	ap-northeast-1a
SPOTINSTANCEPRICE	0.613700	2015-03-31T11:29:25-0500	r3.8xlarge	Linux/UNIX	ap-northeast-1a
SPOTINSTANCEPRICE	0.620400	2015-03-31T11:18:56-0500	r3.8xlarge	Linux/UNIX	ap-northeast-1a
SPOTINSTANCEPRICE	0.627400	2015-03-31T11:13:38-0500	r3.8xlarge	Linux/UNIX	ap-northeast-1a
SPOTINSTANCEPRICE	0.607300	2015-03-31T10:31:24-0500	r3.8xlarge	Linux/UNIX	ap-northeast-1a
SPOTINSTANCEPRICE	0.601100	2015-03-31T10:15:33-0500	r3.8xlarge	Linux/UNIX	ap-northeast-1a
SPOTINSTANCEPRICE	0.607300	2015-03-31T09:33:21-0500	r3.8xlarge	Linux/UNIX	ap-northeast-1a
SPOTINSTANCEPRICE	0.613700	2015-03-31T09:31:35-0500	r3.8xlarge	Linux/UNIX	ap-northeast-1a
SPOTINSTANCEPRICE	0.620400	2015-03-31T09:29:49-0500	r3.8xlarge	Linux/UNIX	ap-northeast-1a
SPOTINSTANCEPRICE	0.627400	2015-03-31T09:26:22-0500	r3.8xlarge	Linux/UNIX	ap-northeast-1a
SPOTINSTANCEPRICE	0.634700	2015-03-31T09:17:38-0500	r3.8xlarge	Linux/UNIX	ap-northeast-1a
SPOTINSTANCEPRICE	0.627400	2015-03-31T09:12:20-0500	r3.8xlarge	Linux/UNIX	ap-northeast-1a
SPOTINSTANCEPRICE	0.607300	2015-03-31T08:54:44-0500	r3.8xlarge	Linux/UNIX	ap-northeast-1a
SPOTINSTANCEPRICE	0.623500	2015-03-31T08:37:10-0500	r3.8xlarge	Linux/UNIX	ap-northeast-1a
SPOTINSTANCEPRICE	0.645000	2015-03-31T08:35:24-0500	r3.8xlarge	Linux/UNIX	ap-northeast-1a
SPOTINSTANCEPRICE	0.652700	2015-03-31T08:16:04-0500	r3.8xlarge	Linux/UNIX	ap-northeast-1a
SPOTINSTANCEPRICE	0.645000	2015-03-31T08:05:29-0500	r3.8xlarge	Linux/UNIX	ap-northeast-1a
SPOTINSTANCEPRICE	0.652700	2015-03-31T07:56:40-0500	r3.8xlarge	Linux/UNIX	ap-northeast-1a
SPOTINSTANCEPRICE	0.634700	2015-03-31T07:46:10-0500	r3.8xlarge	Linux/UNIX	ap-northeast-1a
SPOTINSTANCEPRICE	0.642300	2015-03-31T07:16:20-0500	r3.8xlarge	Linux/UNIX	ap-northeast-1a
SPOTINSTANCEPRICE	0.650200	2015-03-31T07:14:32-0500	r3.8xlarge	Linux/UNIX	ap-northeast-1a
SPOTINSTANCEPRICE	0.642300	2015-03-31T06:27:10-0500	r3.8xlarge	Linux/UNIX	ap-northeast-1a
SPOTINSTANCEPRICE	0.658600	2015-03-31T06:12:55-0500	r3.8xlarge	Linux/UNIX	ap-northeast-1a
SPOTINSTANCEPRICE	0.642300	2015-03-31T05:33:39-0500	r3.8xlarge	Linux/UNIX	ap-northeast-1a
SPOTINSTANCEPRICE	0.650200	2015-03-31T05:03:05-0500	r3.8xlarge	Linux/UNIX	ap-northeast-1a
SPOTINSTANCEPRICE	0.689100	2015-03-31T04:59:28-0500	r3.8xlarge	Linux/UNIX	ap-northeast-1a
SPOTINSTANCEPRICE	0.650200	2015-03-31T04:48:40-0500	r3.8xlarge	Linux/UNIX	ap-northeast-1a
SPOTINSTANCEPRICE	0.667300	2015-03-31T04:34:17-0500	r3.8xlarge	Linux/UNIX	ap-northeast-1a
SPOTINSTANCEPRICE	0.658600	2015-03-31T04:32:31-0500	r3.8xlarge	Linux/UNIX	ap-northeast-1a
SPOTINSTANCEPRICE	0.642300	2015-03-31T04:30:42-0500	r3.8xlarge	Linux/UNIX	ap-northeast-1a
SPOTINSTANCEPRICE	0.680000	2015-03-31T04:28:53-0500	r3.8xlarge	Linux/UNIX	ap-northeast-1a
SPOTINSTANCEPRICE	0.689100	2015-03-31T04:27:08-0500	r3.8xlarge	Linux/UNIX	ap-northeast-1a
SPOTINSTANCEPRICE	0.680000	2015-03-31T04:16:23-0500	r3.8xlarge	Linux/UNIX	ap-northeast-1a
SPOTINSTANCEPRICE	0.671300	2015-03-31T04:12:49-0500	r3.8xlarge	Linux/UNIX	ap-northeast-1a
SPOTINSTANCEPRICE	0.680000	2015-03-31T04:09:10-0500	r3.8xlarge	Linux/UNIX	ap-northeast-1a
SPOTINSTANCEPRICE	0.642300	2015-03-31T04:00:08-0500	r3.8xlarge	Linux/UNIX	ap-northeast-1a
SPOTINSTANCEPRICE	0.686100	2015-03-31T03:58:20-0500	r3.8xlarge	Linux/UNIX	ap-northeast-1a
SPOTINSTANCEPRICE	0.706900	2015-03-31T03:49:19-0500	r3.8xlarge	Linux/UNIX	ap-northeast-1a
SPOTINSTANCEPRICE	0.730200	2015-03-31T02:55:16-0500	r3.8xlarge	Linux/UNIX	ap-northeast-1a
SPOTINSTANCEPRICE	0.767200	2015-03-31T02:53:27-0500	r3.8xlarge	Linux/UNIX	ap-northeast-1a
SPOTINSTANCEPRICE	0.754200	2015-03-31T02:48:04-0500	r3.8xlarge	Linux/UNIX	ap-northeast-1a
SPOTINSTANCEPRICE	0.767200	2015-03-31T02:44:24-0500	r3.8xlarge	Linux/UNIX	ap-northeast-1a
SPOTINSTANCEPRICE	0.742300	2015-03-31T02:34:38-0500	r3.8xlarge	Linux/UNIX	ap-northeast-1a
SPOTINSTANCEPRICE	0.730200	2015-03-31T02:31:04-0500	r3.8xlarge	Linux/UNIX	ap-northeast-1a
SPOTINSTANCEPRICE	0.858900	2015-03-31T02:25:42-0500	r3.8xlarge	Linux/UNIX	ap-northeast-1a
SPOTINSTANCEPRICE	0.831400	2015-03-31T02:16:46-0500	r3.8xlarge	Linux/UNIX	ap-northeast-1a
SPOTINSTANCEPRICE	0.816200	2015-03-31T02:04:07-0500	r3.8xlarge	Linux/UNIX	ap-northeast-1a
SPOTINSTANCEPRICE	0.831400	2015-03-31T02:02:19-0500	r3.8xlarge	Linux/UNIX	ap-northeast-1a
SPOTINSTANCEPRICE	0.816200	2015-03-31T02:00:32-0500	r3.8xlarge	Linux/UNIX	ap-northeast-1a
SPOTINSTANCEPRICE	0.858900	2015-03-31T01:49:42-0500	r3.8xlarge	Linux/UNIX	ap-northeast-1a
SPOTINSTANCEPRICE	1.125200	2015-03-31T01:44:19-0500	r3.8xlarge	Linux/UNIX	ap-northeast-1a
SPOTINSTANCEPRICE	0.959100	2015-03-31T01:30:02-0500	r3.8xlarge	Linux/UNIX	ap-northeast-1a
SPOTINSTANCEPRICE	0.978600	2015-03-31T01:24:42-0500	r3.8xlarge	Linux/UNIX	ap-northeast-1a
SPOTINSTANCEPRICE	0.999300	2015-03-31T01:17:34-0500	r3.8xlarge	Linux/UNIX	ap-northeast-1a
SPOTINSTANCEPRICE	0.978600	2015-03-31T01:13:59-0500	r3.8xlarge	Linux/UNIX	ap-northeast-1a
SPOTINSTANCEPRICE	0.959100	2015-03-31T00:49:12-0500	r3.8xlarge	Linux/UNIX	ap-northeast-1a
SPOTINSTANCEPRICE	0.719800	2015-03-31T00:42:14-0500	r3.8xlarge	Linux/UNIX	ap-northeast-1a
SPOTINSTANCEPRICE	0.829700	2015-03-31T00:40:30-0500	r3.8xlarge	Linux/UNIX	ap-northeast-1a
SPOTINSTANCEPRICE	0.874800	2015-03-31T00:36:58-0500	r3.8xlarge	Linux/UNIX	ap-northeast-1a
SPOTINSTANCEPRICE	0.848700	2015-03-31T00:33:26-0500	r3.8xlarge	Linux/UNIX	ap-northeast-1a
SPOTINSTANCEPRICE	0.793700	2015-03-31T00:10:21-0500	r3.8xlarge	Linux/UNIX	ap-northeast-1a
SPOTINSTANCEPRICE	0.833800	2015-03-30T23:57:57-0500	r3.8xlarge	Linux/UNIX	ap-northeast-1a
SPOTINSTANCEPRICE	0.819800	2015-03-30T23:54:26-0500	r3.8xlarge	Linux/UNIX	ap-northeast-1a
SPOTINSTANCEPRICE	0.793700	2015-03-30T23:52:41-0500	r3.8xlarge	Linux/UNIX	ap-northeast-1a
SPOTINSTANCEPRICE	0.819800	2015-03-30T23:49:10-0500	r3.8xlarge	Linux/UNIX	ap-northeast-1a
SPOTINSTANCEPRICE	0.869000	2015-03-30T23:47:26-0500	r3.8xlarge	Linux/UNIX	ap-northeast-1a
SPOTINSTANCEPRICE	0.901900	2015-03-30T23:43:53-0500	r3.8xlarge	Linux/UNIX	ap-northeast-1a
SPOTINSTANCEPRICE	0.869000	2015-03-30T23:42:08-0500	r3.8xlarge	Linux/UNIX	ap-northeast-1a
SPOTINSTANCEPRICE	0.969000	2015-03-30T23:08:47-0500	r3.8xlarge	Linux/UNIX	ap-northeast-1a
SPOTINSTANCEPRICE	0.989600	2015-03-30T23:07:01-0500	r3.8xlarge	Linux/UNIX	ap-northeast-1a
SPOTINSTANCEPRICE	1.021300	2015-03-30T23:05:15-0500	r3.8xlarge	Linux/UNIX	ap-northeast-1a
SPOTINSTANCEPRICE	0.999300	2015-03-30T22:58:09-0500	r3.8xlarge	Linux/UNIX	ap-northeast-1a
SPOTINSTANCEPRICE	0.969000	2015-03-30T22:49:18-0500	r3.8xlarge	Linux/UNIX	ap-northeast-1a
SPOTINSTANCEPRICE	0.949700	2015-03-30T22:47:34-0500	r3.8xlarge	Linux/UNIX	ap-northeast-1a
SPOTINSTANCEPRICE	0.931400	2015-03-30T22:44:00-0500	r3.8xlarge	Linux/UNIX	ap-northeast-1a
SPOTINSTANCEPRICE	0.914100	2015-03-30T22:38:34-0500	r3.8xlarge	Linux/UNIX	ap-northeast-1a
SPOTINSTANCEPRICE	0.606400	2015-03-30T22:36:47-0500	r3.8xlarge	Linux/UNIX	ap-northeast-1a
SPOTINSTANCEPRICE	0.587300	2015-03-30T22:29:31-0500	r3.8xlarge	Linux/UNIX	ap-northeast-1a
SPOTINSTANCEPRICE	0.593400	2015-03-30T22:13:33-0500	r3.8xlarge	Linux/UNIX	ap-northeast-1a
SPOTINSTANCEPRICE	0.606400	2015-03-30T21:57:38-0500	r3.8xlarge	Linux/UNIX	ap-northeast-1a
SPOTINSTANCEPRICE	0.593400	2015-03-30T21:55:50-0500	r3.8xlarge	Linux/UNIX	ap-northeast-1a
SPOTINSTANCEPRICE	0.610200	2015-03-30T21:52:19-0500	r3.8xlarge	Linux/UNIX	ap-northeast-1a
SPOTINSTANCEPRICE	0.617000	2015-03-30T21:31:14-0500	r3.8xlarge	Linux/UNIX	ap-northeast-1a
SPOTINSTANCEPRICE	0.631500	2015-03-30T21:27:41-0500	r3.8xlarge	Linux/UNIX	ap-northeast-1a
SPOTINSTANCEPRICE	0.617000	2015-03-30T21:17:12-0500	r3.8xlarge	Linux/UNIX	ap-northeast-1a
SPOTINSTANCEPRICE	0.585600	2015-03-30T21:15:26-0500	r3.8xlarge	Linux/UNIX	ap-northeast-1a
SPOTINSTANCEPRICE	0.591400	2015-03-30T21:13:41-0500	r3.8xlarge	Linux/UNIX	ap-northeast-1a
SPOTINSTANCEPRICE	0.585600	2015-03-30T21:10:10-0500	r3.8xlarge	Linux/UNIX	ap-northeast-1a
SPOTINSTANCEPRICE	0.580100	2015-03-30T21:06:40-0500	r3.8xlarge	Linux/UNIX	ap-northeast-1a
SPOTINSTANCEPRICE	0.574800	2015-03-30T21:01:24-0500	r3.8xlarge	Linux/UNIX	ap-northeast-1a
SPOTINSTANCEPRICE	0.601100	2015-03-30T20:57:56-0500	r3.8xlarge	Linux/UNIX	ap-northeast-1a
SPOTINSTANCEPRICE	0.585600	2015-03-30T20:56:09-0500	r3.8xlarge	Linux/UNIX	ap-northeast-1a
SPOTINSTANCEPRICE	0.580100	2015-03-30T20:49:08-0500	r3.8xlarge	Linux/UNIX	ap-northeast-1a
SPOTINSTANCEPRICE	0.595200	2015-03-30T20:43:54-0500	r3.8xlarge	Linux/UNIX	ap-northeast-1a
SPOTINSTANCEPRICE	0.607300	2015-03-30T20:31:37-0500	r3.8xlarge	Linux/UNIX	ap-northeast-1a
SPOTINSTANCEPRICE	0.595200	2015-03-30T20:26:20-0500	r3.8xlarge	Linux/UNIX	ap-northeast-1a
SPOTINSTANCEPRICE	0.607300	2015-03-30T20:22:46-0500	r3.8xlarge	Linux/UNIX	ap-northeast-1a
SPOTINSTANCEPRICE	0.591400	2015-03-30T20:08:38-0500	r3.8xlarge	Linux/UNIX	ap-northeast-1a
SPOTINSTANCEPRICE	0.574800	2015-03-30T20:01:39-0500	r3.8xlarge	Linux/UNIX	ap-northeast-1a
SPOTINSTANCEPRICE	0.569600	2015-03-30T19:56:23-0500	r3.8xlarge	Linux/UNIX	ap-northeast-1a
SPOTINSTANCEPRICE	0.574800	2015-03-30T19:42:25-0500	r3.8xlarge	Linux/UNIX	ap-northeast-1a
SPOTINSTANCEPRICE	0.585600	2015-03-30T19:38:56-0500	r3.8xlarge	Linux/UNIX	ap-northeast-1a
SPOTINSTANCEPRICE	0.569600	2015-03-30T19:33:39-0500	r3.8xlarge	Linux/UNIX	ap-northeast-1a
SPOTINSTANCEPRICE	0.555500	2015-03-30T19:31:56-0500	r3.8xlarge	Linux/UNIX	ap-northeast-1a
SPOTINSTANCEPRICE	0.546500	2015-03-30T19:16:13-0500	r3.8xlarge	Linux/UNIX	ap-northeast-1a
SPOTINSTANCEPRICE	0.542200	2015-03-30T18:46:31-0500	r3.8xlarge	Linux/UNIX	ap-northeast-1a
SPOTINSTANCEPRICE	0.546500	2015-03-30T18:44:46-0500	r3.8xlarge	Linux/UNIX	ap-northeast-1a
SPOTINSTANCEPRICE	0.542200	2015-03-30T18:36:00-0500	r3.8xlarge	Linux/UNIX	ap-northeast-1a
SPOTINSTANCEPRICE	0.678100	2015-03-30T18:34:16-0500	r3.8xlarge	Linux/UNIX	ap-northeast-1a
SPOTINSTANCEPRICE	0.670700	2015-03-30T18:30:46-0500	r3.8xlarge	Linux/UNIX	ap-northeast-1a
SPOTINSTANCEPRICE	0.678100	2015-03-30T18:20:14-0500	r3.8xlarge	Linux/UNIX	ap-northeast-1a
SPOTINSTANCEPRICE	0.663600	2015-03-30T18:00:55-0500	r3.8xlarge	Linux/UNIX	ap-northeast-1a
SPOTINSTANCEPRICE	0.671800	2015-03-30T17:55:39-0500	r3.8xlarge	Linux/UNIX	ap-northeast-1a
SPOTINSTANCEPRICE	0.679000	2015-03-30T17:46:55-0500	r3.8xlarge	Linux/UNIX	ap-northeast-1a
SPOTINSTANCEPRICE	0.686500	2015-03-30T17:45:07-0500	r3.8xlarge	Linux/UNIX	ap-northeast-1a
SPOTINSTANCEPRICE	0.679000	2015-03-30T17:18:52-0500	r3.8xlarge	Linux/UNIX	ap-northeast-1a
SPOTINSTANCEPRICE	0.702500	2015-03-30T17:06:36-0500	r3.8xlarge	Linux/UNIX	ap-northeast-1a
SPOTINSTANCEPRICE	0.710900	2015-03-30T17:03:08-0500	r3.8xlarge	Linux/UNIX	ap-northeast-1a
SPOTINSTANCEPRICE	0.679000	2015-03-30T16:52:45-0500	r3.8xlarge	Linux/UNIX	ap-northeast-1a
SPOTINSTANCEPRICE	0.686500	2015-03-30T16:40:39-0500	r3.8xlarge	Linux/UNIX	ap-northeast-1a
SPOTINSTANCEPRICE	0.710900	2015-03-30T16:35:31-0500	r3.8xlarge	Linux/UNIX	ap-northeast-1a
SPOTINSTANCEPRICE	0.679000	2015-03-30T16:26:54-0500	r3.8xlarge	Linux/UNIX	ap-northeast-1a
SPOTINSTANCEPRICE	0.605000	2015-03-30T16:25:10-0500	r3.8xlarge	Linux/UNIX	ap-northeast-1a
SPOTINSTANCEPRICE	0.679000	2015-03-30T16:23:26-0500	r3.8xlarge	Linux/UNIX	ap-northeast-1a
SPOTINSTANCEPRICE	0.840100	2015-03-30T16:19:51-0500	r3.8xlarge	Linux/UNIX	ap-northeast-1a
SPOTINSTANCEPRICE	0.800000	2015-03-30T15:36:33-0500	r3.8xlarge	Linux/UNIX	ap-northeast-1a
SPOTINSTANCEPRICE	0.796300	2015-03-30T15:34:47-0500	r3.8xlarge	Linux/UNIX	ap-northeast-1a
SPOTINSTANCEPRICE	0.800000	2015-03-30T14:42:55-0500	r3.8xlarge	Linux/UNIX	ap-northeast-1a
SPOTINSTANCEPRICE	0.783800	2015-03-30T14:41:11-0500	r3.8xlarge	Linux/UNIX	ap-northeast-1a
SPOTINSTANCEPRICE	0.771800	2015-03-30T14:03:11-0500	r3.8xlarge	Linux/UNIX	ap-northeast-1a
SPOTINSTANCEPRICE	0.750600	2015-03-30T14:01:27-0500	r3.8xlarge	Linux/UNIX	ap-northeast-1a
SPOTINSTANCEPRICE	0.793700	2015-03-30T13:59:43-0500	r3.8xlarge	Linux/UNIX	ap-northeast-1a
SPOTINSTANCEPRICE	0.800000	2015-03-30T13:54:33-0500	r3.8xlarge	Linux/UNIX	ap-northeast-1a
SPOTINSTANCEPRICE	0.799000	2015-03-30T13:52:51-0500	r3.8xlarge	Linux/UNIX	ap-northeast-1a
SPOTINSTANCEPRICE	0.800000	2015-03-30T13:23:31-0500	r3.8xlarge	Linux/UNIX	ap-northeast-1a
SPOTINSTANCEPRICE	0.751500	2015-03-30T13:21:47-0500	r3.8xlarge	Linux/UNIX	ap-northeast-1a
SPOTINSTANCEPRICE	0.800000	2015-03-30T13:20:03-0500	r3.8xlarge	Linux/UNIX	ap-northeast-1a
SPOTINSTANCEPRICE	0.838100	2015-03-30T13:16:37-0500	r3.8xlarge	Linux/UNIX	ap-northeast-1a
SPOTINSTANCEPRICE	0.827300	2015-03-30T13:13:08-0500	r3.8xlarge	Linux/UNIX	ap-northeast-1a
SPOTINSTANCEPRICE	0.800000	2015-03-30T12:38:29-0500	r3.8xlarge	Linux/UNIX	ap-northeast-1a
SPOTINSTANCEPRICE	0.876200	2015-03-30T12:31:34-0500	r3.8xlarge	Linux/UNIX	ap-northeast-1a
SPOTINSTANCEPRICE	0.842700	2015-03-30T12:24:39-0500	r3.8xlarge	Linux/UNIX	ap-northeast-1a
SPOTINSTANCEPRICE	0.800000	2015-03-30T10:23:14-0500	r3.8xlarge	Linux/UNIX	ap-northeast-1a
SPOTINSTANCEPRICE	0.811000	2015-03-30T10:12:47-0500	r3.8xlarge	Linux/UNIX	ap-northeast-1a
SPOTINSTANCEPRICE	0.800000	2015-03-30T09:58:48-0500	r3.8xlarge	Linux/UNIX	ap-northeast-1a
SPOTINSTANCEPRICE	0.767200	2015-03-30T09:34:30-0500	r3.8xlarge	Linux/UNIX	ap-northeast-1a
SPOTINSTANCEPRICE	0.754200	2015-03-30T09:17:11-0500	r3.8xlarge	Linux/UNIX	ap-northeast-1a
SPOTINSTANCEPRICE	0.741900	2015-03-30T09:10:13-0500	r3.8xlarge	Linux/UNIX	ap-northeast-1a
SPOTINSTANCEPRICE	0.767200	2015-03-30T09:04:58-0500	r3.8xlarge	Linux/UNIX	ap-northeast-1a
SPOTINSTANCEPRICE	0.741900	2015-03-30T09:01:30-0500	r3.8xlarge	Linux/UNIX	ap-northeast-1a
SPOTINSTANCEPRICE	0.754200	2015-03-30T08:44:03-0500	r3.8xlarge	Linux/UNIX	ap-northeast-1a
SPOTINSTANCEPRICE	0.767200	2015-03-30T08:35:24-0500	r3.8xlarge	Linux/UNIX	ap-northeast-1a
SPOTINSTANCEPRICE	0.781000	2015-03-30T08:30:10-0500	r3.8xlarge	Linux/UNIX	ap-northeast-1a
SPOTINSTANCEPRICE	0.754200	2015-03-30T08:23:14-0500	r3.8xlarge	Linux/UNIX	ap-northeast-1a
SPOTINSTANCEPRICE	0.741900	2015-03-30T08:16:23-0500	r3.8xlarge	Linux/UNIX	ap-northeast-1a
SPOTINSTANCEPRICE	0.730300	2015-03-30T08:04:14-0500	r3.8xlarge	Linux/UNIX	ap-northeast-1a
SPOTINSTANCEPRICE	0.754200	2015-03-30T08:00:44-0500	r3.8xlarge	Linux/UNIX	ap-northeast-1a
SPOTINSTANCEPRICE	0.741900	2015-03-30T07:57:13-0500	r3.8xlarge	Linux/UNIX	ap-northeast-1a
SPOTINSTANCEPRICE	0.754200	2015-03-30T07:41:37-0500	r3.8xlarge	Linux/UNIX	ap-northeast-1a
SPOTINSTANCEPRICE	0.741900	2015-03-30T07:36:25-0500	r3.8xlarge	Linux/UNIX	ap-northeast-1a
SPOTINSTANCEPRICE	0.684300	2015-03-30T07:32:59-0500	r3.8xlarge	Linux/UNIX	ap-northeast-1a
SPOTINSTANCEPRICE	0.705700	2015-03-30T07:29:29-0500	r3.8xlarge	Linux/UNIX	ap-northeast-1a
SPOTINSTANCEPRICE	0.682200	2015-03-30T07:20:49-0500	r3.8xlarge	Linux/UNIX	ap-northeast-1a
SPOTINSTANCEPRICE	0.672000	2015-03-30T07:17:23-0500	r3.8xlarge	Linux/UNIX	ap-northeast-1a
SPOTINSTANCEPRICE	0.653100	2015-03-30T07:13:54-0500	r3.8xlarge	Linux/UNIX	ap-northeast-1a
SPOTINSTANCEPRICE	0.662300	2015-03-30T07:12:09-0500	r3.8xlarge	Linux/UNIX	ap-northeast-1a
SPOTINSTANCEPRICE	0.653100	2015-03-30T06:56:29-0500	r3.8xlarge	Linux/UNIX	ap-northeast-1a
SPOTINSTANCEPRICE	0.644400	2015-03-30T06:46:08-0500	r3.8xlarge	Linux/UNIX	ap-northeast-1a
SPOTINSTANCEPRICE	0.662300	2015-03-30T06:42:40-0500	r3.8xlarge	Linux/UNIX	ap-northeast-1a
SPOTINSTANCEPRICE	0.672000	2015-03-30T06:30:21-0500	r3.8xlarge	Linux/UNIX	ap-northeast-1a
SPOTINSTANCEPRICE	0.653100	2015-03-30T06:14:46-0500	r3.8xlarge	Linux/UNIX	ap-northeast-1a
SPOTINSTANCEPRICE	0.644400	2015-03-30T05:35:00-0500	r3.8xlarge	Linux/UNIX	ap-northeast-1a
SPOTINSTANCEPRICE	0.653100	2015-03-30T05:28:05-0500	r3.8xlarge	Linux/UNIX	ap-northeast-1a
SPOTINSTANCEPRICE	0.662300	2015-03-30T05:26:23-0500	r3.8xlarge	Linux/UNIX	ap-northeast-1a
SPOTINSTANCEPRICE	0.653100	2015-03-30T04:58:21-0500	r3.8xlarge	Linux/UNIX	ap-northeast-1a
SPOTINSTANCEPRICE	0.662300	2015-03-30T04:37:15-0500	r3.8xlarge	Linux/UNIX	ap-northeast-1a
SPOTINSTANCEPRICE	0.672000	2015-03-30T04:33:40-0500	r3.8xlarge	Linux/UNIX	ap-northeast-1a
SPOTINSTANCEPRICE	0.662300	2015-03-30T04:31:55-0500	r3.8xlarge	Linux/UNIX	ap-northeast-1a
SPOTINSTANCEPRICE	0.692900	2015-03-30T04:28:23-0500	r3.8xlarge	Linux/UNIX	ap-northeast-1a
SPOTINSTANCEPRICE	0.662300	2015-03-30T03:53:23-0500	r3.8xlarge	Linux/UNIX	ap-northeast-1a
SPOTINSTANCEPRICE	0.653100	2015-03-30T03:49:53-0500	r3.8xlarge	Linux/UNIX	ap-northeast-1a
SPOTINSTANCEPRICE	0.674400	2015-03-30T03:48:08-0500	r3.8xlarge	Linux/UNIX	ap-northeast-1a
SPOTINSTANCEPRICE	0.684300	2015-03-30T03:21:48-0500	r3.8xlarge	Linux/UNIX	ap-northeast-1a
SPOTINSTANCEPRICE	0.665000	2015-03-30T03:07:43-0500	r3.8xlarge	Linux/UNIX	ap-northeast-1a
SPOTINSTANCEPRICE	0.674400	2015-03-30T03:04:13-0500	r3.8xlarge	Linux/UNIX	ap-northeast-1a
SPOTINSTANCEPRICE	0.665000	2015-03-30T03:02:28-0500	r3.8xlarge	Linux/UNIX	ap-northeast-1a
SPOTINSTANCEPRICE	0.656000	2015-03-30T02:55:24-0500	r3.8xlarge	Linux/UNIX	ap-northeast-1a
SPOTINSTANCEPRICE	0.665000	2015-03-30T02:53:39-0500	r3.8xlarge	Linux/UNIX	ap-northeast-1a
SPOTINSTANCEPRICE	0.656000	2015-03-30T02:36:04-0500	r3.8xlarge	Linux/UNIX	ap-northeast-1a
SPOTINSTANCEPRICE	0.647500	2015-03-30T02:30:46-0500	r3.8xlarge	Linux/UNIX	ap-northeast-1a
SPOTINSTANCEPRICE	0.804800	2015-03-30T02:27:15-0500	r3.8xlarge	Linux/UNIX	ap-northeast-1a
SPOTINSTANCEPRICE	0.779100	2015-03-30T02:13:03-0500	r3.8xlarge	Linux/UNIX	ap-northeast-1a
SPOTINSTANCEPRICE	0.741500	2015-03-30T01:55:25-0500	r3.8xlarge	Linux/UNIX	ap-northeast-1a
SPOTINSTANCEPRICE	0.764500	2015-03-30T01:50:09-0500	r3.8xlarge	Linux/UNIX	ap-northeast-1a
SPOTINSTANCEPRICE	0.777200	2015-03-30T01:36:08-0500	r3.8xlarge	Linux/UNIX	ap-northeast-1a
SPOTINSTANCEPRICE	0.804800	2015-03-30T01:22:06-0500	r3.8xlarge	Linux/UNIX	ap-northeast-1a
SPOTINSTANCEPRICE	0.819700	2015-03-30T01:20:20-0500	r3.8xlarge	Linux/UNIX	ap-northeast-1a
SPOTINSTANCEPRICE	0.777200	2015-03-30T00:36:31-0500	r3.8xlarge	Linux/UNIX	ap-northeast-1a
SPOTINSTANCEPRICE	0.909300	2015-03-30T00:33:02-0500	r3.8xlarge	Linux/UNIX	ap-northeast-1a
SPOTINSTANCEPRICE	0.928100	2015-03-30T00:29:30-0500	r3.8xlarge	Linux/UNIX	ap-northeast-1a
SPOTINSTANCEPRICE	0.898500	2015-03-30T00:27:45-0500	r3.8xlarge	Linux/UNIX	ap-northeast-1a
SPOTINSTANCEPRICE	0.881000	2015-03-29T23:49:04-0500	r3.8xlarge	Linux/UNIX	ap-northeast-1a
SPOTINSTANCEPRICE	1.034800	2015-03-29T23:47:20-0500	r3.8xlarge	Linux/UNIX	ap-northeast-1a
SPOTINSTANCEPRICE	1.059700	2015-03-29T23:45:30-0500	r3.8xlarge	Linux/UNIX	ap-northeast-1a
SPOTINSTANCEPRICE	1.086300	2015-03-29T23:38:30-0500	r3.8xlarge	Linux/UNIX	ap-northeast-1a
SPOTINSTANCEPRICE	1.114900	2015-03-29T23:36:46-0500	r3.8xlarge	Linux/UNIX	ap-northeast-1a
SPOTINSTANCEPRICE	1.086300	2015-03-29T22:47:29-0500	r3.8xlarge	Linux/UNIX	ap-northeast-1a
SPOTINSTANCEPRICE	1.034800	2015-03-29T22:38:38-0500	r3.8xlarge	Linux/UNIX	ap-northeast-1a
SPOTINSTANCEPRICE	0.644400	2015-03-29T22:36:54-0500	r3.8xlarge	Linux/UNIX	ap-northeast-1a
SPOTINSTANCEPRICE	0.639300	2015-03-29T22:33:23-0500	r3.8xlarge	Linux/UNIX	ap-northeast-1a
SPOTINSTANCEPRICE	0.647500	2015-03-29T22:22:47-0500	r3.8xlarge	Linux/UNIX	ap-northeast-1a
SPOTINSTANCEPRICE	0.656000	2015-03-29T22:17:27-0500	r3.8xlarge	Linux/UNIX	ap-northeast-1a
SPOTINSTANCEPRICE	0.624100	2015-03-29T22:15:38-0500	r3.8xlarge	Linux/UNIX	ap-northeast-1a
SPOTINSTANCEPRICE	0.631500	2015-03-29T22:13:53-0500	r3.8xlarge	Linux/UNIX	ap-northeast-1a
SPOTINSTANCEPRICE	0.624100	2015-03-29T21:45:45-0500	r3.8xlarge	Linux/UNIX	ap-northeast-1a
SPOTINSTANCEPRICE	0.617000	2015-03-29T21:37:00-0500	r3.8xlarge	Linux/UNIX	ap-northeast-1a
SPOTINSTANCEPRICE	0.634700	2015-03-29T21:33:31-0500	r3.8xlarge	Linux/UNIX	ap-northeast-1a
SPOTINSTANCEPRICE	0.610200	2015-03-29T21:31:45-0500	r3.8xlarge	Linux/UNIX	ap-northeast-1a
SPOTINSTANCEPRICE	0.603700	2015-03-29T21:28:13-0500	r3.8xlarge	Linux/UNIX	ap-northeast-1a
SPOTINSTANCEPRICE	0.610200	2015-03-29T21:26:29-0500	r3.8xlarge	Linux/UNIX	ap-northeast-1a
SPOTINSTANCEPRICE	0.603700	2015-03-29T21:14:15-0500	r3.8xlarge	Linux/UNIX	ap-northeast-1a
SPOTINSTANCEPRICE	0.597400	2015-03-29T21:12:31-0500	r3.8xlarge	Linux/UNIX	ap-northeast-1a
SPOTINSTANCEPRICE	0.603700	2015-03-29T21:02:03-0500	r3.8xlarge	Linux/UNIX	ap-northeast-1a
SPOTINSTANCEPRICE	0.610200	2015-03-29T20:58:31-0500	r3.8xlarge	Linux/UNIX	ap-northeast-1a
SPOTINSTANCEPRICE	0.603700	2015-03-29T20:56:48-0500	r3.8xlarge	Linux/UNIX	ap-northeast-1a
SPOTINSTANCEPRICE	0.591400	2015-03-29T20:53:18-0500	r3.8xlarge	Linux/UNIX	ap-northeast-1a
SPOTINSTANCEPRICE	0.610200	2015-03-29T20:46:18-0500	r3.8xlarge	Linux/UNIX	ap-northeast-1a
SPOTINSTANCEPRICE	0.591400	2015-03-29T20:44:32-0500	r3.8xlarge	Linux/UNIX	ap-northeast-1a
SPOTINSTANCEPRICE	0.580100	2015-03-29T20:42:48-0500	r3.8xlarge	Linux/UNIX	ap-northeast-1a
SPOTINSTANCEPRICE	0.595200	2015-03-29T20:39:19-0500	r3.8xlarge	Linux/UNIX	ap-northeast-1a
SPOTINSTANCEPRICE	0.607300	2015-03-29T20:27:10-0500	r3.8xlarge	Linux/UNIX	ap-northeast-1a
SPOTINSTANCEPRICE	0.601100	2015-03-29T20:18:23-0500	r3.8xlarge	Linux/UNIX	ap-northeast-1a
SPOTINSTANCEPRICE	0.591400	2015-03-29T20:16:38-0500	r3.8xlarge	Linux/UNIX	ap-northeast-1a
SPOTINSTANCEPRICE	0.580100	2015-03-29T20:09:38-0500	r3.8xlarge	Linux/UNIX	ap-northeast-1a
SPOTINSTANCEPRICE	0.585600	2015-03-29T20:07:55-0500	r3.8xlarge	Linux/UNIX	ap-northeast-1a
SPOTINSTANCEPRICE	0.580100	2015-03-29T20:00:55-0500	r3.8xlarge	Linux/UNIX	ap-northeast-1a
SPOTINSTANCEPRICE	0.574800	2015-03-29T19:53:58-0500	r3.8xlarge	Linux/UNIX	ap-northeast-1a
SPOTINSTANCEPRICE	0.580100	2015-03-29T19:33:05-0500	r3.8xlarge	Linux/UNIX	ap-northeast-1a
SPOTINSTANCEPRICE	0.575900	2015-03-29T19:17:21-0500	r3.8xlarge	Linux/UNIX	ap-northeast-1a
SPOTINSTANCEPRICE	0.560300	2015-03-29T19:15:31-0500	r3.8xlarge	Linux/UNIX	ap-northeast-1a
SPOTINSTANCEPRICE	0.555500	2015-03-29T18:00:32-0500	r3.8xlarge	Linux/UNIX	ap-northeast-1a
SPOTINSTANCEPRICE	0.564700	2015-03-29T17:55:18-0500	r3.8xlarge	Linux/UNIX	ap-northeast-1a
SPOTINSTANCEPRICE	0.569600	2015-03-29T17:44:52-0500	r3.8xlarge	Linux/UNIX	ap-northeast-1a
SPOTINSTANCEPRICE	0.574800	2015-03-29T17:43:09-0500	r3.8xlarge	Linux/UNIX	ap-northeast-1a
SPOTINSTANCEPRICE	0.569600	2015-03-29T17:36:12-0500	r3.8xlarge	Linux/UNIX	ap-northeast-1a
SPOTINSTANCEPRICE	0.580100	2015-03-29T17:32:43-0500	r3.8xlarge	Linux/UNIX	ap-northeast-1a
SPOTINSTANCEPRICE	0.585600	2015-03-29T17:30:59-0500	r3.8xlarge	Linux/UNIX	ap-northeast-1a
SPOTINSTANCEPRICE	0.574800	2015-03-29T17:24:01-0500	r3.8xlarge	Linux/UNIX	ap-northeast-1a
SPOTINSTANCEPRICE	0.580100	2015-03-29T17:20:31-0500	r3.8xlarge	Linux/UNIX	ap-northeast-1a
SPOTINSTANCEPRICE	0.569600	2015-03-29T16:56:12-0500	r3.8xlarge	Linux/UNIX	ap-northeast-1a
SPOTINSTANCEPRICE	0.580100	2015-03-29T16:45:45-0500	r3.8xlarge	Linux/UNIX	ap-northeast-1a
SPOTINSTANCEPRICE	0.585600	2015-03-29T16:40:30-0500	r3.8xlarge	Linux/UNIX	ap-northeast-1a
SPOTINSTANCEPRICE	0.569600	2015-03-29T16:09:11-0500	r3.8xlarge	Linux/UNIX	ap-northeast-1a
SPOTINSTANCEPRICE	0.564700	2015-03-29T16:07:28-0500	r3.8xlarge	Linux/UNIX	ap-northeast-1a
SPOTINSTANCEPRICE	0.578700	2015-03-29T16:02:14-0500	r3.8xlarge	Linux/UNIX	ap-northeast-1a
SPOTINSTANCEPRICE	0.584000	2015-03-29T15:58:42-0500	r3.8xlarge	Linux/UNIX	ap-northeast-1a
SPOTINSTANCEPRICE	0.569600	2015-03-29T15:56:59-0500	r3.8xlarge	Linux/UNIX	ap-northeast-1a
SPOTINSTANCEPRICE	0.564700	2015-03-29T15:36:12-0500	r3.8xlarge	Linux/UNIX	ap-northeast-1a
SPOTINSTANCEPRICE	0.574800	2015-03-29T15:22:19-0500	r3.8xlarge	Linux/UNIX	ap-northeast-1a
SPOTINSTANCEPRICE	0.569600	2015-03-29T15:20:35-0500	r3.8xlarge	Linux/UNIX	ap-northeast-1a
SPOTINSTANCEPRICE	0.559900	2015-03-29T15:08:26-0500	r3.8xlarge	Linux/UNIX	ap-northeast-1a
SPOTINSTANCEPRICE	0.564700	2015-03-29T15:03:14-0500	r3.8xlarge	Linux/UNIX	ap-northeast-1a
SPOTINSTANCEPRICE	0.569600	2015-03-29T15:01:29-0500	r3.8xlarge	Linux/UNIX	ap-northeast-1a
SPOTINSTANCEPRICE	0.559900	2015-03-29T14:47:36-0500	r3.8xlarge	Linux/UNIX	ap-northeast-1a
SPOTINSTANCEPRICE	0.569600	2015-03-29T14:44:02-0500	r3.8xlarge	Linux/UNIX	ap-northeast-1a
SPOTINSTANCEPRICE	0.555500	2015-03-29T14:31:57-0500	r3.8xlarge	Linux/UNIX	ap-northeast-1a
SPOTINSTANCEPRICE	0.542200	2015-03-29T14:07:43-0500	r3.8xlarge	Linux/UNIX	ap-northeast-1a
SPOTINSTANCEPRICE	0.555300	2015-03-29T14:02:31-0500	r3.8xlarge	Linux/UNIX	ap-northeast-1a
SPOTINSTANCEPRICE	0.564700	2015-03-29T14:00:47-0500	r3.8xlarge	Linux/UNIX	ap-northeast-1a
SPOTINSTANCEPRICE	0.569600	2015-03-29T13:57:20-0500	r3.8xlarge	Linux/UNIX	ap-northeast-1a
SPOTINSTANCEPRICE	0.564700	2015-03-29T13:50:24-0500	r3.8xlarge	Linux/UNIX	ap-northeast-1a
SPOTINSTANCEPRICE	0.569600	2015-03-29T13:48:40-0500	r3.8xlarge	Linux/UNIX	ap-northeast-1a
SPOTINSTANCEPRICE	0.564700	2015-03-29T13:43:24-0500	r3.8xlarge	Linux/UNIX	ap-northeast-1a
SPOTINSTANCEPRICE	0.578700	2015-03-29T13:41:40-0500	r3.8xlarge	Linux/UNIX	ap-northeast-1a
SPOTINSTANCEPRICE	0.584000	2015-03-29T13:26:04-0500	r3.8xlarge	Linux/UNIX	ap-northeast-1a
SPOTINSTANCEPRICE	0.578700	2015-03-29T13:24:21-0500	r3.8xlarge	Linux/UNIX	ap-northeast-1a
SPOTINSTANCEPRICE	0.622700	2015-03-29T13:20:53-0500	r3.8xlarge	Linux/UNIX	ap-northeast-1a
SPOTINSTANCEPRICE	0.635600	2015-03-29T13:17:27-0500	r3.8xlarge	Linux/UNIX	ap-northeast-1a
SPOTINSTANCEPRICE	0.619900	2015-03-29T13:15:43-0500	r3.8xlarge	Linux/UNIX	ap-northeast-1a
SPOTINSTANCEPRICE	0.613700	2015-03-29T12:32:25-0500	r3.8xlarge	Linux/UNIX	ap-northeast-1a
SPOTINSTANCEPRICE	0.607700	2015-03-29T12:23:47-0500	r3.8xlarge	Linux/UNIX	ap-northeast-1a
SPOTINSTANCEPRICE	0.550900	2015-03-29T12:20:19-0500	r3.8xlarge	Linux/UNIX	ap-northeast-1a
SPOTINSTANCEPRICE	0.542200	2015-03-29T11:56:02-0500	r3.8xlarge	Linux/UNIX	ap-northeast-1a
SPOTINSTANCEPRICE	0.546500	2015-03-29T11:43:51-0500	r3.8xlarge	Linux/UNIX	ap-northeast-1a
SPOTINSTANCEPRICE	0.550900	2015-03-29T11:05:39-0500	r3.8xlarge	Linux/UNIX	ap-northeast-1a
SPOTINSTANCEPRICE	0.555500	2015-03-29T11:00:16-0500	r3.8xlarge	Linux/UNIX	ap-northeast-1a
SPOTINSTANCEPRICE	0.550900	2015-03-29T10:48:05-0500	r3.8xlarge	Linux/UNIX	ap-northeast-1a
SPOTINSTANCEPRICE	0.555500	2015-03-29T10:46:20-0500	r3.8xlarge	Linux/UNIX	ap-northeast-1a
SPOTINSTANCEPRICE	0.550900	2015-03-29T10:42:49-0500	r3.8xlarge	Linux/UNIX	ap-northeast-1a
SPOTINSTANCEPRICE	0.555500	2015-03-29T10:41:05-0500	r3.8xlarge	Linux/UNIX	ap-northeast-1a
SPOTINSTANCEPRICE	0.550900	2015-03-29T10:18:25-0500	r3.8xlarge	Linux/UNIX	ap-northeast-1a
SPOTINSTANCEPRICE	0.555500	2015-03-29T09:55:38-0500	r3.8xlarge	Linux/UNIX	ap-northeast-1a
SPOTINSTANCEPRICE	0.570500	2015-03-29T09:53:53-0500	r3.8xlarge	Linux/UNIX	ap-northeast-1a
SPOTINSTANCEPRICE	0.565300	2015-03-29T09:39:52-0500	r3.8xlarge	Linux/UNIX	ap-northeast-1a
SPOTINSTANCEPRICE	0.555500	2015-03-29T09:24:15-0500	r3.8xlarge	Linux/UNIX	ap-northeast-1a
SPOTINSTANCEPRICE	0.565300	2015-03-29T09:08:31-0500	r3.8xlarge	Linux/UNIX	ap-northeast-1a
SPOTINSTANCEPRICE	0.555500	2015-03-29T08:16:03-0500	r3.8xlarge	Linux/UNIX	ap-northeast-1a
SPOTINSTANCEPRICE	0.550900	2015-03-29T07:51:30-0500	r3.8xlarge	Linux/UNIX	ap-northeast-1a
SPOTINSTANCEPRICE	0.560300	2015-03-29T07:46:18-0500	r3.8xlarge	Linux/UNIX	ap-northeast-1a
SPOTINSTANCEPRICE	0.550900	2015-03-29T07:40:59-0500	r3.8xlarge	Linux/UNIX	ap-northeast-1a
SPOTINSTANCEPRICE	0.560300	2015-03-29T07:25:15-0500	r3.8xlarge	Linux/UNIX	ap-northeast-1a
SPOTINSTANCEPRICE	0.550900	2015-03-29T06:57:21-0500	r3.8xlarge	Linux/UNIX	ap-northeast-1a
SPOTINSTANCEPRICE	0.555500	2015-03-29T06:45:07-0500	r3.8xlarge	Linux/UNIX	ap-northeast-1a
SPOTINSTANCEPRICE	0.560300	2015-03-29T06:43:25-0500	r3.8xlarge	Linux/UNIX	ap-northeast-1a
SPOTINSTANCEPRICE	0.550900	2015-03-29T06:15:32-0500	r3.8xlarge	Linux/UNIX	ap-northeast-1a
SPOTINSTANCEPRICE	0.560300	2015-03-29T06:13:47-0500	r3.8xlarge	Linux/UNIX	ap-northeast-1a
SPOTINSTANCEPRICE	0.575900	2015-03-29T06:12:04-0500	r3.8xlarge	Linux/UNIX	ap-northeast-1a
SPOTINSTANCEPRICE	0.570500	2015-03-29T06:10:20-0500	r3.8xlarge	Linux/UNIX	ap-northeast-1a
SPOTINSTANCEPRICE	0.560300	2015-03-29T05:59:51-0500	r3.8xlarge	Linux/UNIX	ap-northeast-1a
SPOTINSTANCEPRICE	0.550900	2015-03-29T04:46:28-0500	r3.8xlarge	Linux/UNIX	ap-northeast-1a
SPOTINSTANCEPRICE	0.560300	2015-03-29T04:30:31-0500	r3.8xlarge	Linux/UNIX	ap-northeast-1a
SPOTINSTANCEPRICE	0.550900	2015-03-29T04:25:17-0500	r3.8xlarge	Linux/UNIX	ap-northeast-1a
SPOTINSTANCEPRICE	0.560300	2015-03-29T04:20:01-0500	r3.8xlarge	Linux/UNIX	ap-northeast-1a
SPOTINSTANCEPRICE	0.565300	2015-03-29T04:16:31-0500	r3.8xlarge	Linux/UNIX	ap-northeast-1a
SPOTINSTANCEPRICE	0.560300	2015-03-29T04:11:09-0500	r3.8xlarge	Linux/UNIX	ap-northeast-1a
SPOTINSTANCEPRICE	0.565300	2015-03-29T04:09:18-0500	r3.8xlarge	Linux/UNIX	ap-northeast-1a
SPOTINSTANCEPRICE	0.570500	2015-03-29T04:07:33-0500	r3.8xlarge	Linux/UNIX	ap-northeast-1a
SPOTINSTANCEPRICE	0.550900	2015-03-29T03:42:39-0500	r3.8xlarge	Linux/UNIX	ap-northeast-1a
SPOTINSTANCEPRICE	0.564700	2015-03-29T03:40:48-0500	r3.8xlarge	Linux/UNIX	ap-northeast-1a
SPOTINSTANCEPRICE	0.569600	2015-03-29T03:24:43-0500	r3.8xlarge	Linux/UNIX	ap-northeast-1a
SPOTINSTANCEPRICE	0.574800	2015-03-29T03:15:41-0500	r3.8xlarge	Linux/UNIX	ap-northeast-1a
SPOTINSTANCEPRICE	0.580100	2015-03-29T03:12:08-0500	r3.8xlarge	Linux/UNIX	ap-northeast-1a
SPOTINSTANCEPRICE	0.591400	2015-03-29T03:08:34-0500	r3.8xlarge	Linux/UNIX	ap-northeast-1a
SPOTINSTANCEPRICE	0.574800	2015-03-29T02:57:58-0500	r3.8xlarge	Linux/UNIX	ap-northeast-1a
SPOTINSTANCEPRICE	0.585600	2015-03-29T02:56:11-0500	r3.8xlarge	Linux/UNIX	ap-northeast-1a
SPOTINSTANCEPRICE	0.580100	2015-03-29T02:47:31-0500	r3.8xlarge	Linux/UNIX	ap-northeast-1a
SPOTINSTANCEPRICE	0.585600	2015-03-29T02:42:14-0500	r3.8xlarge	Linux/UNIX	ap-northeast-1a
SPOTINSTANCEPRICE	0.569600	2015-03-29T02:31:36-0500	r3.8xlarge	Linux/UNIX	ap-northeast-1a
SPOTINSTANCEPRICE	0.644600	2015-03-29T02:22:54-0500	r3.8xlarge	Linux/UNIX	ap-northeast-1a
SPOTINSTANCEPRICE	0.629000	2015-03-29T02:00:03-0500	r3.8xlarge	Linux/UNIX	ap-northeast-1a
SPOTINSTANCEPRICE	0.644600	2015-03-29T01:56:33-0500	r3.8xlarge	Linux/UNIX	ap-northeast-1a
SPOTINSTANCEPRICE	0.651700	2015-03-29T01:32:10-0500	r3.8xlarge	Linux/UNIX	ap-northeast-1a
SPOTINSTANCEPRICE	0.674500	2015-03-29T01:26:56-0500	r3.8xlarge	Linux/UNIX	ap-northeast-1a
SPOTINSTANCEPRICE	0.651700	2015-03-29T01:18:18-0500	r3.8xlarge	Linux/UNIX	ap-northeast-1a
SPOTINSTANCEPRICE	0.684900	2015-03-29T01:13:04-0500	r3.8xlarge	Linux/UNIX	ap-northeast-1a
SPOTINSTANCEPRICE	0.710600	2015-03-29T00:48:44-0500	r3.8xlarge	Linux/UNIX	ap-northeast-1a
SPOTINSTANCEPRICE	0.701600	2015-03-29T00:43:30-0500	r3.8xlarge	Linux/UNIX	ap-northeast-1a
SPOTINSTANCEPRICE	0.863500	2015-03-29T00:40:02-0500	r3.8xlarge	Linux/UNIX	ap-northeast-1a
SPOTINSTANCEPRICE	0.839500	2015-03-29T00:36:36-0500	r3.8xlarge	Linux/UNIX	ap-northeast-1a
SPOTINSTANCEPRICE	0.825800	2015-03-29T00:33:08-0500	r3.8xlarge	Linux/UNIX	ap-northeast-1a
SPOTINSTANCEPRICE	0.800500	2015-03-29T00:27:55-0500	r3.8xlarge	Linux/UNIX	ap-northeast-1a
SPOTINSTANCEPRICE	0.759100	2015-03-29T00:24:25-0500	r3.8xlarge	Linux/UNIX	ap-northeast-1a
SPOTINSTANCEPRICE	0.748600	2015-03-29T00:22:41-0500	r3.8xlarge	Linux/UNIX	ap-northeast-1a
SPOTINSTANCEPRICE	0.759100	2015-03-29T00:20:57-0500	r3.8xlarge	Linux/UNIX	ap-northeast-1a
SPOTINSTANCEPRICE	0.748600	2015-03-29T00:00:05-0500	r3.8xlarge	Linux/UNIX	ap-northeast-1a
SPOTINSTANCEPRICE	0.809600	2015-03-28T23:54:54-0500	r3.8xlarge	Linux/UNIX	ap-northeast-1a
SPOTINSTANCEPRICE	0.822100	2015-03-28T23:48:00-0500	r3.8xlarge	Linux/UNIX	ap-northeast-1a
SPOTINSTANCEPRICE	0.853400	2015-03-28T23:46:15-0500	r3.8xlarge	Linux/UNIX	ap-northeast-1a
SPOTINSTANCEPRICE	0.867400	2015-03-28T23:39:16-0500	r3.8xlarge	Linux/UNIX	ap-northeast-1a
SPOTINSTANCEPRICE	0.914100	2015-03-28T23:35:50-0500	r3.8xlarge	Linux/UNIX	ap-northeast-1a
SPOTINSTANCEPRICE	0.793700	2015-03-28T23:34:06-0500	r3.8xlarge	Linux/UNIX	ap-northeast-1a
SPOTINSTANCEPRICE	0.759100	2015-03-28T23:23:39-0500	r3.8xlarge	Linux/UNIX	ap-northeast-1a
SPOTINSTANCEPRICE	0.770100	2015-03-28T23:13:10-0500	r3.8xlarge	Linux/UNIX	ap-northeast-1a
SPOTINSTANCEPRICE	0.781600	2015-03-28T23:11:25-0500	r3.8xlarge	Linux/UNIX	ap-northeast-1a
SPOTINSTANCEPRICE	0.793700	2015-03-28T23:06:13-0500	r3.8xlarge	Linux/UNIX	ap-northeast-1a
SPOTINSTANCEPRICE	0.759100	2015-03-28T22:52:13-0500	r3.8xlarge	Linux/UNIX	ap-northeast-1a
SPOTINSTANCEPRICE	0.793700	2015-03-28T22:46:56-0500	r3.8xlarge	Linux/UNIX	ap-northeast-1a
SPOTINSTANCEPRICE	0.748600	2015-03-28T22:38:08-0500	r3.8xlarge	Linux/UNIX	ap-northeast-1a
SPOTINSTANCEPRICE	0.575900	2015-03-28T22:36:25-0500	r3.8xlarge	Linux/UNIX	ap-northeast-1a
SPOTINSTANCEPRICE	0.574800	2015-03-28T22:34:39-0500	r3.8xlarge	Linux/UNIX	ap-northeast-1a
SPOTINSTANCEPRICE	0.564700	2015-03-28T22:31:11-0500	r3.8xlarge	Linux/UNIX	ap-northeast-1a
SPOTINSTANCEPRICE	0.569600	2015-03-28T21:47:23-0500	r3.8xlarge	Linux/UNIX	ap-northeast-1a
SPOTINSTANCEPRICE	0.585600	2015-03-28T21:45:37-0500	r3.8xlarge	Linux/UNIX	ap-northeast-1a
SPOTINSTANCEPRICE	0.569600	2015-03-28T21:42:07-0500	r3.8xlarge	Linux/UNIX	ap-northeast-1a
SPOTINSTANCEPRICE	0.584000	2015-03-28T21:35:07-0500	r3.8xlarge	Linux/UNIX	ap-northeast-1a
SPOTINSTANCEPRICE	0.569600	2015-03-28T21:10:43-0500	r3.8xlarge	Linux/UNIX	ap-northeast-1a
SPOTINSTANCEPRICE	0.574800	2015-03-28T21:08:59-0500	r3.8xlarge	Linux/UNIX	ap-northeast-1a
SPOTINSTANCEPRICE	0.580100	2015-03-28T20:58:27-0500	r3.8xlarge	Linux/UNIX	ap-northeast-1a
SPOTINSTANCEPRICE	0.574800	2015-03-28T20:54:57-0500	r3.8xlarge	Linux/UNIX	ap-northeast-1a
SPOTINSTANCEPRICE	0.569600	2015-03-28T20:49:41-0500	r3.8xlarge	Linux/UNIX	ap-northeast-1a
SPOTINSTANCEPRICE	0.595200	2015-03-28T20:47:56-0500	r3.8xlarge	Linux/UNIX	ap-northeast-1a
SPOTINSTANCEPRICE	0.607300	2015-03-28T20:46:11-0500	r3.8xlarge	Linux/UNIX	ap-northeast-1a
SPOTINSTANCEPRICE	0.589500	2015-03-28T20:35:43-0500	r3.8xlarge	Linux/UNIX	ap-northeast-1a
SPOTINSTANCEPRICE	0.584000	2015-03-28T20:27:02-0500	r3.8xlarge	Linux/UNIX	ap-northeast-1a
SPOTINSTANCEPRICE	0.569600	2015-03-28T20:21:48-0500	r3.8xlarge	Linux/UNIX	ap-northeast-1a
SPOTINSTANCEPRICE	0.580100	2015-03-28T20:20:04-0500	r3.8xlarge	Linux/UNIX	ap-northeast-1a
SPOTINSTANCEPRICE	0.585600	2015-03-28T20:18:20-0500	r3.8xlarge	Linux/UNIX	ap-northeast-1a
SPOTINSTANCEPRICE	0.580100	2015-03-28T20:09:37-0500	r3.8xlarge	Linux/UNIX	ap-northeast-1a
SPOTINSTANCEPRICE	0.585600	2015-03-28T20:04:16-0500	r3.8xlarge	Linux/UNIX	ap-northeast-1a
SPOTINSTANCEPRICE	0.569600	2015-03-28T19:32:52-0500	r3.8xlarge	Linux/UNIX	ap-northeast-1a
SPOTINSTANCEPRICE	0.555500	2015-03-28T19:31:08-0500	r3.8xlarge	Linux/UNIX	ap-northeast-1a
SPOTINSTANCEPRICE	0.550900	2015-03-28T19:25:53-0500	r3.8xlarge	Linux/UNIX	ap-northeast-1a
SPOTINSTANCEPRICE	0.555500	2015-03-28T19:12:01-0500	r3.8xlarge	Linux/UNIX	ap-northeast-1a
SPOTINSTANCEPRICE	0.560300	2015-03-28T19:06:50-0500	r3.8xlarge	Linux/UNIX	ap-northeast-1a
SPOTINSTANCEPRICE	0.550900	2015-03-28T18:23:26-0500	r3.8xlarge	Linux/UNIX	ap-northeast-1a
SPOTINSTANCEPRICE	0.555500	2015-03-28T18:21:42-0500	r3.8xlarge	Linux/UNIX	ap-northeast-1a
SPOTINSTANCEPRICE	0.550900	2015-03-28T18:00:36-0500	r3.8xlarge	Linux/UNIX	ap-northeast-1a
SPOTINSTANCEPRICE	0.546500	2015-03-28T17:55:22-0500	r3.8xlarge	Linux/UNIX	ap-northeast-1a
SPOTINSTANCEPRICE	0.559900	2015-03-28T17:51:55-0500	r3.8xlarge	Linux/UNIX	ap-northeast-1a
SPOTINSTANCEPRICE	0.569600	2015-03-28T17:34:32-0500	r3.8xlarge	Linux/UNIX	ap-northeast-1a
SPOTINSTANCEPRICE	0.580100	2015-03-28T17:29:18-0500	r3.8xlarge	Linux/UNIX	ap-northeast-1a
SPOTINSTANCEPRICE	0.569600	2015-03-28T16:07:34-0500	r3.8xlarge	Linux/UNIX	ap-northeast-1a
SPOTINSTANCEPRICE	0.578700	2015-03-28T16:02:22-0500	r3.8xlarge	Linux/UNIX	ap-northeast-1a
SPOTINSTANCEPRICE	0.584000	2015-03-28T15:58:50-0500	r3.8xlarge	Linux/UNIX	ap-northeast-1a
SPOTINSTANCEPRICE	0.569600	2015-03-28T15:57:06-0500	r3.8xlarge	Linux/UNIX	ap-northeast-1a
SPOTINSTANCEPRICE	0.564700	2015-03-28T15:51:54-0500	r3.8xlarge	Linux/UNIX	ap-northeast-1a
SPOTINSTANCEPRICE	0.569600	2015-03-28T15:50:09-0500	r3.8xlarge	Linux/UNIX	ap-northeast-1a
SPOTINSTANCEPRICE	0.564700	2015-03-28T15:41:31-0500	r3.8xlarge	Linux/UNIX	ap-northeast-1a
SPOTINSTANCEPRICE	0.569600	2015-03-28T15:39:47-0500	r3.8xlarge	Linux/UNIX	ap-northeast-1a
SPOTINSTANCEPRICE	0.564700	2015-03-28T15:34:36-0500	r3.8xlarge	Linux/UNIX	ap-northeast-1a
SPOTINSTANCEPRICE	0.569600	2015-03-28T15:32:52-0500	r3.8xlarge	Linux/UNIX	ap-northeast-1a
SPOTINSTANCEPRICE	0.559900	2015-03-28T15:27:41-0500	r3.8xlarge	Linux/UNIX	ap-northeast-1a
SPOTINSTANCEPRICE	0.564700	2015-03-28T15:22:29-0500	r3.8xlarge	Linux/UNIX	ap-northeast-1a
SPOTINSTANCEPRICE	0.559900	2015-03-28T15:10:20-0500	r3.8xlarge	Linux/UNIX	ap-northeast-1a
SPOTINSTANCEPRICE	0.564700	2015-03-28T15:08:36-0500	r3.8xlarge	Linux/UNIX	ap-northeast-1a
SPOTINSTANCEPRICE	0.559900	2015-03-28T14:44:20-0500	r3.8xlarge	Linux/UNIX	ap-northeast-1a
SPOTINSTANCEPRICE	0.546500	2015-03-28T14:40:49-0500	r3.8xlarge	Linux/UNIX	ap-northeast-1a
SPOTINSTANCEPRICE	0.542200	2015-03-28T14:18:15-0500	r3.8xlarge	Linux/UNIX	ap-northeast-1a
SPOTINSTANCEPRICE	0.555300	2015-03-28T14:13:03-0500	r3.8xlarge	Linux/UNIX	ap-northeast-1a
SPOTINSTANCEPRICE	0.559900	2015-03-28T13:43:36-0500	r3.8xlarge	Linux/UNIX	ap-northeast-1a
SPOTINSTANCEPRICE	0.573700	2015-03-28T13:41:53-0500	r3.8xlarge	Linux/UNIX	ap-northeast-1a
SPOTINSTANCEPRICE	0.578700	2015-03-28T13:31:29-0500	r3.8xlarge	Linux/UNIX	ap-northeast-1a
SPOTINSTANCEPRICE	0.622700	2015-03-28T13:29:44-0500	r3.8xlarge	Linux/UNIX	ap-northeast-1a
SPOTINSTANCEPRICE	0.629000	2015-03-28T13:26:17-0500	r3.8xlarge	Linux/UNIX	ap-northeast-1a
SPOTINSTANCEPRICE	0.613700	2015-03-28T13:24:32-0500	r3.8xlarge	Linux/UNIX	ap-northeast-1a
SPOTINSTANCEPRICE	0.607700	2015-03-28T12:25:35-0500	r3.8xlarge	Linux/UNIX	ap-northeast-1a
SPOTINSTANCEPRICE	0.564700	2015-03-28T12:22:08-0500	r3.8xlarge	Linux/UNIX	ap-northeast-1a
SPOTINSTANCEPRICE	0.550900	2015-03-28T12:20:25-0500	r3.8xlarge	Linux/UNIX	ap-northeast-1a
SPOTINSTANCEPRICE	0.542200	2015-03-28T11:57:59-0500	r3.8xlarge	Linux/UNIX	ap-northeast-1a
SPOTINSTANCEPRICE	0.546500	2015-03-28T11:56:13-0500	r3.8xlarge	Linux/UNIX	ap-northeast-1a
SPOTINSTANCEPRICE	0.555500	2015-03-28T11:51:04-0500	r3.8xlarge	Linux/UNIX	ap-northeast-1a
SPOTINSTANCEPRICE	0.560300	2015-03-28T11:49:19-0500	r3.8xlarge	Linux/UNIX	ap-northeast-1a
SPOTINSTANCEPRICE	0.555500	2015-03-28T11:44:06-0500	r3.8xlarge	Linux/UNIX	ap-northeast-1a
SPOTINSTANCEPRICE	0.560300	2015-03-28T11:42:23-0500	r3.8xlarge	Linux/UNIX	ap-northeast-1a
SPOTINSTANCEPRICE	0.550900	2015-03-28T10:40:10-0500	r3.8xlarge	Linux/UNIX	ap-northeast-1a
SPOTINSTANCEPRICE	0.555500	2015-03-28T10:38:27-0500	r3.8xlarge	Linux/UNIX	ap-northeast-1a
SPOTINSTANCEPRICE	0.550900	2015-03-28T10:35:00-0500	r3.8xlarge	Linux/UNIX	ap-northeast-1a
SPOTINSTANCEPRICE	0.555500	2015-03-28T07:48:22-0500	r3.8xlarge	Linux/UNIX	ap-northeast-1a
SPOTINSTANCEPRICE	0.565300	2015-03-28T07:43:08-0500	r3.8xlarge	Linux/UNIX	ap-northeast-1a
SPOTINSTANCEPRICE	0.555500	2015-03-28T07:25:44-0500	r3.8xlarge	Linux/UNIX	ap-northeast-1a
SPOTINSTANCEPRICE	0.560300	2015-03-28T07:24:01-0500	r3.8xlarge	Linux/UNIX	ap-northeast-1a
SPOTINSTANCEPRICE	0.565300	2015-03-28T07:11:53-0500	r3.8xlarge	Linux/UNIX	ap-northeast-1a
SPOTINSTANCEPRICE	0.575900	2015-03-28T07:08:26-0500	r3.8xlarge	Linux/UNIX	ap-northeast-1a
SPOTINSTANCEPRICE	0.565300	2015-03-28T06:58:03-0500	r3.8xlarge	Linux/UNIX	ap-northeast-1a
SPOTINSTANCEPRICE	0.555500	2015-03-28T06:18:09-0500	r3.8xlarge	Linux/UNIX	ap-northeast-1a
SPOTINSTANCEPRICE	0.565300	2015-03-28T06:02:33-0500	r3.8xlarge	Linux/UNIX	ap-northeast-1a
SPOTINSTANCEPRICE	0.555500	2015-03-28T05:13:40-0500	r3.8xlarge	Linux/UNIX	ap-northeast-1a
SPOTINSTANCEPRICE	0.587300	2015-03-28T05:11:56-0500	r3.8xlarge	Linux/UNIX	ap-northeast-1a
SPOTINSTANCEPRICE	0.581500	2015-03-28T04:40:14-0500	r3.8xlarge	Linux/UNIX	ap-northeast-1a
SPOTINSTANCEPRICE	0.587300	2015-03-28T04:38:30-0500	r3.8xlarge	Linux/UNIX	ap-northeast-1a
SPOTINSTANCEPRICE	0.581500	2015-03-28T04:15:36-0500	r3.8xlarge	Linux/UNIX	ap-northeast-1a
SPOTINSTANCEPRICE	0.587300	2015-03-28T04:12:04-0500	r3.8xlarge	Linux/UNIX	ap-northeast-1a
SPOTINSTANCEPRICE	0.581500	2015-03-28T03:54:24-0500	r3.8xlarge	Linux/UNIX	ap-northeast-1a
SPOTINSTANCEPRICE	0.599800	2015-03-28T03:50:52-0500	r3.8xlarge	Linux/UNIX	ap-northeast-1a
SPOTINSTANCEPRICE	0.581500	2015-03-28T03:49:06-0500	r3.8xlarge	Linux/UNIX	ap-northeast-1a
SPOTINSTANCEPRICE	0.603700	2015-03-28T03:36:34-0500	r3.8xlarge	Linux/UNIX	ap-northeast-1a
SPOTINSTANCEPRICE	0.617000	2015-03-28T03:27:48-0500	r3.8xlarge	Linux/UNIX	ap-northeast-1a
SPOTINSTANCEPRICE	0.624100	2015-03-28T03:26:03-0500	r3.8xlarge	Linux/UNIX	ap-northeast-1a
SPOTINSTANCEPRICE	0.617000	2015-03-28T03:20:45-0500	r3.8xlarge	Linux/UNIX	ap-northeast-1a
SPOTINSTANCEPRICE	0.603700	2015-03-28T03:17:15-0500	r3.8xlarge	Linux/UNIX	ap-northeast-1a
SPOTINSTANCEPRICE	0.610200	2015-03-28T03:15:26-0500	r3.8xlarge	Linux/UNIX	ap-northeast-1a
SPOTINSTANCEPRICE	0.603700	2015-03-28T03:10:10-0500	r3.8xlarge	Linux/UNIX	ap-northeast-1a
SPOTINSTANCEPRICE	0.617000	2015-03-28T03:08:25-0500	r3.8xlarge	Linux/UNIX	ap-northeast-1a
SPOTINSTANCEPRICE	0.603700	2015-03-28T02:40:19-0500	r3.8xlarge	Linux/UNIX	ap-northeast-1a
SPOTINSTANCEPRICE	0.610200	2015-03-28T02:36:43-0500	r3.8xlarge	Linux/UNIX	ap-northeast-1a
SPOTINSTANCEPRICE	0.627400	2015-03-28T02:29:43-0500	r3.8xlarge	Linux/UNIX	ap-northeast-1a
SPOTINSTANCEPRICE	0.634700	2015-03-28T02:24:27-0500	r3.8xlarge	Linux/UNIX	ap-northeast-1a
SPOTINSTANCEPRICE	0.700400	2015-03-28T02:20:59-0500	r3.8xlarge	Linux/UNIX	ap-northeast-1a
SPOTINSTANCEPRICE	0.681500	2015-03-28T02:19:15-0500	r3.8xlarge	Linux/UNIX	ap-northeast-1a
SPOTINSTANCEPRICE	0.673000	2015-03-28T02:08:31-0500	r3.8xlarge	Linux/UNIX	ap-northeast-1a
SPOTINSTANCEPRICE	0.681500	2015-03-28T02:06:48-0500	r3.8xlarge	Linux/UNIX	ap-northeast-1a
SPOTINSTANCEPRICE	0.673000	2015-03-28T01:54:33-0500	r3.8xlarge	Linux/UNIX	ap-northeast-1a
SPOTINSTANCEPRICE	0.709900	2015-03-28T01:38:54-0500	r3.8xlarge	Linux/UNIX	ap-northeast-1a
SPOTINSTANCEPRICE	0.730100	2015-03-28T01:23:06-0500	r3.8xlarge	Linux/UNIX	ap-northeast-1a
SPOTINSTANCEPRICE	0.709900	2015-03-28T01:17:56-0500	r3.8xlarge	Linux/UNIX	ap-northeast-1a
SPOTINSTANCEPRICE	0.700400	2015-03-28T01:12:42-0500	r3.8xlarge	Linux/UNIX	ap-northeast-1a
SPOTINSTANCEPRICE	0.691400	2015-03-28T01:09:14-0500	r3.8xlarge	Linux/UNIX	ap-northeast-1a
SPOTINSTANCEPRICE	0.709900	2015-03-28T01:02:19-0500	r3.8xlarge	Linux/UNIX	ap-northeast-1a
SPOTINSTANCEPRICE	0.700400	2015-03-28T00:53:37-0500	r3.8xlarge	Linux/UNIX	ap-northeast-1a
SPOTINSTANCEPRICE	0.674500	2015-03-28T00:46:39-0500	r3.8xlarge	Linux/UNIX	ap-northeast-1a
SPOTINSTANCEPRICE	0.666500	2015-03-28T00:43:09-0500	r3.8xlarge	Linux/UNIX	ap-northeast-1a
SPOTINSTANCEPRICE	0.768400	2015-03-28T00:39:43-0500	r3.8xlarge	Linux/UNIX	ap-northeast-1a
SPOTINSTANCEPRICE	0.738500	2015-03-28T00:37:59-0500	r3.8xlarge	Linux/UNIX	ap-northeast-1a
SPOTINSTANCEPRICE	0.728900	2015-03-28T00:32:45-0500	r3.8xlarge	Linux/UNIX	ap-northeast-1a
SPOTINSTANCEPRICE	0.738500	2015-03-28T00:22:17-0500	r3.8xlarge	Linux/UNIX	ap-northeast-1a
SPOTINSTANCEPRICE	0.748600	2015-03-28T00:18:49-0500	r3.8xlarge	Linux/UNIX	ap-northeast-1a
SPOTINSTANCEPRICE	0.738500	2015-03-28T00:11:50-0500	r3.8xlarge	Linux/UNIX	ap-northeast-1a
SPOTINSTANCEPRICE	0.800500	2015-03-28T00:06:37-0500	r3.8xlarge	Linux/UNIX	ap-northeast-1a
SPOTINSTANCEPRICE	0.882200	2015-03-27T23:38:56-0500	r3.8xlarge	Linux/UNIX	ap-northeast-1a
SPOTINSTANCEPRICE	0.914100	2015-03-27T23:33:45-0500	r3.8xlarge	Linux/UNIX	ap-northeast-1a
SPOTINSTANCEPRICE	0.863500	2015-03-27T23:19:49-0500	r3.8xlarge	Linux/UNIX	ap-northeast-1a
SPOTINSTANCEPRICE	0.835200	2015-03-27T23:00:42-0500	r3.8xlarge	Linux/UNIX	ap-northeast-1a
SPOTINSTANCEPRICE	0.858300	2015-03-27T22:57:11-0500	r3.8xlarge	Linux/UNIX	ap-northeast-1a
SPOTINSTANCEPRICE	0.888400	2015-03-27T22:51:57-0500	r3.8xlarge	Linux/UNIX	ap-northeast-1a
SPOTINSTANCEPRICE	0.873000	2015-03-27T22:50:12-0500	r3.8xlarge	Linux/UNIX	ap-northeast-1a
SPOTINSTANCEPRICE	0.858300	2015-03-27T22:46:43-0500	r3.8xlarge	Linux/UNIX	ap-northeast-1a
SPOTINSTANCEPRICE	0.831200	2015-03-27T22:37:57-0500	r3.8xlarge	Linux/UNIX	ap-northeast-1a
SPOTINSTANCEPRICE	0.591400	2015-03-27T22:36:12-0500	r3.8xlarge	Linux/UNIX	ap-northeast-1a
SPOTINSTANCEPRICE	0.574800	2015-03-27T22:32:43-0500	r3.8xlarge	Linux/UNIX	ap-northeast-1a
SPOTINSTANCEPRICE	0.569600	2015-03-27T22:22:15-0500	r3.8xlarge	Linux/UNIX	ap-northeast-1a
SPOTINSTANCEPRICE	0.574800	2015-03-27T22:06:30-0500	r3.8xlarge	Linux/UNIX	ap-northeast-1a
SPOTINSTANCEPRICE	0.589500	2015-03-27T22:03:01-0500	r3.8xlarge	Linux/UNIX	ap-northeast-1a
SPOTINSTANCEPRICE	0.595200	2015-03-27T21:59:29-0500	r3.8xlarge	Linux/UNIX	ap-northeast-1a
SPOTINSTANCEPRICE	0.580100	2015-03-27T21:57:46-0500	r3.8xlarge	Linux/UNIX	ap-northeast-1a
SPOTINSTANCEPRICE	0.574800	2015-03-27T21:38:34-0500	r3.8xlarge	Linux/UNIX	ap-northeast-1a
SPOTINSTANCEPRICE	0.585600	2015-03-27T21:24:40-0500	r3.8xlarge	Linux/UNIX	ap-northeast-1a
SPOTINSTANCEPRICE	0.574800	2015-03-27T21:19:27-0500	r3.8xlarge	Linux/UNIX	ap-northeast-1a
SPOTINSTANCEPRICE	0.580100	2015-03-27T21:17:43-0500	r3.8xlarge	Linux/UNIX	ap-northeast-1a
SPOTINSTANCEPRICE	0.574800	2015-03-27T20:51:29-0500	r3.8xlarge	Linux/UNIX	ap-northeast-1a
SPOTINSTANCEPRICE	0.597400	2015-03-27T20:48:01-0500	r3.8xlarge	Linux/UNIX	ap-northeast-1a
SPOTINSTANCEPRICE	0.613700	2015-03-27T20:42:44-0500	r3.8xlarge	Linux/UNIX	ap-northeast-1a
SPOTINSTANCEPRICE	0.620400	2015-03-27T20:28:46-0500	r3.8xlarge	Linux/UNIX	ap-northeast-1a
SPOTINSTANCEPRICE	0.589500	2015-03-27T20:25:19-0500	r3.8xlarge	Linux/UNIX	ap-northeast-1a
SPOTINSTANCEPRICE	0.620400	2015-03-27T20:21:49-0500	r3.8xlarge	Linux/UNIX	ap-northeast-1a
SPOTINSTANCEPRICE	0.574800	2015-03-27T20:20:03-0500	r3.8xlarge	Linux/UNIX	ap-northeast-1a
SPOTINSTANCEPRICE	0.569600	2015-03-27T19:41:35-0500	r3.8xlarge	Linux/UNIX	ap-northeast-1a
SPOTINSTANCEPRICE	0.574800	2015-03-27T19:32:50-0500	r3.8xlarge	Linux/UNIX	ap-northeast-1a
SPOTINSTANCEPRICE	0.560300	2015-03-27T19:31:06-0500	r3.8xlarge	Linux/UNIX	ap-northeast-1a
SPOTINSTANCEPRICE	0.565300	2015-03-27T19:25:53-0500	r3.8xlarge	Linux/UNIX	ap-northeast-1a
SPOTINSTANCEPRICE	0.550900	2015-03-27T18:49:15-0500	r3.8xlarge	Linux/UNIX	ap-northeast-1a
SPOTINSTANCEPRICE	0.555500	2015-03-27T18:47:32-0500	r3.8xlarge	Linux/UNIX	ap-northeast-1a
SPOTINSTANCEPRICE	0.550900	2015-03-27T18:38:50-0500	r3.8xlarge	Linux/UNIX	ap-northeast-1a
SPOTINSTANCEPRICE	0.555500	2015-03-27T18:37:07-0500	r3.8xlarge	Linux/UNIX	ap-northeast-1a
SPOTINSTANCEPRICE	0.550900	2015-03-27T18:00:37-0500	r3.8xlarge	Linux/UNIX	ap-northeast-1a
SPOTINSTANCEPRICE	0.546500	2015-03-27T17:58:52-0500	r3.8xlarge	Linux/UNIX	ap-northeast-1a
SPOTINSTANCEPRICE	0.550900	2015-03-27T17:57:08-0500	r3.8xlarge	Linux/UNIX	ap-northeast-1a
SPOTINSTANCEPRICE	0.546500	2015-03-27T17:55:23-0500	r3.8xlarge	Linux/UNIX	ap-northeast-1a
SPOTINSTANCEPRICE	0.559900	2015-03-27T17:53:38-0500	r3.8xlarge	Linux/UNIX	ap-northeast-1a
SPOTINSTANCEPRICE	0.569600	2015-03-27T17:24:06-0500	r3.8xlarge	Linux/UNIX	ap-northeast-1a
SPOTINSTANCEPRICE	0.580100	2015-03-27T17:22:22-0500	r3.8xlarge	Linux/UNIX	ap-northeast-1a
SPOTINSTANCEPRICE	0.569600	2015-03-27T17:06:43-0500	r3.8xlarge	Linux/UNIX	ap-northeast-1a
SPOTINSTANCEPRICE	0.574800	2015-03-27T17:04:58-0500	r3.8xlarge	Linux/UNIX	ap-northeast-1a
SPOTINSTANCEPRICE	0.569600	2015-03-27T16:58:01-0500	r3.8xlarge	Linux/UNIX	ap-northeast-1a
SPOTINSTANCEPRICE	0.585600	2015-03-27T16:54:32-0500	r3.8xlarge	Linux/UNIX	ap-northeast-1a
SPOTINSTANCEPRICE	0.569600	2015-03-27T16:52:48-0500	r3.8xlarge	Linux/UNIX	ap-northeast-1a
SPOTINSTANCEPRICE	0.574800	2015-03-27T16:51:04-0500	r3.8xlarge	Linux/UNIX	ap-northeast-1a
SPOTINSTANCEPRICE	0.580100	2015-03-27T16:35:28-0500	r3.8xlarge	Linux/UNIX	ap-northeast-1a
SPOTINSTANCEPRICE	0.569600	2015-03-27T16:09:34-0500	r3.8xlarge	Linux/UNIX	ap-northeast-1a
SPOTINSTANCEPRICE	0.574800	2015-03-27T16:06:08-0500	r3.8xlarge	Linux/UNIX	ap-northeast-1a
SPOTINSTANCEPRICE	0.589500	2015-03-27T16:04:25-0500	r3.8xlarge	Linux/UNIX	ap-northeast-1a
SPOTINSTANCEPRICE	0.601100	2015-03-27T16:00:57-0500	r3.8xlarge	Linux/UNIX	ap-northeast-1a
SPOTINSTANCEPRICE	0.580100	2015-03-27T15:59:11-0500	r3.8xlarge	Linux/UNIX	ap-northeast-1a
SPOTINSTANCEPRICE	0.574800	2015-03-27T15:57:28-0500	r3.8xlarge	Linux/UNIX	ap-northeast-1a
SPOTINSTANCEPRICE	0.580100	2015-03-27T15:52:18-0500	r3.8xlarge	Linux/UNIX	ap-northeast-1a
SPOTINSTANCEPRICE	0.564700	2015-03-27T15:22:47-0500	r3.8xlarge	Linux/UNIX	ap-northeast-1a
SPOTINSTANCEPRICE	0.559900	2015-03-27T15:12:22-0500	r3.8xlarge	Linux/UNIX	ap-northeast-1a
SPOTINSTANCEPRICE	0.569600	2015-03-27T15:10:38-0500	r3.8xlarge	Linux/UNIX	ap-northeast-1a
SPOTINSTANCEPRICE	0.559900	2015-03-27T14:42:48-0500	r3.8xlarge	Linux/UNIX	ap-northeast-1a
SPOTINSTANCEPRICE	0.546500	2015-03-27T14:41:04-0500	r3.8xlarge	Linux/UNIX	ap-northeast-1a
SPOTINSTANCEPRICE	0.542200	2015-03-27T14:28:54-0500	r3.8xlarge	Linux/UNIX	ap-northeast-1a
SPOTINSTANCEPRICE	0.546500	2015-03-27T14:21:57-0500	r3.8xlarge	Linux/UNIX	ap-northeast-1a
SPOTINSTANCEPRICE	0.550900	2015-03-27T14:20:13-0500	r3.8xlarge	Linux/UNIX	ap-northeast-1a
SPOTINSTANCEPRICE	0.555500	2015-03-27T14:11:30-0500	r3.8xlarge	Linux/UNIX	ap-northeast-1a
SPOTINSTANCEPRICE	0.550900	2015-03-27T14:08:01-0500	r3.8xlarge	Linux/UNIX	ap-northeast-1a
SPOTINSTANCEPRICE	0.560300	2015-03-27T14:02:46-0500	r3.8xlarge	Linux/UNIX	ap-northeast-1a
SPOTINSTANCEPRICE	0.546500	2015-03-27T14:01:02-0500	r3.8xlarge	Linux/UNIX	ap-northeast-1a
SPOTINSTANCEPRICE	0.559900	2015-03-27T13:57:34-0500	r3.8xlarge	Linux/UNIX	ap-northeast-1a
SPOTINSTANCEPRICE	0.569600	2015-03-27T13:41:56-0500	r3.8xlarge	Linux/UNIX	ap-northeast-1a
SPOTINSTANCEPRICE	0.595200	2015-03-27T13:40:11-0500	r3.8xlarge	Linux/UNIX	ap-northeast-1a
SPOTINSTANCEPRICE	0.601100	2015-03-27T13:38:28-0500	r3.8xlarge	Linux/UNIX	ap-northeast-1a
SPOTINSTANCEPRICE	0.584000	2015-03-27T13:19:21-0500	r3.8xlarge	Linux/UNIX	ap-northeast-1a
SPOTINSTANCEPRICE	0.629000	2015-03-27T13:15:54-0500	r3.8xlarge	Linux/UNIX	ap-northeast-1a
SPOTINSTANCEPRICE	0.649600	2015-03-27T13:12:23-0500	r3.8xlarge	Linux/UNIX	ap-northeast-1a
SPOTINSTANCEPRICE	0.633100	2015-03-27T13:10:39-0500	r3.8xlarge	Linux/UNIX	ap-northeast-1a
SPOTINSTANCEPRICE	0.626400	2015-03-27T13:05:26-0500	r3.8xlarge	Linux/UNIX	ap-northeast-1a
SPOTINSTANCEPRICE	0.633100	2015-03-27T13:03:40-0500	r3.8xlarge	Linux/UNIX	ap-northeast-1a
SPOTINSTANCEPRICE	0.626400	2015-03-27T13:01:56-0500	r3.8xlarge	Linux/UNIX	ap-northeast-1a
SPOTINSTANCEPRICE	0.633100	2015-03-27T13:00:08-0500	r3.8xlarge	Linux/UNIX	ap-northeast-1a
SPOTINSTANCEPRICE	0.626400	2015-03-27T12:32:24-0500	r3.8xlarge	Linux/UNIX	ap-northeast-1a
SPOTINSTANCEPRICE	0.613700	2015-03-27T12:23:43-0500	r3.8xlarge	Linux/UNIX	ap-northeast-1a
SPOTINSTANCEPRICE	0.555500	2015-03-27T12:21:59-0500	r3.8xlarge	Linux/UNIX	ap-northeast-1a
SPOTINSTANCEPRICE	0.546500	2015-03-27T12:08:07-0500	r3.8xlarge	Linux/UNIX	ap-northeast-1a
SPOTINSTANCEPRICE	0.555500	2015-03-27T12:02:56-0500	r3.8xlarge	Linux/UNIX	ap-northeast-1a
SPOTINSTANCEPRICE	0.546500	2015-03-27T11:52:32-0500	r3.8xlarge	Linux/UNIX	ap-northeast-1a
SPOTINSTANCEPRICE	0.550900	2015-03-27T11:49:04-0500	r3.8xlarge	Linux/UNIX	ap-northeast-1a
SPOTINSTANCEPRICE	0.570500	2015-03-27T11:47:20-0500	r3.8xlarge	Linux/UNIX	ap-northeast-1a
SPOTINSTANCEPRICE	0.575900	2015-03-27T11:16:14-0500	r3.8xlarge	Linux/UNIX	ap-northeast-1a
SPOTINSTANCEPRICE	0.581500	2015-03-27T11:07:36-0500	r3.8xlarge	Linux/UNIX	ap-northeast-1a
SPOTINSTANCEPRICE	0.587300	2015-03-27T11:05:52-0500	r3.8xlarge	Linux/UNIX	ap-northeast-1a
SPOTINSTANCEPRICE	0.581500	2015-03-27T11:00:39-0500	r3.8xlarge	Linux/UNIX	ap-northeast-1a
SPOTINSTANCEPRICE	0.599800	2015-03-27T10:53:43-0500	r3.8xlarge	Linux/UNIX	ap-northeast-1a
SPOTINSTANCEPRICE	0.606400	2015-03-27T10:48:30-0500	r3.8xlarge	Linux/UNIX	ap-northeast-1a
SPOTINSTANCEPRICE	0.613300	2015-03-27T10:45:02-0500	r3.8xlarge	Linux/UNIX	ap-northeast-1a
SPOTINSTANCEPRICE	0.593400	2015-03-27T10:39:53-0500	r3.8xlarge	Linux/UNIX	ap-northeast-1a
SPOTINSTANCEPRICE	0.599800	2015-03-27T10:12:15-0500	r3.8xlarge	Linux/UNIX	ap-northeast-1a
SPOTINSTANCEPRICE	0.606400	2015-03-27T10:10:32-0500	r3.8xlarge	Linux/UNIX	ap-northeast-1a
SPOTINSTANCEPRICE	0.620500	2015-03-27T10:01:56-0500	r3.8xlarge	Linux/UNIX	ap-northeast-1a
SPOTINSTANCEPRICE	0.606400	2015-03-27T09:56:44-0500	r3.8xlarge	Linux/UNIX	ap-northeast-1a
SPOTINSTANCEPRICE	0.613300	2015-03-27T09:55:00-0500	r3.8xlarge	Linux/UNIX	ap-northeast-1a
SPOTINSTANCEPRICE	0.620500	2015-03-27T09:49:51-0500	r3.8xlarge	Linux/UNIX	ap-northeast-1a
SPOTINSTANCEPRICE	0.628100	2015-03-27T09:48:07-0500	r3.8xlarge	Linux/UNIX	ap-northeast-1a
SPOTINSTANCEPRICE	0.636100	2015-03-27T09:42:54-0500	r3.8xlarge	Linux/UNIX	ap-northeast-1a
SPOTINSTANCEPRICE	0.628100	2015-03-27T09:39:26-0500	r3.8xlarge	Linux/UNIX	ap-northeast-1a
SPOTINSTANCEPRICE	0.620500	2015-03-27T09:37:44-0500	r3.8xlarge	Linux/UNIX	ap-northeast-1a
SPOTINSTANCEPRICE	0.628100	2015-03-27T09:32:33-0500	r3.8xlarge	Linux/UNIX	ap-northeast-1a
SPOTINSTANCEPRICE	0.599800	2015-03-27T09:27:19-0500	r3.8xlarge	Linux/UNIX	ap-northeast-1a
SPOTINSTANCEPRICE	0.606400	2015-03-27T09:25:37-0500	r3.8xlarge	Linux/UNIX	ap-northeast-1a
SPOTINSTANCEPRICE	0.599800	2015-03-27T09:22:10-0500	r3.8xlarge	Linux/UNIX	ap-northeast-1a
SPOTINSTANCEPRICE	0.620500	2015-03-27T09:09:58-0500	r3.8xlarge	Linux/UNIX	ap-northeast-1a
SPOTINSTANCEPRICE	0.628100	2015-03-27T09:04:49-0500	r3.8xlarge	Linux/UNIX	ap-northeast-1a
SPOTINSTANCEPRICE	0.599800	2015-03-27T08:54:26-0500	r3.8xlarge	Linux/UNIX	ap-northeast-1a
SPOTINSTANCEPRICE	0.606400	2015-03-27T08:52:42-0500	r3.8xlarge	Linux/UNIX	ap-northeast-1a
SPOTINSTANCEPRICE	0.599800	2015-03-27T08:31:56-0500	r3.8xlarge	Linux/UNIX	ap-northeast-1a
SPOTINSTANCEPRICE	0.606400	2015-03-27T08:24:59-0500	r3.8xlarge	Linux/UNIX	ap-northeast-1a
SPOTINSTANCEPRICE	0.613300	2015-03-27T08:23:16-0500	r3.8xlarge	Linux/UNIX	ap-northeast-1a
SPOTINSTANCEPRICE	0.628100	2015-03-27T08:04:13-0500	r3.8xlarge	Linux/UNIX	ap-northeast-1a
SPOTINSTANCEPRICE	0.636100	2015-03-27T08:00:45-0500	r3.8xlarge	Linux/UNIX	ap-northeast-1a
SPOTINSTANCEPRICE	0.644400	2015-03-27T07:58:58-0500	r3.8xlarge	Linux/UNIX	ap-northeast-1a
SPOTINSTANCEPRICE	0.636100	2015-03-27T07:52:05-0500	r3.8xlarge	Linux/UNIX	ap-northeast-1a
SPOTINSTANCEPRICE	0.620500	2015-03-27T07:19:18-0500	r3.8xlarge	Linux/UNIX	ap-northeast-1a
SPOTINSTANCEPRICE	0.636100	2015-03-27T07:05:30-0500	r3.8xlarge	Linux/UNIX	ap-northeast-1a
SPOTINSTANCEPRICE	0.628100	2015-03-27T07:03:43-0500	r3.8xlarge	Linux/UNIX	ap-northeast-1a
SPOTINSTANCEPRICE	0.620500	2015-03-27T06:44:37-0500	r3.8xlarge	Linux/UNIX	ap-northeast-1a
SPOTINSTANCEPRICE	0.613300	2015-03-27T06:34:15-0500	r3.8xlarge	Linux/UNIX	ap-northeast-1a
SPOTINSTANCEPRICE	0.620500	2015-03-27T06:22:09-0500	r3.8xlarge	Linux/UNIX	ap-northeast-1a
SPOTINSTANCEPRICE	0.628100	2015-03-27T06:20:26-0500	r3.8xlarge	Linux/UNIX	ap-northeast-1a
SPOTINSTANCEPRICE	0.636100	2015-03-27T06:17:01-0500	r3.8xlarge	Linux/UNIX	ap-northeast-1a
SPOTINSTANCEPRICE	0.613300	2015-03-27T06:13:29-0500	r3.8xlarge	Linux/UNIX	ap-northeast-1a
SPOTINSTANCEPRICE	0.620500	2015-03-27T05:45:45-0500	r3.8xlarge	Linux/UNIX	ap-northeast-1a
SPOTINSTANCEPRICE	0.628100	2015-03-27T05:44:00-0500	r3.8xlarge	Linux/UNIX	ap-northeast-1a
SPOTINSTANCEPRICE	0.620500	2015-03-27T05:33:32-0500	r3.8xlarge	Linux/UNIX	ap-northeast-1a
SPOTINSTANCEPRICE	0.628100	2015-03-27T04:46:04-0500	r3.8xlarge	Linux/UNIX	ap-northeast-1a
SPOTINSTANCEPRICE	0.644400	2015-03-27T04:30:09-0500	r3.8xlarge	Linux/UNIX	ap-northeast-1a
SPOTINSTANCEPRICE	0.628100	2015-03-27T04:08:57-0500	r3.8xlarge	Linux/UNIX	ap-northeast-1a
SPOTINSTANCEPRICE	0.636100	2015-03-27T03:53:02-0500	r3.8xlarge	Linux/UNIX	ap-northeast-1a
SPOTINSTANCEPRICE	0.628100	2015-03-27T03:37:12-0500	r3.8xlarge	Linux/UNIX	ap-northeast-1a
SPOTINSTANCEPRICE	0.636100	2015-03-27T03:24:58-0500	r3.8xlarge	Linux/UNIX	ap-northeast-1a
SPOTINSTANCEPRICE	0.628100	2015-03-27T03:00:27-0500	r3.8xlarge	Linux/UNIX	ap-northeast-1a
SPOTINSTANCEPRICE	0.647500	2015-03-27T02:56:58-0500	r3.8xlarge	Linux/UNIX	ap-northeast-1a
SPOTINSTANCEPRICE	0.665000	2015-03-27T02:44:47-0500	r3.8xlarge	Linux/UNIX	ap-northeast-1a
SPOTINSTANCEPRICE	0.656000	2015-03-27T02:09:37-0500	r3.8xlarge	Linux/UNIX	ap-northeast-1a
SPOTINSTANCEPRICE	0.647500	2015-03-27T02:02:37-0500	r3.8xlarge	Linux/UNIX	ap-northeast-1a
SPOTINSTANCEPRICE	0.656000	2015-03-27T02:00:53-0500	r3.8xlarge	Linux/UNIX	ap-northeast-1a
SPOTINSTANCEPRICE	0.647500	2015-03-27T01:55:36-0500	r3.8xlarge	Linux/UNIX	ap-northeast-1a
SPOTINSTANCEPRICE	0.667300	2015-03-27T01:50:19-0500	r3.8xlarge	Linux/UNIX	ap-northeast-1a
SPOTINSTANCEPRICE	0.676500	2015-03-27T01:48:34-0500	r3.8xlarge	Linux/UNIX	ap-northeast-1a
SPOTINSTANCEPRICE	0.686100	2015-03-27T01:36:22-0500	r3.8xlarge	Linux/UNIX	ap-northeast-1a
SPOTINSTANCEPRICE	0.697500	2015-03-27T01:31:06-0500	r3.8xlarge	Linux/UNIX	ap-northeast-1a
SPOTINSTANCEPRICE	0.847400	2015-03-27T01:27:36-0500	r3.8xlarge	Linux/UNIX	ap-northeast-1a
SPOTINSTANCEPRICE	0.819700	2015-03-27T01:25:51-0500	r3.8xlarge	Linux/UNIX	ap-northeast-1a
SPOTINSTANCEPRICE	0.804800	2015-03-27T00:36:50-0500	r3.8xlarge	Linux/UNIX	ap-northeast-1a
SPOTINSTANCEPRICE	0.948100	2015-03-27T00:33:19-0500	r3.8xlarge	Linux/UNIX	ap-northeast-1a
SPOTINSTANCEPRICE	1.157200	2015-03-27T00:29:47-0500	r3.8xlarge	Linux/UNIX	ap-northeast-1a
SPOTINSTANCEPRICE	1.145800	2015-03-27T00:28:04-0500	r3.8xlarge	Linux/UNIX	ap-northeast-1a
SPOTINSTANCEPRICE	1.112800	2015-03-27T00:19:20-0500	r3.8xlarge	Linux/UNIX	ap-northeast-1a
SPOTINSTANCEPRICE	1.145800	2015-03-27T00:03:37-0500	r3.8xlarge	Linux/UNIX	ap-northeast-1a
SPOTINSTANCEPRICE	1.181600	2015-03-26T23:51:22-0500	r3.8xlarge	Linux/UNIX	ap-northeast-1a
SPOTINSTANCEPRICE	1.200000	2015-03-26T22:41:03-0500	r3.8xlarge	Linux/UNIX	ap-northeast-1a
SPOTINSTANCEPRICE	1.142100	2015-03-26T22:37:32-0500	r3.8xlarge	Linux/UNIX	ap-northeast-1a
SPOTINSTANCEPRICE	0.906800	2015-03-26T22:35:47-0500	r3.8xlarge	Linux/UNIX	ap-northeast-1a
SPOTINSTANCEPRICE	0.840400	2015-03-26T22:34:01-0500	r3.8xlarge	Linux/UNIX	ap-northeast-1a
SPOTINSTANCEPRICE	0.821300	2015-03-26T22:32:17-0500	r3.8xlarge	Linux/UNIX	ap-northeast-1a
SPOTINSTANCEPRICE	0.803400	2015-03-26T22:25:13-0500	r3.8xlarge	Linux/UNIX	ap-northeast-1a
SPOTINSTANCEPRICE	0.821300	2015-03-26T22:23:29-0500	r3.8xlarge	Linux/UNIX	ap-northeast-1a
SPOTINSTANCEPRICE	0.803400	2015-03-26T22:00:44-0500	r3.8xlarge	Linux/UNIX	ap-northeast-1a
SPOTINSTANCEPRICE	0.821300	2015-03-26T21:58:58-0500	r3.8xlarge	Linux/UNIX	ap-northeast-1a
SPOTINSTANCEPRICE	0.803400	2015-03-26T21:55:29-0500	r3.8xlarge	Linux/UNIX	ap-northeast-1a
SPOTINSTANCEPRICE	0.821300	2015-03-26T21:52:00-0500	r3.8xlarge	Linux/UNIX	ap-northeast-1a
SPOTINSTANCEPRICE	0.803400	2015-03-26T21:43:15-0500	r3.8xlarge	Linux/UNIX	ap-northeast-1a
SPOTINSTANCEPRICE	0.835800	2015-03-26T21:41:29-0500	r3.8xlarge	Linux/UNIX	ap-northeast-1a
SPOTINSTANCEPRICE	0.855200	2015-03-26T21:38:01-0500	r3.8xlarge	Linux/UNIX	ap-northeast-1a
SPOTINSTANCEPRICE	0.821300	2015-03-26T21:34:33-0500	r3.8xlarge	Linux/UNIX	ap-northeast-1a
SPOTINSTANCEPRICE	0.803400	2015-03-26T21:31:05-0500	r3.8xlarge	Linux/UNIX	ap-northeast-1a
SPOTINSTANCEPRICE	0.821300	2015-03-26T21:22:23-0500	r3.8xlarge	Linux/UNIX	ap-northeast-1a
SPOTINSTANCEPRICE	0.840400	2015-03-26T21:20:36-0500	r3.8xlarge	Linux/UNIX	ap-northeast-1a
SPOTINSTANCEPRICE	0.821300	2015-03-26T21:18:52-0500	r3.8xlarge	Linux/UNIX	ap-northeast-1a
SPOTINSTANCEPRICE	0.860900	2015-03-26T21:15:24-0500	r3.8xlarge	Linux/UNIX	ap-northeast-1a
SPOTINSTANCEPRICE	0.840400	2015-03-26T21:13:39-0500	r3.8xlarge	Linux/UNIX	ap-northeast-1a
SPOTINSTANCEPRICE	0.821300	2015-03-26T20:57:50-0500	r3.8xlarge	Linux/UNIX	ap-northeast-1a
SPOTINSTANCEPRICE	0.742600	2015-03-26T20:36:56-0500	r3.8xlarge	Linux/UNIX	ap-northeast-1a
SPOTINSTANCEPRICE	0.769900	2015-03-26T20:31:44-0500	r3.8xlarge	Linux/UNIX	ap-northeast-1a
SPOTINSTANCEPRICE	0.784800	2015-03-26T20:21:19-0500	r3.8xlarge	Linux/UNIX	ap-northeast-1a
SPOTINSTANCEPRICE	0.769900	2015-03-26T20:10:50-0500	r3.8xlarge	Linux/UNIX	ap-northeast-1a
SPOTINSTANCEPRICE	0.742600	2015-03-26T20:09:06-0500	r3.8xlarge	Linux/UNIX	ap-northeast-1a
SPOTINSTANCEPRICE	0.729600	2015-03-26T20:00:23-0500	r3.8xlarge	Linux/UNIX	ap-northeast-1a
SPOTINSTANCEPRICE	0.705700	2015-03-26T19:58:35-0500	r3.8xlarge	Linux/UNIX	ap-northeast-1a
SPOTINSTANCEPRICE	0.717300	2015-03-26T19:56:50-0500	r3.8xlarge	Linux/UNIX	ap-northeast-1a
SPOTINSTANCEPRICE	0.705700	2015-03-26T19:55:05-0500	r3.8xlarge	Linux/UNIX	ap-northeast-1a
SPOTINSTANCEPRICE	0.591400	2015-03-26T19:34:14-0500	r3.8xlarge	Linux/UNIX	ap-northeast-1a
SPOTINSTANCEPRICE	0.575900	2015-03-26T19:30:46-0500	r3.8xlarge	Linux/UNIX	ap-northeast-1a
SPOTINSTANCEPRICE	0.565300	2015-03-26T19:22:08-0500	r3.8xlarge	Linux/UNIX	ap-northeast-1a
SPOTINSTANCEPRICE	0.575900	2015-03-26T19:06:37-0500	r3.8xlarge	Linux/UNIX	ap-northeast-1a
SPOTINSTANCEPRICE	0.560300	2015-03-26T18:57:56-0500	r3.8xlarge	Linux/UNIX	ap-northeast-1a
SPOTINSTANCEPRICE	0.570500	2015-03-26T18:52:44-0500	r3.8xlarge	Linux/UNIX	ap-northeast-1a
SPOTINSTANCEPRICE	0.575900	2015-03-26T18:38:57-0500	r3.8xlarge	Linux/UNIX	ap-northeast-1a
SPOTINSTANCEPRICE	0.560300	2015-03-26T18:00:57-0500	r3.8xlarge	Linux/UNIX	ap-northeast-1a
SPOTINSTANCEPRICE	0.555500	2015-03-26T17:54:02-0500	r3.8xlarge	Linux/UNIX	ap-northeast-1a
SPOTINSTANCEPRICE	0.574800	2015-03-26T17:52:18-0500	r3.8xlarge	Linux/UNIX	ap-northeast-1a
SPOTINSTANCEPRICE	0.585600	2015-03-26T17:50:36-0500	r3.8xlarge	Linux/UNIX	ap-northeast-1a
SPOTINSTANCEPRICE	0.591400	2015-03-26T17:41:57-0500	r3.8xlarge	Linux/UNIX	ap-northeast-1a
SPOTINSTANCEPRICE	0.574800	2015-03-26T17:14:11-0500	r3.8xlarge	Linux/UNIX	ap-northeast-1a
SPOTINSTANCEPRICE	0.580100	2015-03-26T17:03:42-0500	r3.8xlarge	Linux/UNIX	ap-northeast-1a
SPOTINSTANCEPRICE	0.591400	2015-03-26T16:56:46-0500	r3.8xlarge	Linux/UNIX	ap-northeast-1a
SPOTINSTANCEPRICE	0.574800	2015-03-26T16:41:06-0500	r3.8xlarge	Linux/UNIX	ap-northeast-1a
SPOTINSTANCEPRICE	0.580100	2015-03-26T16:30:42-0500	r3.8xlarge	Linux/UNIX	ap-northeast-1a
SPOTINSTANCEPRICE	0.585600	2015-03-26T16:28:57-0500	r3.8xlarge	Linux/UNIX	ap-northeast-1a
SPOTINSTANCEPRICE	0.591400	2015-03-26T16:23:39-0500	r3.8xlarge	Linux/UNIX	ap-northeast-1a
SPOTINSTANCEPRICE	0.574800	2015-03-26T16:16:43-0500	r3.8xlarge	Linux/UNIX	ap-northeast-1a
SPOTINSTANCEPRICE	0.580100	2015-03-26T16:14:58-0500	r3.8xlarge	Linux/UNIX	ap-northeast-1a
SPOTINSTANCEPRICE	0.574800	2015-03-26T16:08:01-0500	r3.8xlarge	Linux/UNIX	ap-northeast-1a
SPOTINSTANCEPRICE	0.589500	2015-03-26T16:04:29-0500	r3.8xlarge	Linux/UNIX	ap-northeast-1a
SPOTINSTANCEPRICE	0.595200	2015-03-26T16:01:00-0500	r3.8xlarge	Linux/UNIX	ap-northeast-1a
SPOTINSTANCEPRICE	0.580100	2015-03-26T15:59:15-0500	r3.8xlarge	Linux/UNIX	ap-northeast-1a
SPOTINSTANCEPRICE	0.574800	2015-03-26T15:57:32-0500	r3.8xlarge	Linux/UNIX	ap-northeast-1a
SPOTINSTANCEPRICE	0.580100	2015-03-26T15:17:33-0500	r3.8xlarge	Linux/UNIX	ap-northeast-1a
SPOTINSTANCEPRICE	0.574800	2015-03-26T14:42:51-0500	r3.8xlarge	Linux/UNIX	ap-northeast-1a
SPOTINSTANCEPRICE	0.560300	2015-03-26T14:41:07-0500	r3.8xlarge	Linux/UNIX	ap-northeast-1a
SPOTINSTANCEPRICE	0.575900	2015-03-26T14:39:22-0500	r3.8xlarge	Linux/UNIX	ap-northeast-1a
SPOTINSTANCEPRICE	0.570500	2015-03-26T14:37:38-0500	r3.8xlarge	Linux/UNIX	ap-northeast-1a
SPOTINSTANCEPRICE	0.555500	2015-03-26T14:25:25-0500	r3.8xlarge	Linux/UNIX	ap-northeast-1a
SPOTINSTANCEPRICE	0.569600	2015-03-26T14:20:16-0500	r3.8xlarge	Linux/UNIX	ap-northeast-1a
SPOTINSTANCEPRICE	0.574800	2015-03-26T14:01:07-0500	r3.8xlarge	Linux/UNIX	ap-northeast-1a
SPOTINSTANCEPRICE	0.580100	2015-03-26T13:48:54-0500	r3.8xlarge	Linux/UNIX	ap-northeast-1a
SPOTINSTANCEPRICE	0.595200	2015-03-26T13:43:41-0500	r3.8xlarge	Linux/UNIX	ap-northeast-1a
SPOTINSTANCEPRICE	0.601100	2015-03-26T13:38:29-0500	r3.8xlarge	Linux/UNIX	ap-northeast-1a
SPOTINSTANCEPRICE	0.607300	2015-03-26T13:33:18-0500	r3.8xlarge	Linux/UNIX	ap-northeast-1a
SPOTINSTANCEPRICE	0.601100	2015-03-26T13:24:36-0500	r3.8xlarge	Linux/UNIX	ap-northeast-1a
SPOTINSTANCEPRICE	0.657100	2015-03-26T13:22:53-0500	r3.8xlarge	Linux/UNIX	ap-northeast-1a
SPOTINSTANCEPRICE	0.673000	2015-03-26T13:19:26-0500	r3.8xlarge	Linux/UNIX	ap-northeast-1a
SPOTINSTANCEPRICE	0.655000	2015-03-26T13:17:43-0500	r3.8xlarge	Linux/UNIX	ap-northeast-1a
SPOTINSTANCEPRICE	0.671300	2015-03-26T13:02:06-0500	r3.8xlarge	Linux/UNIX	ap-northeast-1a
SPOTINSTANCEPRICE	0.647400	2015-03-26T12:48:14-0500	r3.8xlarge	Linux/UNIX	ap-northeast-1a
SPOTINSTANCEPRICE	0.655000	2015-03-26T12:46:30-0500	r3.8xlarge	Linux/UNIX	ap-northeast-1a
SPOTINSTANCEPRICE	0.647400	2015-03-26T12:32:39-0500	r3.8xlarge	Linux/UNIX	ap-northeast-1a
SPOTINSTANCEPRICE	0.633100	2015-03-26T12:30:56-0500	r3.8xlarge	Linux/UNIX	ap-northeast-1a
SPOTINSTANCEPRICE	0.640100	2015-03-26T12:29:11-0500	r3.8xlarge	Linux/UNIX	ap-northeast-1a
SPOTINSTANCEPRICE	0.647400	2015-03-26T12:23:58-0500	r3.8xlarge	Linux/UNIX	ap-northeast-1a
SPOTINSTANCEPRICE	0.581500	2015-03-26T12:20:28-0500	r3.8xlarge	Linux/UNIX	ap-northeast-1a
SPOTINSTANCEPRICE	0.575900	2015-03-26T12:13:33-0500	r3.8xlarge	Linux/UNIX	ap-northeast-1a
SPOTINSTANCEPRICE	0.560300	2015-03-26T12:08:22-0500	r3.8xlarge	Linux/UNIX	ap-northeast-1a
SPOTINSTANCEPRICE	0.555500	2015-03-26T11:56:08-0500	r3.8xlarge	Linux/UNIX	ap-northeast-1a
SPOTINSTANCEPRICE	0.575900	2015-03-26T11:35:23-0500	r3.8xlarge	Linux/UNIX	ap-northeast-1a
SPOTINSTANCEPRICE	0.565300	2015-03-26T11:23:12-0500	r3.8xlarge	Linux/UNIX	ap-northeast-1a
SPOTINSTANCEPRICE	0.575900	2015-03-26T11:14:31-0500	r3.8xlarge	Linux/UNIX	ap-northeast-1a
SPOTINSTANCEPRICE	0.565300	2015-03-26T11:09:20-0500	r3.8xlarge	Linux/UNIX	ap-northeast-1a
SPOTINSTANCEPRICE	0.575900	2015-03-26T11:07:36-0500	r3.8xlarge	Linux/UNIX	ap-northeast-1a
SPOTINSTANCEPRICE	0.565300	2015-03-26T11:05:52-0500	r3.8xlarge	Linux/UNIX	ap-northeast-1a
SPOTINSTANCEPRICE	0.570500	2015-03-26T11:04:07-0500	r3.8xlarge	Linux/UNIX	ap-northeast-1a
SPOTINSTANCEPRICE	0.593400	2015-03-26T10:51:59-0500	r3.8xlarge	Linux/UNIX	ap-northeast-1a
SPOTINSTANCEPRICE	0.599800	2015-03-26T10:50:15-0500	r3.8xlarge	Linux/UNIX	ap-northeast-1a
SPOTINSTANCEPRICE	0.593400	2015-03-26T10:34:36-0500	r3.8xlarge	Linux/UNIX	ap-northeast-1a
SPOTINSTANCEPRICE	0.599800	2015-03-26T10:12:04-0500	r3.8xlarge	Linux/UNIX	ap-northeast-1a
SPOTINSTANCEPRICE	0.628100	2015-03-26T10:06:53-0500	r3.8xlarge	Linux/UNIX	ap-northeast-1a
SPOTINSTANCEPRICE	0.757000	2015-03-26T09:58:11-0500	r3.8xlarge	Linux/UNIX	ap-northeast-1a
SPOTINSTANCEPRICE	0.704300	2015-03-26T09:25:16-0500	r3.8xlarge	Linux/UNIX	ap-northeast-1a
SPOTINSTANCEPRICE	0.757000	2015-03-26T09:11:23-0500	r3.8xlarge	Linux/UNIX	ap-northeast-1a
SPOTINSTANCEPRICE	0.672000	2015-03-26T08:43:40-0500	r3.8xlarge	Linux/UNIX	ap-northeast-1a
SPOTINSTANCEPRICE	0.682200	2015-03-26T08:40:11-0500	r3.8xlarge	Linux/UNIX	ap-northeast-1a
SPOTINSTANCEPRICE	0.672000	2015-03-26T08:31:34-0500	r3.8xlarge	Linux/UNIX	ap-northeast-1a
SPOTINSTANCEPRICE	0.682200	2015-03-26T08:16:04-0500	r3.8xlarge	Linux/UNIX	ap-northeast-1a
SPOTINSTANCEPRICE	0.672000	2015-03-26T08:03:56-0500	r3.8xlarge	Linux/UNIX	ap-northeast-1a
SPOTINSTANCEPRICE	0.704300	2015-03-26T07:22:23-0500	r3.8xlarge	Linux/UNIX	ap-northeast-1a
SPOTINSTANCEPRICE	0.729100	2015-03-26T07:08:27-0500	r3.8xlarge	Linux/UNIX	ap-northeast-1a
SPOTINSTANCEPRICE	0.704300	2015-03-26T06:21:51-0500	r3.8xlarge	Linux/UNIX	ap-northeast-1a
SPOTINSTANCEPRICE	0.742600	2015-03-26T06:20:08-0500	r3.8xlarge	Linux/UNIX	ap-northeast-1a
SPOTINSTANCEPRICE	0.704300	2015-03-26T06:14:57-0500	r3.8xlarge	Linux/UNIX	ap-northeast-1a
SPOTINSTANCEPRICE	0.716300	2015-03-26T06:11:29-0500	r3.8xlarge	Linux/UNIX	ap-northeast-1a
SPOTINSTANCEPRICE	0.704300	2015-03-26T05:59:21-0500	r3.8xlarge	Linux/UNIX	ap-northeast-1a
SPOTINSTANCEPRICE	0.716300	2015-03-26T05:57:38-0500	r3.8xlarge	Linux/UNIX	ap-northeast-1a
SPOTINSTANCEPRICE	0.704300	2015-03-26T05:50:43-0500	r3.8xlarge	Linux/UNIX	ap-northeast-1a
SPOTINSTANCEPRICE	0.716300	2015-03-26T05:48:59-0500	r3.8xlarge	Linux/UNIX	ap-northeast-1a
SPOTINSTANCEPRICE	0.704300	2015-03-26T05:36:45-0500	r3.8xlarge	Linux/UNIX	ap-northeast-1a
SPOTINSTANCEPRICE	0.716300	2015-03-26T05:35:01-0500	r3.8xlarge	Linux/UNIX	ap-northeast-1a
SPOTINSTANCEPRICE	0.742600	2015-03-26T05:21:12-0500	r3.8xlarge	Linux/UNIX	ap-northeast-1a
SPOTINSTANCEPRICE	0.729100	2015-03-26T05:17:45-0500	r3.8xlarge	Linux/UNIX	ap-northeast-1a
SPOTINSTANCEPRICE	0.742600	2015-03-26T05:14:12-0500	r3.8xlarge	Linux/UNIX	ap-northeast-1a
SPOTINSTANCEPRICE	0.772300	2015-03-26T05:03:41-0500	r3.8xlarge	Linux/UNIX	ap-northeast-1a
SPOTINSTANCEPRICE	0.757000	2015-03-26T05:01:56-0500	r3.8xlarge	Linux/UNIX	ap-northeast-1a
SPOTINSTANCEPRICE	0.742600	2015-03-26T04:58:24-0500	r3.8xlarge	Linux/UNIX	ap-northeast-1a
SPOTINSTANCEPRICE	0.716300	2015-03-26T04:56:39-0500	r3.8xlarge	Linux/UNIX	ap-northeast-1a
SPOTINSTANCEPRICE	0.704300	2015-03-26T04:47:54-0500	r3.8xlarge	Linux/UNIX	ap-northeast-1a
SPOTINSTANCEPRICE	0.716300	2015-03-26T04:46:08-0500	r3.8xlarge	Linux/UNIX	ap-northeast-1a
SPOTINSTANCEPRICE	0.704300	2015-03-26T04:40:49-0500	r3.8xlarge	Linux/UNIX	ap-northeast-1a
SPOTINSTANCEPRICE	0.742600	2015-03-26T04:28:27-0500	r3.8xlarge	Linux/UNIX	ap-northeast-1a
SPOTINSTANCEPRICE	0.757000	2015-03-26T04:24:57-0500	r3.8xlarge	Linux/UNIX	ap-northeast-1a
SPOTINSTANCEPRICE	0.704300	2015-03-26T03:49:44-0500	r3.8xlarge	Linux/UNIX	ap-northeast-1a
SPOTINSTANCEPRICE	0.729100	2015-03-26T03:01:48-0500	r3.8xlarge	Linux/UNIX	ap-northeast-1a
SPOTINSTANCEPRICE	0.756500	2015-03-26T02:59:56-0500	r3.8xlarge	Linux/UNIX	ap-northeast-1a
SPOTINSTANCEPRICE	0.786800	2015-03-26T02:56:27-0500	r3.8xlarge	Linux/UNIX	ap-northeast-1a
SPOTINSTANCEPRICE	0.803400	2015-03-26T02:42:22-0500	r3.8xlarge	Linux/UNIX	ap-northeast-1a
SPOTINSTANCEPRICE	0.786800	2015-03-26T02:38:51-0500	r3.8xlarge	Linux/UNIX	ap-northeast-1a
SPOTINSTANCEPRICE	0.821300	2015-03-26T02:37:05-0500	r3.8xlarge	Linux/UNIX	ap-northeast-1a
SPOTINSTANCEPRICE	0.786800	2015-03-26T02:33:35-0500	r3.8xlarge	Linux/UNIX	ap-northeast-1a
SPOTINSTANCEPRICE	0.771100	2015-03-26T02:30:07-0500	r3.8xlarge	Linux/UNIX	ap-northeast-1a
SPOTINSTANCEPRICE	0.786800	2015-03-26T02:28:23-0500	r3.8xlarge	Linux/UNIX	ap-northeast-1a
SPOTINSTANCEPRICE	0.729600	2015-03-26T01:48:26-0500	r3.8xlarge	Linux/UNIX	ap-northeast-1a
SPOTINSTANCEPRICE	0.840100	2015-03-26T01:44:57-0500	r3.8xlarge	Linux/UNIX	ap-northeast-1a
SPOTINSTANCEPRICE	0.968200	2015-03-26T01:41:30-0500	r3.8xlarge	Linux/UNIX	ap-northeast-1a
SPOTINSTANCEPRICE	0.931800	2015-03-26T01:36:21-0500	r3.8xlarge	Linux/UNIX	ap-northeast-1a
SPOTINSTANCEPRICE	0.955200	2015-03-26T01:12:15-0500	r3.8xlarge	Linux/UNIX	ap-northeast-1a
SPOTINSTANCEPRICE	1.037100	2015-03-26T00:32:29-0500	r3.8xlarge	Linux/UNIX	ap-northeast-1a
SPOTINSTANCEPRICE	1.007600	2015-03-26T00:30:45-0500	r3.8xlarge	Linux/UNIX	ap-northeast-1a
SPOTINSTANCEPRICE	1.200000	2015-03-25T22:38:27-0500	r3.8xlarge	Linux/UNIX	ap-northeast-1a
SPOTINSTANCEPRICE	0.840400	2015-03-25T22:36:44-0500	r3.8xlarge	Linux/UNIX	ap-northeast-1a
SPOTINSTANCEPRICE	0.786800	2015-03-25T22:33:17-0500	r3.8xlarge	Linux/UNIX	ap-northeast-1a
SPOTINSTANCEPRICE	0.771100	2015-03-25T22:03:50-0500	r3.8xlarge	Linux/UNIX	ap-northeast-1a
SPOTINSTANCEPRICE	0.756500	2015-03-25T22:00:22-0500	r3.8xlarge	Linux/UNIX	ap-northeast-1a
SPOTINSTANCEPRICE	0.784800	2015-03-25T21:56:56-0500	r3.8xlarge	Linux/UNIX	ap-northeast-1a
SPOTINSTANCEPRICE	0.800700	2015-03-25T21:53:28-0500	r3.8xlarge	Linux/UNIX	ap-northeast-1a
SPOTINSTANCEPRICE	0.771100	2015-03-25T21:51:46-0500	r3.8xlarge	Linux/UNIX	ap-northeast-1a
SPOTINSTANCEPRICE	0.756500	2015-03-25T21:44:51-0500	r3.8xlarge	Linux/UNIX	ap-northeast-1a
SPOTINSTANCEPRICE	0.684300	2015-03-25T21:27:35-0500	r3.8xlarge	Linux/UNIX	ap-northeast-1a
SPOTINSTANCEPRICE	0.717300	2015-03-25T21:24:04-0500	r3.8xlarge	Linux/UNIX	ap-northeast-1a
SPOTINSTANCEPRICE	0.684300	2015-03-25T21:06:56-0500	r3.8xlarge	Linux/UNIX	ap-northeast-1a
SPOTINSTANCEPRICE	0.755800	2015-03-25T21:03:28-0500	r3.8xlarge	Linux/UNIX	ap-northeast-1a
SPOTINSTANCEPRICE	0.784800	2015-03-25T20:58:15-0500	r3.8xlarge	Linux/UNIX	ap-northeast-1a
SPOTINSTANCEPRICE	0.718100	2015-03-25T20:51:23-0500	r3.8xlarge	Linux/UNIX	ap-northeast-1a
SPOTINSTANCEPRICE	0.706900	2015-03-25T20:42:46-0500	r3.8xlarge	Linux/UNIX	ap-northeast-1a
SPOTINSTANCEPRICE	0.684300	2015-03-25T20:30:42-0500	r3.8xlarge	Linux/UNIX	ap-northeast-1a
SPOTINSTANCEPRICE	0.647500	2015-03-25T20:25:34-0500	r3.8xlarge	Linux/UNIX	ap-northeast-1a
SPOTINSTANCEPRICE	0.665000	2015-03-25T20:23:50-0500	r3.8xlarge	Linux/UNIX	ap-northeast-1a
SPOTINSTANCEPRICE	0.647500	2015-03-25T20:22:07-0500	r3.8xlarge	Linux/UNIX	ap-northeast-1a
SPOTINSTANCEPRICE	0.617000	2015-03-25T20:01:21-0500	r3.8xlarge	Linux/UNIX	ap-northeast-1a
SPOTINSTANCEPRICE	0.603700	2015-03-25T19:57:55-0500	r3.8xlarge	Linux/UNIX	ap-northeast-1a
SPOTINSTANCEPRICE	0.610200	2015-03-25T19:54:30-0500	r3.8xlarge	Linux/UNIX	ap-northeast-1a
SPOTINSTANCEPRICE	0.617000	2015-03-25T19:52:46-0500	r3.8xlarge	Linux/UNIX	ap-northeast-1a
SPOTINSTANCEPRICE	0.624100	2015-03-25T19:51:03-0500	r3.8xlarge	Linux/UNIX	ap-northeast-1a
SPOTINSTANCEPRICE	0.639300	2015-03-25T19:44:12-0500	r3.8xlarge	Linux/UNIX	ap-northeast-1a
SPOTINSTANCEPRICE	0.631500	2015-03-25T19:40:46-0500	r3.8xlarge	Linux/UNIX	ap-northeast-1a
SPOTINSTANCEPRICE	0.617000	2015-03-25T19:37:20-0500	r3.8xlarge	Linux/UNIX	ap-northeast-1a
SPOTINSTANCEPRICE	0.603700	2015-03-25T19:33:53-0500	r3.8xlarge	Linux/UNIX	ap-northeast-1a
SPOTINSTANCEPRICE	0.587300	2015-03-25T19:32:10-0500	r3.8xlarge	Linux/UNIX	ap-northeast-1a
SPOTINSTANCEPRICE	0.581500	2015-03-25T19:30:27-0500	r3.8xlarge	Linux/UNIX	ap-northeast-1a
SPOTINSTANCEPRICE	0.575900	2015-03-25T19:23:36-0500	r3.8xlarge	Linux/UNIX	ap-northeast-1a
SPOTINSTANCEPRICE	0.581500	2015-03-25T19:18:26-0500	r3.8xlarge	Linux/UNIX	ap-northeast-1a
SPOTINSTANCEPRICE	0.587300	2015-03-25T19:16:44-0500	r3.8xlarge	Linux/UNIX	ap-northeast-1a
SPOTINSTANCEPRICE	0.581500	2015-03-25T19:13:17-0500	r3.8xlarge	Linux/UNIX	ap-northeast-1a
SPOTINSTANCEPRICE	0.570500	2015-03-25T19:06:26-0500	r3.8xlarge	Linux/UNIX	ap-northeast-1a
SPOTINSTANCEPRICE	0.575900	2015-03-25T19:04:43-0500	r3.8xlarge	Linux/UNIX	ap-northeast-1a
SPOTINSTANCEPRICE	0.581500	2015-03-25T18:50:57-0500	r3.8xlarge	Linux/UNIX	ap-northeast-1a
SPOTINSTANCEPRICE	0.593400	2015-03-25T18:49:15-0500	r3.8xlarge	Linux/UNIX	ap-northeast-1a
SPOTINSTANCEPRICE	0.575900	2015-03-25T18:42:26-0500	r3.8xlarge	Linux/UNIX	ap-northeast-1a
SPOTINSTANCEPRICE	0.570500	2015-03-25T18:25:13-0500	r3.8xlarge	Linux/UNIX	ap-northeast-1a
SPOTINSTANCEPRICE	0.581500	2015-03-25T18:21:48-0500	r3.8xlarge	Linux/UNIX	ap-northeast-1a
SPOTINSTANCEPRICE	0.587300	2015-03-25T18:18:18-0500	r3.8xlarge	Linux/UNIX	ap-northeast-1a
SPOTINSTANCEPRICE	0.593400	2015-03-25T18:16:35-0500	r3.8xlarge	Linux/UNIX	ap-northeast-1a
SPOTINSTANCEPRICE	0.587300	2015-03-25T18:09:41-0500	r3.8xlarge	Linux/UNIX	ap-northeast-1a
SPOTINSTANCEPRICE	0.575900	2015-03-25T18:06:13-0500	r3.8xlarge	Linux/UNIX	ap-northeast-1a
SPOTINSTANCEPRICE	0.570500	2015-03-25T18:01:03-0500	r3.8xlarge	Linux/UNIX	ap-northeast-1a
SPOTINSTANCEPRICE	0.580100	2015-03-25T17:59:17-0500	r3.8xlarge	Linux/UNIX	ap-northeast-1a
SPOTINSTANCEPRICE	0.591400	2015-03-25T17:57:34-0500	r3.8xlarge	Linux/UNIX	ap-northeast-1a
SPOTINSTANCEPRICE	0.603700	2015-03-25T17:52:26-0500	r3.8xlarge	Linux/UNIX	ap-northeast-1a
SPOTINSTANCEPRICE	0.617000	2015-03-25T17:42:08-0500	r3.8xlarge	Linux/UNIX	ap-northeast-1a
SPOTINSTANCEPRICE	0.603700	2015-03-25T17:36:59-0500	r3.8xlarge	Linux/UNIX	ap-northeast-1a
SPOTINSTANCEPRICE	0.591400	2015-03-25T17:17:58-0500	r3.8xlarge	Linux/UNIX	ap-northeast-1a
SPOTINSTANCEPRICE	0.597400	2015-03-25T17:16:15-0500	r3.8xlarge	Linux/UNIX	ap-northeast-1a
SPOTINSTANCEPRICE	0.603700	2015-03-25T17:14:30-0500	r3.8xlarge	Linux/UNIX	ap-northeast-1a
SPOTINSTANCEPRICE	0.597400	2015-03-25T17:04:10-0500	r3.8xlarge	Linux/UNIX	ap-northeast-1a
SPOTINSTANCEPRICE	0.591400	2015-03-25T16:57:18-0500	r3.8xlarge	Linux/UNIX	ap-northeast-1a
SPOTINSTANCEPRICE	0.603700	2015-03-25T16:55:34-0500	r3.8xlarge	Linux/UNIX	ap-northeast-1a
SPOTINSTANCEPRICE	0.610200	2015-03-25T16:53:51-0500	r3.8xlarge	Linux/UNIX	ap-northeast-1a
SPOTINSTANCEPRICE	0.591400	2015-03-25T16:07:32-0500	r3.8xlarge	Linux/UNIX	ap-northeast-1a
SPOTINSTANCEPRICE	0.607300	2015-03-25T16:04:07-0500	r3.8xlarge	Linux/UNIX	ap-northeast-1a
SPOTINSTANCEPRICE	0.591400	2015-03-25T16:02:23-0500	r3.8xlarge	Linux/UNIX	ap-northeast-1a
SPOTINSTANCEPRICE	0.597400	2015-03-25T16:00:41-0500	r3.8xlarge	Linux/UNIX	ap-northeast-1a
SPOTINSTANCEPRICE	0.591400	2015-03-25T15:12:29-0500	r3.8xlarge	Linux/UNIX	ap-northeast-1a
SPOTINSTANCEPRICE	0.613700	2015-03-25T15:07:20-0500	r3.8xlarge	Linux/UNIX	ap-northeast-1a
SPOTINSTANCEPRICE	0.601100	2015-03-25T15:02:10-0500	r3.8xlarge	Linux/UNIX	ap-northeast-1a
SPOTINSTANCEPRICE	0.585600	2015-03-25T15:00:25-0500	r3.8xlarge	Linux/UNIX	ap-northeast-1a
SPOTINSTANCEPRICE	0.591400	2015-03-25T14:58:42-0500	r3.8xlarge	Linux/UNIX	ap-northeast-1a
SPOTINSTANCEPRICE	0.597400	2015-03-25T14:46:46-0500	r3.8xlarge	Linux/UNIX	ap-northeast-1a
SPOTINSTANCEPRICE	0.603700	2015-03-25T14:43:19-0500	r3.8xlarge	Linux/UNIX	ap-northeast-1a
SPOTINSTANCEPRICE	0.570500	2015-03-25T14:41:36-0500	r3.8xlarge	Linux/UNIX	ap-northeast-1a
SPOTINSTANCEPRICE	0.565300	2015-03-25T14:19:21-0500	r3.8xlarge	Linux/UNIX	ap-northeast-1a
SPOTINSTANCEPRICE	0.580100	2015-03-25T14:15:56-0500	r3.8xlarge	Linux/UNIX	ap-northeast-1a
SPOTINSTANCEPRICE	0.591400	2015-03-25T14:07:22-0500	r3.8xlarge	Linux/UNIX	ap-northeast-1a
SPOTINSTANCEPRICE	0.603700	2015-03-25T14:05:39-0500	r3.8xlarge	Linux/UNIX	ap-northeast-1a
SPOTINSTANCEPRICE	0.617000	2015-03-25T13:57:03-0500	r3.8xlarge	Linux/UNIX	ap-northeast-1a
SPOTINSTANCEPRICE	0.603700	2015-03-25T13:53:37-0500	r3.8xlarge	Linux/UNIX	ap-northeast-1a
SPOTINSTANCEPRICE	0.597400	2015-03-25T13:51:55-0500	r3.8xlarge	Linux/UNIX	ap-northeast-1a
SPOTINSTANCEPRICE	0.617000	2015-03-25T13:48:30-0500	r3.8xlarge	Linux/UNIX	ap-northeast-1a
SPOTINSTANCEPRICE	0.603700	2015-03-25T13:39:59-0500	r3.8xlarge	Linux/UNIX	ap-northeast-1a
SPOTINSTANCEPRICE	0.597400	2015-03-25T13:36:34-0500	r3.8xlarge	Linux/UNIX	ap-northeast-1a
SPOTINSTANCEPRICE	0.647400	2015-03-25T13:34:51-0500	r3.8xlarge	Linux/UNIX	ap-northeast-1a
SPOTINSTANCEPRICE	0.655000	2015-03-25T13:31:23-0500	r3.8xlarge	Linux/UNIX	ap-northeast-1a
SPOTINSTANCEPRICE	0.637500	2015-03-25T13:29:39-0500	r3.8xlarge	Linux/UNIX	ap-northeast-1a
SPOTINSTANCEPRICE	0.630400	2015-03-25T13:24:30-0500	r3.8xlarge	Linux/UNIX	ap-northeast-1a
SPOTINSTANCEPRICE	0.647400	2015-03-25T13:22:47-0500	r3.8xlarge	Linux/UNIX	ap-northeast-1a
SPOTINSTANCEPRICE	0.663000	2015-03-25T13:17:39-0500	r3.8xlarge	Linux/UNIX	ap-northeast-1a
SPOTINSTANCEPRICE	0.640100	2015-03-25T12:51:58-0500	r3.8xlarge	Linux/UNIX	ap-northeast-1a
SPOTINSTANCEPRICE	0.663000	2015-03-25T12:41:42-0500	r3.8xlarge	Linux/UNIX	ap-northeast-1a
SPOTINSTANCEPRICE	0.647400	2015-03-25T12:38:17-0500	r3.8xlarge	Linux/UNIX	ap-northeast-1a
SPOTINSTANCEPRICE	0.671300	2015-03-25T12:36:35-0500	r3.8xlarge	Linux/UNIX	ap-northeast-1a
SPOTINSTANCEPRICE	0.663000	2015-03-25T12:34:52-0500	r3.8xlarge	Linux/UNIX	ap-northeast-1a
SPOTINSTANCEPRICE	0.640100	2015-03-25T12:31:30-0500	r3.8xlarge	Linux/UNIX	ap-northeast-1a
SPOTINSTANCEPRICE	0.655000	2015-03-25T12:22:55-0500	r3.8xlarge	Linux/UNIX	ap-northeast-1a
SPOTINSTANCEPRICE	0.587300	2015-03-25T12:21:12-0500	r3.8xlarge	Linux/UNIX	ap-northeast-1a
SPOTINSTANCEPRICE	0.575900	2015-03-25T12:16:07-0500	r3.8xlarge	Linux/UNIX	ap-northeast-1a
SPOTINSTANCEPRICE	0.565300	2015-03-25T12:10:59-0500	r3.8xlarge	Linux/UNIX	ap-northeast-1a
SPOTINSTANCEPRICE	0.575900	2015-03-25T12:05:53-0500	r3.8xlarge	Linux/UNIX	ap-northeast-1a
SPOTINSTANCEPRICE	0.565300	2015-03-25T11:55:38-0500	r3.8xlarge	Linux/UNIX	ap-northeast-1a
SPOTINSTANCEPRICE	0.570500	2015-03-25T11:45:25-0500	r3.8xlarge	Linux/UNIX	ap-northeast-1a
SPOTINSTANCEPRICE	0.575900	2015-03-25T11:23:17-0500	r3.8xlarge	Linux/UNIX	ap-northeast-1a
SPOTINSTANCEPRICE	0.581500	2015-03-25T11:21:35-0500	r3.8xlarge	Linux/UNIX	ap-northeast-1a
SPOTINSTANCEPRICE	0.587300	2015-03-25T11:16:29-0500	r3.8xlarge	Linux/UNIX	ap-northeast-1a
SPOTINSTANCEPRICE	0.593400	2015-03-25T11:14:44-0500	r3.8xlarge	Linux/UNIX	ap-northeast-1a
SPOTINSTANCEPRICE	0.599800	2015-03-25T11:13:02-0500	r3.8xlarge	Linux/UNIX	ap-northeast-1a
SPOTINSTANCEPRICE	0.593400	2015-03-25T11:09:38-0500	r3.8xlarge	Linux/UNIX	ap-northeast-1a
SPOTINSTANCEPRICE	0.587300	2015-03-25T11:07:57-0500	r3.8xlarge	Linux/UNIX	ap-northeast-1a
SPOTINSTANCEPRICE	0.593400	2015-03-25T11:06:13-0500	r3.8xlarge	Linux/UNIX	ap-northeast-1a
SPOTINSTANCEPRICE	0.599800	2015-03-25T10:23:29-0500	r3.8xlarge	Linux/UNIX	ap-northeast-1a
SPOTINSTANCEPRICE	0.575900	2015-03-25T10:16:40-0500	r3.8xlarge	Linux/UNIX	ap-northeast-1a
SPOTINSTANCEPRICE	0.587300	2015-03-25T10:06:22-0500	r3.8xlarge	Linux/UNIX	ap-northeast-1a
SPOTINSTANCEPRICE	0.599800	2015-03-25T10:01:13-0500	r3.8xlarge	Linux/UNIX	ap-northeast-1a
SPOTINSTANCEPRICE	0.575900	2015-03-25T09:59:27-0500	r3.8xlarge	Linux/UNIX	ap-northeast-1a
SPOTINSTANCEPRICE	0.593400	2015-03-25T09:57:46-0500	r3.8xlarge	Linux/UNIX	ap-northeast-1a
SPOTINSTANCEPRICE	0.599800	2015-03-25T09:56:02-0500	r3.8xlarge	Linux/UNIX	ap-northeast-1a
SPOTINSTANCEPRICE	0.593400	2015-03-25T09:52:37-0500	r3.8xlarge	Linux/UNIX	ap-northeast-1a
SPOTINSTANCEPRICE	0.581500	2015-03-25T09:49:12-0500	r3.8xlarge	Linux/UNIX	ap-northeast-1a
SPOTINSTANCEPRICE	0.587300	2015-03-25T09:11:37-0500	r3.8xlarge	Linux/UNIX	ap-northeast-1a
SPOTINSTANCEPRICE	0.599800	2015-03-25T09:01:22-0500	r3.8xlarge	Linux/UNIX	ap-northeast-1a
SPOTINSTANCEPRICE	0.613300	2015-03-25T08:56:15-0500	r3.8xlarge	Linux/UNIX	ap-northeast-1a
SPOTINSTANCEPRICE	0.606400	2015-03-25T08:54:32-0500	r3.8xlarge	Linux/UNIX	ap-northeast-1a
SPOTINSTANCEPRICE	0.587300	2015-03-25T08:52:52-0500	r3.8xlarge	Linux/UNIX	ap-northeast-1a
SPOTINSTANCEPRICE	0.593400	2015-03-25T08:39:14-0500	r3.8xlarge	Linux/UNIX	ap-northeast-1a
SPOTINSTANCEPRICE	0.606400	2015-03-25T08:25:35-0500	r3.8xlarge	Linux/UNIX	ap-northeast-1a
SPOTINSTANCEPRICE	0.613300	2015-03-25T08:22:12-0500	r3.8xlarge	Linux/UNIX	ap-northeast-1a
SPOTINSTANCEPRICE	0.593400	2015-03-25T08:18:46-0500	r3.8xlarge	Linux/UNIX	ap-northeast-1a
SPOTINSTANCEPRICE	0.620500	2015-03-25T08:17:06-0500	r3.8xlarge	Linux/UNIX	ap-northeast-1a
SPOTINSTANCEPRICE	0.636100	2015-03-25T08:15:19-0500	r3.8xlarge	Linux/UNIX	ap-northeast-1a
SPOTINSTANCEPRICE	0.628100	2015-03-25T08:05:07-0500	r3.8xlarge	Linux/UNIX	ap-northeast-1a
SPOTINSTANCEPRICE	0.644400	2015-03-25T08:03:24-0500	r3.8xlarge	Linux/UNIX	ap-northeast-1a
SPOTINSTANCEPRICE	0.662300	2015-03-25T07:51:29-0500	r3.8xlarge	Linux/UNIX	ap-northeast-1a
SPOTINSTANCEPRICE	0.692900	2015-03-25T07:49:46-0500	r3.8xlarge	Linux/UNIX	ap-northeast-1a
SPOTINSTANCEPRICE	0.716300	2015-03-25T07:46:20-0500	r3.8xlarge	Linux/UNIX	ap-northeast-1a
SPOTINSTANCEPRICE	0.682200	2015-03-25T07:32:39-0500	r3.8xlarge	Linux/UNIX	ap-northeast-1a
SPOTINSTANCEPRICE	0.692900	2015-03-25T06:58:26-0500	r3.8xlarge	Linux/UNIX	ap-northeast-1a
SPOTINSTANCEPRICE	0.682200	2015-03-25T06:36:16-0500	r3.8xlarge	Linux/UNIX	ap-northeast-1a
SPOTINSTANCEPRICE	0.692900	2015-03-25T06:34:33-0500	r3.8xlarge	Linux/UNIX	ap-northeast-1a
SPOTINSTANCEPRICE	0.682200	2015-03-25T05:44:50-0500	r3.8xlarge	Linux/UNIX	ap-northeast-1a
SPOTINSTANCEPRICE	0.692900	2015-03-25T05:43:08-0500	r3.8xlarge	Linux/UNIX	ap-northeast-1a
SPOTINSTANCEPRICE	0.682200	2015-03-25T05:37:59-0500	r3.8xlarge	Linux/UNIX	ap-northeast-1a
SPOTINSTANCEPRICE	0.692900	2015-03-25T05:36:15-0500	r3.8xlarge	Linux/UNIX	ap-northeast-1a
SPOTINSTANCEPRICE	0.704300	2015-03-25T05:24:14-0500	r3.8xlarge	Linux/UNIX	ap-northeast-1a
SPOTINSTANCEPRICE	0.729100	2015-03-25T05:20:46-0500	r3.8xlarge	Linux/UNIX	ap-northeast-1a
SPOTINSTANCEPRICE	0.692900	2015-03-25T05:15:39-0500	r3.8xlarge	Linux/UNIX	ap-northeast-1a
SPOTINSTANCEPRICE	0.704300	2015-03-25T05:13:52-0500	r3.8xlarge	Linux/UNIX	ap-northeast-1a
SPOTINSTANCEPRICE	0.692900	2015-03-25T04:21:27-0500	r3.8xlarge	Linux/UNIX	ap-northeast-1a
SPOTINSTANCEPRICE	0.704300	2015-03-25T04:19:43-0500	r3.8xlarge	Linux/UNIX	ap-northeast-1a
SPOTINSTANCEPRICE	0.692900	2015-03-25T04:11:04-0500	r3.8xlarge	Linux/UNIX	ap-northeast-1a
SPOTINSTANCEPRICE	0.704300	2015-03-25T03:51:56-0500	r3.8xlarge	Linux/UNIX	ap-northeast-1a
SPOTINSTANCEPRICE	0.692900	2015-03-25T03:39:42-0500	r3.8xlarge	Linux/UNIX	ap-northeast-1a
SPOTINSTANCEPRICE	0.704300	2015-03-25T03:37:58-0500	r3.8xlarge	Linux/UNIX	ap-northeast-1a
SPOTINSTANCEPRICE	0.692900	2015-03-25T03:31:04-0500	r3.8xlarge	Linux/UNIX	ap-northeast-1a
SPOTINSTANCEPRICE	0.717300	2015-03-25T03:27:35-0500	r3.8xlarge	Linux/UNIX	ap-northeast-1a
SPOTINSTANCEPRICE	0.729600	2015-03-25T03:18:54-0500	r3.8xlarge	Linux/UNIX	ap-northeast-1a
SPOTINSTANCEPRICE	0.742600	2015-03-25T03:15:24-0500	r3.8xlarge	Linux/UNIX	ap-northeast-1a
SPOTINSTANCEPRICE	0.756500	2015-03-25T03:05:03-0500	r3.8xlarge	Linux/UNIX	ap-northeast-1a
SPOTINSTANCEPRICE	0.742600	2015-03-25T03:01:34-0500	r3.8xlarge	Linux/UNIX	ap-northeast-1a
SPOTINSTANCEPRICE	0.786800	2015-03-25T02:58:04-0500	r3.8xlarge	Linux/UNIX	ap-northeast-1a
SPOTINSTANCEPRICE	0.742600	2015-03-25T02:54:36-0500	r3.8xlarge	Linux/UNIX	ap-northeast-1a
SPOTINSTANCEPRICE	0.729600	2015-03-25T02:42:28-0500	r3.8xlarge	Linux/UNIX	ap-northeast-1a
SPOTINSTANCEPRICE	0.771100	2015-03-25T02:39:01-0500	r3.8xlarge	Linux/UNIX	ap-northeast-1a
SPOTINSTANCEPRICE	0.729600	2015-03-25T02:13:00-0500	r3.8xlarge	Linux/UNIX	ap-northeast-1a
SPOTINSTANCEPRICE	0.889500	2015-03-25T02:09:29-0500	r3.8xlarge	Linux/UNIX	ap-northeast-1a
SPOTINSTANCEPRICE	0.857800	2015-03-25T02:07:45-0500	r3.8xlarge	Linux/UNIX	ap-northeast-1a
SPOTINSTANCEPRICE	0.840100	2015-03-25T01:55:39-0500	r3.8xlarge	Linux/UNIX	ap-northeast-1a
SPOTINSTANCEPRICE	0.870400	2015-03-25T01:48:44-0500	r3.8xlarge	Linux/UNIX	ap-northeast-1a
SPOTINSTANCEPRICE	0.889500	2015-03-25T01:45:17-0500	r3.8xlarge	Linux/UNIX	ap-northeast-1a
SPOTINSTANCEPRICE	0.909900	2015-03-25T01:40:06-0500	r3.8xlarge	Linux/UNIX	ap-northeast-1a
SPOTINSTANCEPRICE	0.931800	2015-03-25T01:34:57-0500	r3.8xlarge	Linux/UNIX	ap-northeast-1a
SPOTINSTANCEPRICE	0.955200	2015-03-25T01:33:13-0500	r3.8xlarge	Linux/UNIX	ap-northeast-1a
SPOTINSTANCEPRICE	0.931800	2015-03-25T01:28:01-0500	r3.8xlarge	Linux/UNIX	ap-northeast-1a
SPOTINSTANCEPRICE	0.980400	2015-03-25T01:17:38-0500	r3.8xlarge	Linux/UNIX	ap-northeast-1a
SPOTINSTANCEPRICE	1.007600	2015-03-25T01:15:55-0500	r3.8xlarge	Linux/UNIX	ap-northeast-1a
SPOTINSTANCEPRICE	0.931800	2015-03-25T01:12:28-0500	r3.8xlarge	Linux/UNIX	ap-northeast-1a
SPOTINSTANCEPRICE	0.909900	2015-03-25T00:58:39-0500	r3.8xlarge	Linux/UNIX	ap-northeast-1a
SPOTINSTANCEPRICE	0.931800	2015-03-25T00:55:12-0500	r3.8xlarge	Linux/UNIX	ap-northeast-1a
SPOTINSTANCEPRICE	0.909900	2015-03-25T00:46:28-0500	r3.8xlarge	Linux/UNIX	ap-northeast-1a
SPOTINSTANCEPRICE	0.955200	2015-03-25T00:42:59-0500	r3.8xlarge	Linux/UNIX	ap-northeast-1a
SPOTINSTANCEPRICE	1.169700	2015-03-25T00:41:16-0500	r3.8xlarge	Linux/UNIX	ap-northeast-1a
SPOTINSTANCEPRICE	1.200000	2015-03-25T00:37:50-0500	r3.8xlarge	Linux/UNIX	ap-northeast-1a
SPOTINSTANCEPRICE	1.157400	2015-03-25T00:34:20-0500	r3.8xlarge	Linux/UNIX	ap-northeast-1a
SPOTINSTANCEPRICE	1.121900	2015-03-25T00:30:55-0500	r3.8xlarge	Linux/UNIX	ap-northeast-1a
SPOTINSTANCEPRICE	1.059000	2015-03-25T00:23:57-0500	r3.8xlarge	Linux/UNIX	ap-northeast-1a
SPOTINSTANCEPRICE	1.019000	2015-03-25T00:18:45-0500	r3.8xlarge	Linux/UNIX	ap-northeast-1a
SPOTINSTANCEPRICE	1.059000	2015-03-25T00:15:16-0500	r3.8xlarge	Linux/UNIX	ap-northeast-1a
SPOTINSTANCEPRICE	1.019000	2015-03-25T00:01:27-0500	r3.8xlarge	Linux/UNIX	ap-northeast-1a
SPOTINSTANCEPRICE	1.101200	2015-03-24T23:59:41-0500	r3.8xlarge	Linux/UNIX	ap-northeast-1a
SPOTINSTANCEPRICE	1.169700	2015-03-24T23:57:57-0500	r3.8xlarge	Linux/UNIX	ap-northeast-1a
SPOTINSTANCEPRICE	1.200000	2015-03-24T22:38:01-0500	r3.8xlarge	Linux/UNIX	ap-northeast-1a
SPOTINSTANCEPRICE	0.728300	2015-03-24T22:36:16-0500	r3.8xlarge	Linux/UNIX	ap-northeast-1a
SPOTINSTANCEPRICE	0.704300	2015-03-24T22:31:03-0500	r3.8xlarge	Linux/UNIX	ap-northeast-1a
SPOTINSTANCEPRICE	0.716300	2015-03-24T21:47:30-0500	r3.8xlarge	Linux/UNIX	ap-northeast-1a
SPOTINSTANCEPRICE	0.653100	2015-03-24T21:42:16-0500	r3.8xlarge	Linux/UNIX	ap-northeast-1a
SPOTINSTANCEPRICE	0.674400	2015-03-24T21:40:29-0500	r3.8xlarge	Linux/UNIX	ap-northeast-1a
SPOTINSTANCEPRICE	0.631500	2015-03-24T21:38:41-0500	r3.8xlarge	Linux/UNIX	ap-northeast-1a
SPOTINSTANCEPRICE	0.639300	2015-03-24T21:35:13-0500	r3.8xlarge	Linux/UNIX	ap-northeast-1a
SPOTINSTANCEPRICE	0.620500	2015-03-24T21:33:28-0500	r3.8xlarge	Linux/UNIX	ap-northeast-1a
SPOTINSTANCEPRICE	0.613300	2015-03-24T21:29:56-0500	r3.8xlarge	Linux/UNIX	ap-northeast-1a
SPOTINSTANCEPRICE	0.593400	2015-03-24T20:50:09-0500	r3.8xlarge	Linux/UNIX	ap-northeast-1a
SPOTINSTANCEPRICE	0.599800	2015-03-24T20:48:27-0500	r3.8xlarge	Linux/UNIX	ap-northeast-1a
SPOTINSTANCEPRICE	0.617000	2015-03-24T20:46:45-0500	r3.8xlarge	Linux/UNIX	ap-northeast-1a
SPOTINSTANCEPRICE	0.624100	2015-03-24T20:36:23-0500	r3.8xlarge	Linux/UNIX	ap-northeast-1a
SPOTINSTANCEPRICE	0.610200	2015-03-24T20:29:30-0500	r3.8xlarge	Linux/UNIX	ap-northeast-1a
SPOTINSTANCEPRICE	0.617000	2015-03-24T20:26:03-0500	r3.8xlarge	Linux/UNIX	ap-northeast-1a
SPOTINSTANCEPRICE	0.603700	2015-03-24T20:22:36-0500	r3.8xlarge	Linux/UNIX	ap-northeast-1a
SPOTINSTANCEPRICE	0.587300	2015-03-24T20:17:27-0500	r3.8xlarge	Linux/UNIX	ap-northeast-1a
SPOTINSTANCEPRICE	0.581500	2015-03-24T20:15:44-0500	r3.8xlarge	Linux/UNIX	ap-northeast-1a
SPOTINSTANCEPRICE	0.599800	2015-03-24T20:12:17-0500	r3.8xlarge	Linux/UNIX	ap-northeast-1a
SPOTINSTANCEPRICE	0.575900	2015-03-24T20:00:13-0500	r3.8xlarge	Linux/UNIX	ap-northeast-1a
SPOTINSTANCEPRICE	0.565300	2015-03-24T19:49:46-0500	r3.8xlarge	Linux/UNIX	ap-northeast-1a
SPOTINSTANCEPRICE	0.570500	2015-03-24T19:48:03-0500	r3.8xlarge	Linux/UNIX	ap-northeast-1a
SPOTINSTANCEPRICE	0.565300	2015-03-24T19:32:36-0500	r3.8xlarge	Linux/UNIX	ap-northeast-1a
SPOTINSTANCEPRICE	0.550800	2015-03-24T19:30:55-0500	r3.8xlarge	Linux/UNIX	ap-northeast-1a
SPOTINSTANCEPRICE	0.541700	2015-03-24T19:29:10-0500	r3.8xlarge	Linux/UNIX	ap-northeast-1a
SPOTINSTANCEPRICE	0.546200	2015-03-24T19:27:27-0500	r3.8xlarge	Linux/UNIX	ap-northeast-1a
SPOTINSTANCEPRICE	0.541700	2015-03-24T19:22:17-0500	r3.8xlarge	Linux/UNIX	ap-northeast-1a
SPOTINSTANCEPRICE	0.546200	2015-03-24T19:20:35-0500	r3.8xlarge	Linux/UNIX	ap-northeast-1a
SPOTINSTANCEPRICE	0.541700	2015-03-24T18:51:06-0500	r3.8xlarge	Linux/UNIX	ap-northeast-1a
SPOTINSTANCEPRICE	0.537400	2015-03-24T18:16:27-0500	r3.8xlarge	Linux/UNIX	ap-northeast-1a
SPOTINSTANCEPRICE	0.546200	2015-03-24T18:09:30-0500	r3.8xlarge	Linux/UNIX	ap-northeast-1a
SPOTINSTANCEPRICE	0.550800	2015-03-24T18:07:48-0500	r3.8xlarge	Linux/UNIX	ap-northeast-1a
SPOTINSTANCEPRICE	0.546200	2015-03-24T18:00:55-0500	r3.8xlarge	Linux/UNIX	ap-northeast-1a
SPOTINSTANCEPRICE	0.546500	2015-03-24T17:55:42-0500	r3.8xlarge	Linux/UNIX	ap-northeast-1a
SPOTINSTANCEPRICE	0.555500	2015-03-24T17:38:19-0500	r3.8xlarge	Linux/UNIX	ap-northeast-1a
SPOTINSTANCEPRICE	0.560300	2015-03-24T17:31:28-0500	r3.8xlarge	Linux/UNIX	ap-northeast-1a
SPOTINSTANCEPRICE	0.555500	2015-03-24T16:29:41-0500	r3.8xlarge	Linux/UNIX	ap-northeast-1a
SPOTINSTANCEPRICE	0.565300	2015-03-24T16:19:21-0500	r3.8xlarge	Linux/UNIX	ap-northeast-1a
SPOTINSTANCEPRICE	0.570500	2015-03-24T16:14:08-0500	r3.8xlarge	Linux/UNIX	ap-northeast-1a
SPOTINSTANCEPRICE	0.555500	2015-03-24T16:10:37-0500	r3.8xlarge	Linux/UNIX	ap-northeast-1a
SPOTINSTANCEPRICE	0.550900	2015-03-24T16:07:08-0500	r3.8xlarge	Linux/UNIX	ap-northeast-1a
SPOTINSTANCEPRICE	0.564700	2015-03-24T16:05:22-0500	r3.8xlarge	Linux/UNIX	ap-northeast-1a
SPOTINSTANCEPRICE	0.574800	2015-03-24T16:01:52-0500	r3.8xlarge	Linux/UNIX	ap-northeast-1a
SPOTINSTANCEPRICE	0.565300	2015-03-24T15:58:21-0500	r3.8xlarge	Linux/UNIX	ap-northeast-1a
SPOTINSTANCEPRICE	0.560300	2015-03-24T15:47:43-0500	r3.8xlarge	Linux/UNIX	ap-northeast-1a
SPOTINSTANCEPRICE	0.550900	2015-03-24T15:39:08-0500	r3.8xlarge	Linux/UNIX	ap-northeast-1a
SPOTINSTANCEPRICE	0.555500	2015-03-24T15:37:25-0500	r3.8xlarge	Linux/UNIX	ap-northeast-1a
SPOTINSTANCEPRICE	0.550900	2015-03-24T15:34:00-0500	r3.8xlarge	Linux/UNIX	ap-northeast-1a
SPOTINSTANCEPRICE	0.555500	2015-03-24T15:32:18-0500	r3.8xlarge	Linux/UNIX	ap-northeast-1a
SPOTINSTANCEPRICE	0.550900	2015-03-24T15:16:55-0500	r3.8xlarge	Linux/UNIX	ap-northeast-1a
SPOTINSTANCEPRICE	0.555500	2015-03-24T15:13:29-0500	r3.8xlarge	Linux/UNIX	ap-northeast-1a
SPOTINSTANCEPRICE	0.550900	2015-03-24T15:03:10-0500	r3.8xlarge	Linux/UNIX	ap-northeast-1a
SPOTINSTANCEPRICE	0.555500	2015-03-24T15:01:27-0500	r3.8xlarge	Linux/UNIX	ap-northeast-1a
SPOTINSTANCEPRICE	0.550900	2015-03-24T14:42:41-0500	r3.8xlarge	Linux/UNIX	ap-northeast-1a
SPOTINSTANCEPRICE	0.537400	2015-03-24T14:40:59-0500	r3.8xlarge	Linux/UNIX	ap-northeast-1a
SPOTINSTANCEPRICE	0.533200	2015-03-24T14:23:54-0500	r3.8xlarge	Linux/UNIX	ap-northeast-1a
SPOTINSTANCEPRICE	0.541700	2015-03-24T14:22:12-0500	r3.8xlarge	Linux/UNIX	ap-northeast-1a
SPOTINSTANCEPRICE	0.546200	2015-03-24T14:20:30-0500	r3.8xlarge	Linux/UNIX	ap-northeast-1a
SPOTINSTANCEPRICE	0.541700	2015-03-24T14:17:06-0500	r3.8xlarge	Linux/UNIX	ap-northeast-1a
SPOTINSTANCEPRICE	0.546200	2015-03-24T14:15:23-0500	r3.8xlarge	Linux/UNIX	ap-northeast-1a
SPOTINSTANCEPRICE	0.541700	2015-03-24T14:13:41-0500	r3.8xlarge	Linux/UNIX	ap-northeast-1a
SPOTINSTANCEPRICE	0.546200	2015-03-24T14:06:52-0500	r3.8xlarge	Linux/UNIX	ap-northeast-1a
SPOTINSTANCEPRICE	0.533200	2015-03-24T13:59:58-0500	r3.8xlarge	Linux/UNIX	ap-northeast-1a
SPOTINSTANCEPRICE	0.546500	2015-03-24T13:58:16-0500	r3.8xlarge	Linux/UNIX	ap-northeast-1a
SPOTINSTANCEPRICE	0.555500	2015-03-24T13:42:52-0500	r3.8xlarge	Linux/UNIX	ap-northeast-1a
SPOTINSTANCEPRICE	0.569600	2015-03-24T13:24:04-0500	r3.8xlarge	Linux/UNIX	ap-northeast-1a
SPOTINSTANCEPRICE	0.584000	2015-03-24T13:18:55-0500	r3.8xlarge	Linux/UNIX	ap-northeast-1a
SPOTINSTANCEPRICE	0.613700	2015-03-24T13:17:12-0500	r3.8xlarge	Linux/UNIX	ap-northeast-1a
SPOTINSTANCEPRICE	0.633100	2015-03-24T13:13:45-0500	r3.8xlarge	Linux/UNIX	ap-northeast-1a
SPOTINSTANCEPRICE	0.616900	2015-03-24T13:10:17-0500	r3.8xlarge	Linux/UNIX	ap-northeast-1a
SPOTINSTANCEPRICE	0.610600	2015-03-24T12:44:32-0500	r3.8xlarge	Linux/UNIX	ap-northeast-1a
SPOTINSTANCEPRICE	0.604500	2015-03-24T12:42:49-0500	r3.8xlarge	Linux/UNIX	ap-northeast-1a
SPOTINSTANCEPRICE	0.616900	2015-03-24T12:41:00-0500	r3.8xlarge	Linux/UNIX	ap-northeast-1a
SPOTINSTANCEPRICE	0.610600	2015-03-24T12:32:29-0500	r3.8xlarge	Linux/UNIX	ap-northeast-1a
SPOTINSTANCEPRICE	0.598700	2015-03-24T12:27:20-0500	r3.8xlarge	Linux/UNIX	ap-northeast-1a
SPOTINSTANCEPRICE	0.593100	2015-03-24T12:23:55-0500	r3.8xlarge	Linux/UNIX	ap-northeast-1a
SPOTINSTANCEPRICE	0.541700	2015-03-24T12:20:30-0500	r3.8xlarge	Linux/UNIX	ap-northeast-1a
SPOTINSTANCEPRICE	0.533200	2015-03-24T12:11:54-0500	r3.8xlarge	Linux/UNIX	ap-northeast-1a
SPOTINSTANCEPRICE	0.537400	2015-03-24T12:03:20-0500	r3.8xlarge	Linux/UNIX	ap-northeast-1a
SPOTINSTANCEPRICE	0.533200	2015-03-24T11:54:43-0500	r3.8xlarge	Linux/UNIX	ap-northeast-1a
SPOTINSTANCEPRICE	0.537400	2015-03-24T11:49:35-0500	r3.8xlarge	Linux/UNIX	ap-northeast-1a
SPOTINSTANCEPRICE	0.541700	2015-03-24T10:30:38-0500	r3.8xlarge	Linux/UNIX	ap-northeast-1a
SPOTINSTANCEPRICE	0.550800	2015-03-24T10:28:52-0500	r3.8xlarge	Linux/UNIX	ap-northeast-1a
SPOTINSTANCEPRICE	0.555700	2015-03-24T10:27:10-0500	r3.8xlarge	Linux/UNIX	ap-northeast-1a
SPOTINSTANCEPRICE	0.565900	2015-03-24T10:25:26-0500	r3.8xlarge	Linux/UNIX	ap-northeast-1a
SPOTINSTANCEPRICE	0.582900	2015-03-24T10:13:22-0500	r3.8xlarge	Linux/UNIX	ap-northeast-1a
SPOTINSTANCEPRICE	0.565900	2015-03-24T09:49:19-0500	r3.8xlarge	Linux/UNIX	ap-northeast-1a
SPOTINSTANCEPRICE	0.571400	2015-03-24T09:47:36-0500	r3.8xlarge	Linux/UNIX	ap-northeast-1a
SPOTINSTANCEPRICE	0.565900	2015-03-24T09:32:00-0500	r3.8xlarge	Linux/UNIX	ap-northeast-1a
SPOTINSTANCEPRICE	0.577000	2015-03-24T09:28:32-0500	r3.8xlarge	Linux/UNIX	ap-northeast-1a
SPOTINSTANCEPRICE	0.571400	2015-03-24T09:21:41-0500	r3.8xlarge	Linux/UNIX	ap-northeast-1a
SPOTINSTANCEPRICE	0.577000	2015-03-24T09:11:19-0500	r3.8xlarge	Linux/UNIX	ap-northeast-1a
SPOTINSTANCEPRICE	0.565900	2015-03-24T08:59:16-0500	r3.8xlarge	Linux/UNIX	ap-northeast-1a
SPOTINSTANCEPRICE	0.571400	2015-03-24T08:42:04-0500	r3.8xlarge	Linux/UNIX	ap-northeast-1a
SPOTINSTANCEPRICE	0.577000	2015-03-24T08:33:30-0500	r3.8xlarge	Linux/UNIX	ap-northeast-1a
SPOTINSTANCEPRICE	0.582900	2015-03-24T08:26:36-0500	r3.8xlarge	Linux/UNIX	ap-northeast-1a
SPOTINSTANCEPRICE	0.602200	2015-03-24T08:19:45-0500	r3.8xlarge	Linux/UNIX	ap-northeast-1a
SPOTINSTANCEPRICE	0.595500	2015-03-24T08:16:20-0500	r3.8xlarge	Linux/UNIX	ap-northeast-1a
SPOTINSTANCEPRICE	0.589100	2015-03-24T08:11:10-0500	r3.8xlarge	Linux/UNIX	ap-northeast-1a
SPOTINSTANCEPRICE	0.595500	2015-03-24T08:06:01-0500	r3.8xlarge	Linux/UNIX	ap-northeast-1a
SPOTINSTANCEPRICE	0.577000	2015-03-24T08:04:18-0500	r3.8xlarge	Linux/UNIX	ap-northeast-1a
SPOTINSTANCEPRICE	0.589100	2015-03-24T08:02:34-0500	r3.8xlarge	Linux/UNIX	ap-northeast-1a
SPOTINSTANCEPRICE	0.595500	2015-03-24T07:57:21-0500	r3.8xlarge	Linux/UNIX	ap-northeast-1a
SPOTINSTANCEPRICE	0.589100	2015-03-24T07:45:13-0500	r3.8xlarge	Linux/UNIX	ap-northeast-1a
SPOTINSTANCEPRICE	0.595500	2015-03-24T07:38:22-0500	r3.8xlarge	Linux/UNIX	ap-northeast-1a
SPOTINSTANCEPRICE	0.589100	2015-03-24T07:28:02-0500	r3.8xlarge	Linux/UNIX	ap-northeast-1a
SPOTINSTANCEPRICE	0.595500	2015-03-24T07:24:34-0500	r3.8xlarge	Linux/UNIX	ap-northeast-1a
SPOTINSTANCEPRICE	0.602200	2015-03-24T07:02:13-0500	r3.8xlarge	Linux/UNIX	ap-northeast-1a
SPOTINSTANCEPRICE	0.649900	2015-03-24T06:55:18-0500	r3.8xlarge	Linux/UNIX	ap-northeast-1a
SPOTINSTANCEPRICE	0.659400	2015-03-24T06:02:10-0500	r3.8xlarge	Linux/UNIX	ap-northeast-1a
SPOTINSTANCEPRICE	0.649900	2015-03-24T06:00:23-0500	r3.8xlarge	Linux/UNIX	ap-northeast-1a
SPOTINSTANCEPRICE	0.659400	2015-03-24T05:55:15-0500	r3.8xlarge	Linux/UNIX	ap-northeast-1a
SPOTINSTANCEPRICE	0.669300	2015-03-24T05:38:04-0500	r3.8xlarge	Linux/UNIX	ap-northeast-1a
SPOTINSTANCEPRICE	0.679800	2015-03-24T05:17:23-0500	r3.8xlarge	Linux/UNIX	ap-northeast-1a
SPOTINSTANCEPRICE	0.715100	2015-03-24T05:13:50-0500	r3.8xlarge	Linux/UNIX	ap-northeast-1a
SPOTINSTANCEPRICE	0.679800	2015-03-24T04:49:15-0500	r3.8xlarge	Linux/UNIX	ap-northeast-1a
SPOTINSTANCEPRICE	0.690900	2015-03-24T04:43:59-0500	r3.8xlarge	Linux/UNIX	ap-northeast-1a
SPOTINSTANCEPRICE	0.679800	2015-03-24T04:33:34-0500	r3.8xlarge	Linux/UNIX	ap-northeast-1a
SPOTINSTANCEPRICE	0.690900	2015-03-24T04:31:49-0500	r3.8xlarge	Linux/UNIX	ap-northeast-1a
SPOTINSTANCEPRICE	0.679800	2015-03-24T03:51:20-0500	r3.8xlarge	Linux/UNIX	ap-northeast-1a
SPOTINSTANCEPRICE	0.702600	2015-03-24T03:47:51-0500	r3.8xlarge	Linux/UNIX	ap-northeast-1a
SPOTINSTANCEPRICE	0.679800	2015-03-24T03:35:38-0500	r3.8xlarge	Linux/UNIX	ap-northeast-1a
SPOTINSTANCEPRICE	0.616600	2015-03-24T03:33:52-0500	r3.8xlarge	Linux/UNIX	ap-northeast-1a
SPOTINSTANCEPRICE	0.624400	2015-03-24T03:32:09-0500	r3.8xlarge	Linux/UNIX	ap-northeast-1a
SPOTINSTANCEPRICE	0.616600	2015-03-24T03:23:17-0500	r3.8xlarge	Linux/UNIX	ap-northeast-1a
SPOTINSTANCEPRICE	0.609300	2015-03-24T03:05:39-0500	r3.8xlarge	Linux/UNIX	ap-northeast-1a
SPOTINSTANCEPRICE	0.616600	2015-03-24T03:02:06-0500	r3.8xlarge	Linux/UNIX	ap-northeast-1a
SPOTINSTANCEPRICE	0.609300	2015-03-24T03:00:17-0500	r3.8xlarge	Linux/UNIX	ap-northeast-1a
SPOTINSTANCEPRICE	0.644400	2015-03-24T02:44:27-0500	r3.8xlarge	Linux/UNIX	ap-northeast-1a
SPOTINSTANCEPRICE	0.662300	2015-03-24T02:42:42-0500	r3.8xlarge	Linux/UNIX	ap-northeast-1a
SPOTINSTANCEPRICE	0.644400	2015-03-24T02:09:10-0500	r3.8xlarge	Linux/UNIX	ap-northeast-1a
SPOTINSTANCEPRICE	0.653100	2015-03-24T02:02:10-0500	r3.8xlarge	Linux/UNIX	ap-northeast-1a
SPOTINSTANCEPRICE	0.662300	2015-03-24T02:00:23-0500	r3.8xlarge	Linux/UNIX	ap-northeast-1a
SPOTINSTANCEPRICE	0.653100	2015-03-24T01:58:38-0500	r3.8xlarge	Linux/UNIX	ap-northeast-1a
SPOTINSTANCEPRICE	0.672000	2015-03-24T01:49:53-0500	r3.8xlarge	Linux/UNIX	ap-northeast-1a
SPOTINSTANCEPRICE	0.662300	2015-03-24T01:48:08-0500	r3.8xlarge	Linux/UNIX	ap-northeast-1a
SPOTINSTANCEPRICE	0.718100	2015-03-24T01:46:23-0500	r3.8xlarge	Linux/UNIX	ap-northeast-1a
SPOTINSTANCEPRICE	0.706900	2015-03-24T01:44:35-0500	r3.8xlarge	Linux/UNIX	ap-northeast-1a
SPOTINSTANCEPRICE	0.852500	2015-03-24T01:41:07-0500	r3.8xlarge	Linux/UNIX	ap-northeast-1a
SPOTINSTANCEPRICE	0.823500	2015-03-24T01:39:22-0500	r3.8xlarge	Linux/UNIX	ap-northeast-1a
SPOTINSTANCEPRICE	0.807800	2015-03-24T00:55:54-0500	r3.8xlarge	Linux/UNIX	ap-northeast-1a
SPOTINSTANCEPRICE	0.840100	2015-03-24T00:50:44-0500	r3.8xlarge	Linux/UNIX	ap-northeast-1a
SPOTINSTANCEPRICE	0.807800	2015-03-24T00:49:00-0500	r3.8xlarge	Linux/UNIX	ap-northeast-1a
SPOTINSTANCEPRICE	0.823500	2015-03-24T00:47:17-0500	r3.8xlarge	Linux/UNIX	ap-northeast-1a
SPOTINSTANCEPRICE	0.807800	2015-03-24T00:29:56-0500	r3.8xlarge	Linux/UNIX	ap-northeast-1a
SPOTINSTANCEPRICE	0.958200	2015-03-24T00:26:27-0500	r3.8xlarge	Linux/UNIX	ap-northeast-1a
SPOTINSTANCEPRICE	1.089200	2015-03-24T00:23:00-0500	r3.8xlarge	Linux/UNIX	ap-northeast-1a
SPOTINSTANCEPRICE	1.046800	2015-03-24T00:21:17-0500	r3.8xlarge	Linux/UNIX	ap-northeast-1a
SPOTINSTANCEPRICE	1.019000	2015-03-24T00:07:24-0500	r3.8xlarge	Linux/UNIX	ap-northeast-1a
SPOTINSTANCEPRICE	1.101200	2015-03-24T00:02:14-0500	r3.8xlarge	Linux/UNIX	ap-northeast-1a
SPOTINSTANCEPRICE	1.169700	2015-03-23T23:31:09-0500	r3.8xlarge	Linux/UNIX	ap-northeast-1a
SPOTINSTANCEPRICE	1.200000	2015-03-23T22:47:53-0500	r3.8xlarge	Linux/UNIX	ap-northeast-1a
SPOTINSTANCEPRICE	1.049300	2015-03-23T22:42:41-0500	r3.8xlarge	Linux/UNIX	ap-northeast-1a
SPOTINSTANCEPRICE	1.024600	2015-03-23T22:39:11-0500	r3.8xlarge	Linux/UNIX	ap-northeast-1a
SPOTINSTANCEPRICE	0.632500	2015-03-23T22:37:29-0500	r3.8xlarge	Linux/UNIX	ap-northeast-1a
SPOTINSTANCEPRICE	0.653100	2015-03-23T22:35:45-0500	r3.8xlarge	Linux/UNIX	ap-northeast-1a
SPOTINSTANCEPRICE	0.628100	2015-03-23T22:32:15-0500	r3.8xlarge	Linux/UNIX	ap-northeast-1a
SPOTINSTANCEPRICE	0.644400	2015-03-23T22:28:45-0500	r3.8xlarge	Linux/UNIX	ap-northeast-1a
SPOTINSTANCEPRICE	0.636100	2015-03-23T21:47:18-0500	r3.8xlarge	Linux/UNIX	ap-northeast-1a
SPOTINSTANCEPRICE	0.628100	2015-03-23T21:42:05-0500	r3.8xlarge	Linux/UNIX	ap-northeast-1a
SPOTINSTANCEPRICE	0.647500	2015-03-23T21:40:21-0500	r3.8xlarge	Linux/UNIX	ap-northeast-1a
SPOTINSTANCEPRICE	0.656000	2015-03-23T21:36:54-0500	r3.8xlarge	Linux/UNIX	ap-northeast-1a
SPOTINSTANCEPRICE	0.636100	2015-03-23T21:35:11-0500	r3.8xlarge	Linux/UNIX	ap-northeast-1a
SPOTINSTANCEPRICE	0.628100	2015-03-23T21:07:32-0500	r3.8xlarge	Linux/UNIX	ap-northeast-1a
SPOTINSTANCEPRICE	0.644400	2015-03-23T21:05:49-0500	r3.8xlarge	Linux/UNIX	ap-northeast-1a
SPOTINSTANCEPRICE	0.653100	2015-03-23T20:53:41-0500	r3.8xlarge	Linux/UNIX	ap-northeast-1a
SPOTINSTANCEPRICE	0.636100	2015-03-23T20:48:32-0500	r3.8xlarge	Linux/UNIX	ap-northeast-1a
SPOTINSTANCEPRICE	0.656000	2015-03-23T20:43:24-0500	r3.8xlarge	Linux/UNIX	ap-northeast-1a
SPOTINSTANCEPRICE	0.617000	2015-03-23T20:33:01-0500	r3.8xlarge	Linux/UNIX	ap-northeast-1a
SPOTINSTANCEPRICE	0.639300	2015-03-23T20:29:35-0500	r3.8xlarge	Linux/UNIX	ap-northeast-1a
SPOTINSTANCEPRICE	0.617000	2015-03-23T20:26:09-0500	r3.8xlarge	Linux/UNIX	ap-northeast-1a
SPOTINSTANCEPRICE	0.599800	2015-03-23T20:00:18-0500	r3.8xlarge	Linux/UNIX	ap-northeast-1a
SPOTINSTANCEPRICE	0.581500	2015-03-23T19:49:58-0500	r3.8xlarge	Linux/UNIX	ap-northeast-1a
SPOTINSTANCEPRICE	0.587300	2015-03-23T19:32:40-0500	r3.8xlarge	Linux/UNIX	ap-northeast-1a
SPOTINSTANCEPRICE	0.571400	2015-03-23T19:30:56-0500	r3.8xlarge	Linux/UNIX	ap-northeast-1a
SPOTINSTANCEPRICE	0.560700	2015-03-23T19:20:38-0500	r3.8xlarge	Linux/UNIX	ap-northeast-1a
SPOTINSTANCEPRICE	0.555700	2015-03-23T19:15:30-0500	r3.8xlarge	Linux/UNIX	ap-northeast-1a
SPOTINSTANCEPRICE	0.550800	2015-03-23T19:08:34-0500	r3.8xlarge	Linux/UNIX	ap-northeast-1a
SPOTINSTANCEPRICE	0.541700	2015-03-23T18:59:54-0500	r3.8xlarge	Linux/UNIX	ap-northeast-1a
SPOTINSTANCEPRICE	0.546200	2015-03-23T18:58:13-0500	r3.8xlarge	Linux/UNIX	ap-northeast-1a
SPOTINSTANCEPRICE	0.541700	2015-03-23T18:23:46-0500	r3.8xlarge	Linux/UNIX	ap-northeast-1a
SPOTINSTANCEPRICE	0.555700	2015-03-23T18:22:03-0500	r3.8xlarge	Linux/UNIX	ap-northeast-1a
SPOTINSTANCEPRICE	0.560700	2015-03-23T18:15:11-0500	r3.8xlarge	Linux/UNIX	ap-northeast-1a
SPOTINSTANCEPRICE	0.555700	2015-03-23T18:13:27-0500	r3.8xlarge	Linux/UNIX	ap-northeast-1a
SPOTINSTANCEPRICE	0.550800	2015-03-23T18:11:44-0500	r3.8xlarge	Linux/UNIX	ap-northeast-1a
SPOTINSTANCEPRICE	0.555700	2015-03-23T18:09:59-0500	r3.8xlarge	Linux/UNIX	ap-northeast-1a
SPOTINSTANCEPRICE	0.560700	2015-03-23T18:08:17-0500	r3.8xlarge	Linux/UNIX	ap-northeast-1a
SPOTINSTANCEPRICE	0.541700	2015-03-23T17:54:26-0500	r3.8xlarge	Linux/UNIX	ap-northeast-1a
SPOTINSTANCEPRICE	0.560300	2015-03-23T17:02:22-0500	r3.8xlarge	Linux/UNIX	ap-northeast-1a
SPOTINSTANCEPRICE	0.565300	2015-03-23T16:55:27-0500	r3.8xlarge	Linux/UNIX	ap-northeast-1a
SPOTINSTANCEPRICE	0.560300	2015-03-23T16:52:01-0500	r3.8xlarge	Linux/UNIX	ap-northeast-1a
SPOTINSTANCEPRICE	0.565300	2015-03-23T16:48:35-0500	r3.8xlarge	Linux/UNIX	ap-northeast-1a
SPOTINSTANCEPRICE	0.570500	2015-03-23T16:45:05-0500	r3.8xlarge	Linux/UNIX	ap-northeast-1a
SPOTINSTANCEPRICE	0.565300	2015-03-23T16:26:05-0500	r3.8xlarge	Linux/UNIX	ap-northeast-1a
SPOTINSTANCEPRICE	0.560300	2015-03-23T16:20:54-0500	r3.8xlarge	Linux/UNIX	ap-northeast-1a
SPOTINSTANCEPRICE	0.575900	2015-03-23T16:19:12-0500	r3.8xlarge	Linux/UNIX	ap-northeast-1a
SPOTINSTANCEPRICE	0.560300	2015-03-23T16:12:18-0500	r3.8xlarge	Linux/UNIX	ap-northeast-1a
SPOTINSTANCEPRICE	0.555500	2015-03-23T16:07:09-0500	r3.8xlarge	Linux/UNIX	ap-northeast-1a
SPOTINSTANCEPRICE	0.574800	2015-03-23T16:03:43-0500	r3.8xlarge	Linux/UNIX	ap-northeast-1a
SPOTINSTANCEPRICE	0.565300	2015-03-23T16:00:13-0500	r3.8xlarge	Linux/UNIX	ap-northeast-1a
SPOTINSTANCEPRICE	0.555500	2015-03-23T15:41:18-0500	r3.8xlarge	Linux/UNIX	ap-northeast-1a
SPOTINSTANCEPRICE	0.560300	2015-03-23T15:39:34-0500	r3.8xlarge	Linux/UNIX	ap-northeast-1a
SPOTINSTANCEPRICE	0.575900	2015-03-23T15:37:52-0500	r3.8xlarge	Linux/UNIX	ap-northeast-1a
SPOTINSTANCEPRICE	0.570500	2015-03-23T15:32:41-0500	r3.8xlarge	Linux/UNIX	ap-northeast-1a
SPOTINSTANCEPRICE	0.565300	2015-03-23T15:29:13-0500	r3.8xlarge	Linux/UNIX	ap-northeast-1a
SPOTINSTANCEPRICE	0.570500	2015-03-23T15:24:04-0500	r3.8xlarge	Linux/UNIX	ap-northeast-1a
SPOTINSTANCEPRICE	0.555500	2015-03-23T15:08:30-0500	r3.8xlarge	Linux/UNIX	ap-northeast-1a
SPOTINSTANCEPRICE	0.550900	2015-03-23T14:42:35-0500	r3.8xlarge	Linux/UNIX	ap-northeast-1a
SPOTINSTANCEPRICE	0.537400	2015-03-23T14:40:52-0500	r3.8xlarge	Linux/UNIX	ap-northeast-1a
SPOTINSTANCEPRICE	0.533200	2015-03-23T14:37:26-0500	r3.8xlarge	Linux/UNIX	ap-northeast-1a
SPOTINSTANCEPRICE	0.537400	2015-03-23T14:33:58-0500	r3.8xlarge	Linux/UNIX	ap-northeast-1a
SPOTINSTANCEPRICE	0.533200	2015-03-23T14:25:19-0500	r3.8xlarge	Linux/UNIX	ap-northeast-1a
SPOTINSTANCEPRICE	0.537400	2015-03-23T14:23:36-0500	r3.8xlarge	Linux/UNIX	ap-northeast-1a
SPOTINSTANCEPRICE	0.533200	2015-03-23T14:13:17-0500	r3.8xlarge	Linux/UNIX	ap-northeast-1a
SPOTINSTANCEPRICE	0.555500	2015-03-23T13:43:57-0500	r3.8xlarge	Linux/UNIX	ap-northeast-1a
SPOTINSTANCEPRICE	0.569600	2015-03-23T13:40:31-0500	r3.8xlarge	Linux/UNIX	ap-northeast-1a
SPOTINSTANCEPRICE	0.585600	2015-03-23T13:38:46-0500	r3.8xlarge	Linux/UNIX	ap-northeast-1a
SPOTINSTANCEPRICE	0.580100	2015-03-23T13:37:04-0500	r3.8xlarge	Linux/UNIX	ap-northeast-1a
SPOTINSTANCEPRICE	0.595200	2015-03-23T13:35:20-0500	r3.8xlarge	Linux/UNIX	ap-northeast-1a
SPOTINSTANCEPRICE	0.584000	2015-03-23T13:31:54-0500	r3.8xlarge	Linux/UNIX	ap-northeast-1a
SPOTINSTANCEPRICE	0.619900	2015-03-23T13:28:28-0500	r3.8xlarge	Linux/UNIX	ap-northeast-1a
SPOTINSTANCEPRICE	0.604500	2015-03-23T13:26:44-0500	r3.8xlarge	Linux/UNIX	ap-northeast-1a
SPOTINSTANCEPRICE	0.598700	2015-03-23T13:04:12-0500	r3.8xlarge	Linux/UNIX	ap-northeast-1a
SPOTINSTANCEPRICE	0.610600	2015-03-23T13:02:29-0500	r3.8xlarge	Linux/UNIX	ap-northeast-1a
SPOTINSTANCEPRICE	0.598700	2015-03-23T12:38:21-0500	r3.8xlarge	Linux/UNIX	ap-northeast-1a
SPOTINSTANCEPRICE	0.623500	2015-03-23T12:36:37-0500	r3.8xlarge	Linux/UNIX	ap-northeast-1a
SPOTINSTANCEPRICE	0.616900	2015-03-23T12:33:10-0500	r3.8xlarge	Linux/UNIX	ap-northeast-1a
SPOTINSTANCEPRICE	0.598700	2015-03-23T12:27:58-0500	r3.8xlarge	Linux/UNIX	ap-northeast-1a
SPOTINSTANCEPRICE	0.604500	2015-03-23T12:22:46-0500	r3.8xlarge	Linux/UNIX	ap-northeast-1a
SPOTINSTANCEPRICE	0.546200	2015-03-23T12:21:03-0500	r3.8xlarge	Linux/UNIX	ap-northeast-1a
SPOTINSTANCEPRICE	0.541700	2015-03-23T12:14:07-0500	r3.8xlarge	Linux/UNIX	ap-northeast-1a
SPOTINSTANCEPRICE	0.533200	2015-03-23T11:55:04-0500	r3.8xlarge	Linux/UNIX	ap-northeast-1a
SPOTINSTANCEPRICE	0.537400	2015-03-23T11:44:41-0500	r3.8xlarge	Linux/UNIX	ap-northeast-1a
SPOTINSTANCEPRICE	0.541700	2015-03-23T11:25:41-0500	r3.8xlarge	Linux/UNIX	ap-northeast-1a
SPOTINSTANCEPRICE	0.546200	2015-03-23T11:23:58-0500	r3.8xlarge	Linux/UNIX	ap-northeast-1a
SPOTINSTANCEPRICE	0.541700	2015-03-23T10:11:34-0500	r3.8xlarge	Linux/UNIX	ap-northeast-1a
SPOTINSTANCEPRICE	0.546200	2015-03-23T10:08:08-0500	r3.8xlarge	Linux/UNIX	ap-northeast-1a
SPOTINSTANCEPRICE	0.541700	2015-03-23T09:56:02-0500	r3.8xlarge	Linux/UNIX	ap-northeast-1a
SPOTINSTANCEPRICE	0.560700	2015-03-23T09:54:19-0500	r3.8xlarge	Linux/UNIX	ap-northeast-1a
SPOTINSTANCEPRICE	0.565900	2015-03-23T09:50:54-0500	r3.8xlarge	Linux/UNIX	ap-northeast-1a
SPOTINSTANCEPRICE	0.560700	2015-03-23T09:45:45-0500	r3.8xlarge	Linux/UNIX	ap-northeast-1a
SPOTINSTANCEPRICE	0.565900	2015-03-23T09:38:53-0500	r3.8xlarge	Linux/UNIX	ap-northeast-1a
SPOTINSTANCEPRICE	0.560700	2015-03-23T09:35:25-0500	r3.8xlarge	Linux/UNIX	ap-northeast-1a
SPOTINSTANCEPRICE	0.565900	2015-03-23T09:31:59-0500	r3.8xlarge	Linux/UNIX	ap-northeast-1a
SPOTINSTANCEPRICE	0.582900	2015-03-23T09:26:45-0500	r3.8xlarge	Linux/UNIX	ap-northeast-1a
SPOTINSTANCEPRICE	0.565900	2015-03-23T09:16:26-0500	r3.8xlarge	Linux/UNIX	ap-northeast-1a
SPOTINSTANCEPRICE	0.571400	2015-03-23T09:04:20-0500	r3.8xlarge	Linux/UNIX	ap-northeast-1a
SPOTINSTANCEPRICE	0.577000	2015-03-23T09:02:37-0500	r3.8xlarge	Linux/UNIX	ap-northeast-1a
SPOTINSTANCEPRICE	0.571400	2015-03-23T09:00:54-0500	r3.8xlarge	Linux/UNIX	ap-northeast-1a
SPOTINSTANCEPRICE	0.577000	2015-03-23T08:57:25-0500	r3.8xlarge	Linux/UNIX	ap-northeast-1a
SPOTINSTANCEPRICE	0.582900	2015-03-23T08:52:15-0500	r3.8xlarge	Linux/UNIX	ap-northeast-1a
SPOTINSTANCEPRICE	0.577000	2015-03-23T08:48:49-0500	r3.8xlarge	Linux/UNIX	ap-northeast-1a
SPOTINSTANCEPRICE	0.589100	2015-03-23T08:47:07-0500	r3.8xlarge	Linux/UNIX	ap-northeast-1a
SPOTINSTANCEPRICE	0.595500	2015-03-23T08:45:21-0500	r3.8xlarge	Linux/UNIX	ap-northeast-1a
SPOTINSTANCEPRICE	0.589100	2015-03-23T08:33:18-0500	r3.8xlarge	Linux/UNIX	ap-northeast-1a
SPOTINSTANCEPRICE	0.595500	2015-03-23T08:29:48-0500	r3.8xlarge	Linux/UNIX	ap-northeast-1a
SPOTINSTANCEPRICE	0.582900	2015-03-23T07:58:50-0500	r3.8xlarge	Linux/UNIX	ap-northeast-1a
SPOTINSTANCEPRICE	0.609300	2015-03-23T07:57:08-0500	r3.8xlarge	Linux/UNIX	ap-northeast-1a
SPOTINSTANCEPRICE	0.616600	2015-03-23T07:53:41-0500	r3.8xlarge	Linux/UNIX	ap-northeast-1a
SPOTINSTANCEPRICE	0.609300	2015-03-23T07:46:49-0500	r3.8xlarge	Linux/UNIX	ap-northeast-1a
SPOTINSTANCEPRICE	0.589100	2015-03-23T07:45:04-0500	r3.8xlarge	Linux/UNIX	ap-northeast-1a
SPOTINSTANCEPRICE	0.582900	2015-03-23T07:07:16-0500	r3.8xlarge	Linux/UNIX	ap-northeast-1a
SPOTINSTANCEPRICE	0.589100	2015-03-23T06:56:54-0500	r3.8xlarge	Linux/UNIX	ap-northeast-1a
SPOTINSTANCEPRICE	0.595500	2015-03-23T06:51:44-0500	r3.8xlarge	Linux/UNIX	ap-northeast-1a
SPOTINSTANCEPRICE	0.589100	2015-03-23T06:50:03-0500	r3.8xlarge	Linux/UNIX	ap-northeast-1a
SPOTINSTANCEPRICE	0.582900	2015-03-23T06:38:03-0500	r3.8xlarge	Linux/UNIX	ap-northeast-1a
SPOTINSTANCEPRICE	0.589100	2015-03-23T06:26:05-0500	r3.8xlarge	Linux/UNIX	ap-northeast-1a
SPOTINSTANCEPRICE	0.582900	2015-03-23T06:10:35-0500	r3.8xlarge	Linux/UNIX	ap-northeast-1a
SPOTINSTANCEPRICE	0.589100	2015-03-23T06:08:53-0500	r3.8xlarge	Linux/UNIX	ap-northeast-1a
SPOTINSTANCEPRICE	0.582900	2015-03-23T05:36:18-0500	r3.8xlarge	Linux/UNIX	ap-northeast-1a
SPOTINSTANCEPRICE	0.589100	2015-03-23T05:34:36-0500	r3.8xlarge	Linux/UNIX	ap-northeast-1a
SPOTINSTANCEPRICE	0.595500	2015-03-23T05:29:24-0500	r3.8xlarge	Linux/UNIX	ap-northeast-1a
SPOTINSTANCEPRICE	0.602200	2015-03-23T05:22:34-0500	r3.8xlarge	Linux/UNIX	ap-northeast-1a
SPOTINSTANCEPRICE	0.595500	2015-03-23T05:19:09-0500	r3.8xlarge	Linux/UNIX	ap-northeast-1a
SPOTINSTANCEPRICE	0.589100	2015-03-23T05:05:18-0500	r3.8xlarge	Linux/UNIX	ap-northeast-1a
SPOTINSTANCEPRICE	0.641000	2015-03-23T05:00:03-0500	r3.8xlarge	Linux/UNIX	ap-northeast-1a
SPOTINSTANCEPRICE	0.649900	2015-03-23T04:58:18-0500	r3.8xlarge	Linux/UNIX	ap-northeast-1a
SPOTINSTANCEPRICE	0.641000	2015-03-23T04:25:20-0500	r3.8xlarge	Linux/UNIX	ap-northeast-1a
SPOTINSTANCEPRICE	0.649900	2015-03-23T04:23:32-0500	r3.8xlarge	Linux/UNIX	ap-northeast-1a
SPOTINSTANCEPRICE	0.659400	2015-03-23T04:18:18-0500	r3.8xlarge	Linux/UNIX	ap-northeast-1a
SPOTINSTANCEPRICE	0.649900	2015-03-23T04:14:48-0500	r3.8xlarge	Linux/UNIX	ap-northeast-1a
SPOTINSTANCEPRICE	0.632500	2015-03-23T04:11:20-0500	r3.8xlarge	Linux/UNIX	ap-northeast-1a
SPOTINSTANCEPRICE	0.641000	2015-03-23T03:43:16-0500	r3.8xlarge	Linux/UNIX	ap-northeast-1a
SPOTINSTANCEPRICE	0.662300	2015-03-23T03:39:43-0500	r3.8xlarge	Linux/UNIX	ap-northeast-1a
SPOTINSTANCEPRICE	0.672000	2015-03-23T03:36:13-0500	r3.8xlarge	Linux/UNIX	ap-northeast-1a
SPOTINSTANCEPRICE	0.682200	2015-03-23T03:34:31-0500	r3.8xlarge	Linux/UNIX	ap-northeast-1a
SPOTINSTANCEPRICE	0.672000	2015-03-23T03:08:07-0500	r3.8xlarge	Linux/UNIX	ap-northeast-1a
SPOTINSTANCEPRICE	0.662300	2015-03-23T03:01:07-0500	r3.8xlarge	Linux/UNIX	ap-northeast-1a
SPOTINSTANCEPRICE	0.653100	2015-03-23T02:55:53-0500	r3.8xlarge	Linux/UNIX	ap-northeast-1a
SPOTINSTANCEPRICE	0.662300	2015-03-23T02:54:09-0500	r3.8xlarge	Linux/UNIX	ap-northeast-1a
SPOTINSTANCEPRICE	0.653100	2015-03-23T02:49:00-0500	r3.8xlarge	Linux/UNIX	ap-northeast-1a
SPOTINSTANCEPRICE	0.674400	2015-03-23T02:38:37-0500	r3.8xlarge	Linux/UNIX	ap-northeast-1a
SPOTINSTANCEPRICE	0.653100	2015-03-23T02:31:40-0500	r3.8xlarge	Linux/UNIX	ap-northeast-1a
SPOTINSTANCEPRICE	0.662300	2015-03-23T02:24:46-0500	r3.8xlarge	Linux/UNIX	ap-northeast-1a
SPOTINSTANCEPRICE	0.779100	2015-03-23T02:23:02-0500	r3.8xlarge	Linux/UNIX	ap-northeast-1a
SPOTINSTANCEPRICE	0.765900	2015-03-23T02:19:36-0500	r3.8xlarge	Linux/UNIX	ap-northeast-1a
SPOTINSTANCEPRICE	0.741900	2015-03-23T02:07:23-0500	r3.8xlarge	Linux/UNIX	ap-northeast-1a
SPOTINSTANCEPRICE	0.765900	2015-03-23T02:03:54-0500	r3.8xlarge	Linux/UNIX	ap-northeast-1a
SPOTINSTANCEPRICE	0.779100	2015-03-23T01:48:25-0500	r3.8xlarge	Linux/UNIX	ap-northeast-1a
SPOTINSTANCEPRICE	0.793000	2015-03-23T01:46:42-0500	r3.8xlarge	Linux/UNIX	ap-northeast-1a
SPOTINSTANCEPRICE	0.779100	2015-03-23T01:38:07-0500	r3.8xlarge	Linux/UNIX	ap-northeast-1a
SPOTINSTANCEPRICE	0.793000	2015-03-23T01:36:24-0500	r3.8xlarge	Linux/UNIX	ap-northeast-1a
SPOTINSTANCEPRICE	0.779100	2015-03-23T01:34:40-0500	r3.8xlarge	Linux/UNIX	ap-northeast-1a
SPOTINSTANCEPRICE	0.793000	2015-03-23T01:32:56-0500	r3.8xlarge	Linux/UNIX	ap-northeast-1a
SPOTINSTANCEPRICE	0.779100	2015-03-23T01:12:13-0500	r3.8xlarge	Linux/UNIX	ap-northeast-1a
SPOTINSTANCEPRICE	0.804800	2015-03-23T01:07:02-0500	r3.8xlarge	Linux/UNIX	ap-northeast-1a
SPOTINSTANCEPRICE	0.793000	2015-03-23T01:01:48-0500	r3.8xlarge	Linux/UNIX	ap-northeast-1a
SPOTINSTANCEPRICE	0.779100	2015-03-23T00:56:36-0500	r3.8xlarge	Linux/UNIX	ap-northeast-1a
SPOTINSTANCEPRICE	0.793000	2015-03-23T00:54:51-0500	r3.8xlarge	Linux/UNIX	ap-northeast-1a
SPOTINSTANCEPRICE	0.958200	2015-03-23T00:51:25-0500	r3.8xlarge	Linux/UNIX	ap-northeast-1a
SPOTINSTANCEPRICE	0.980800	2015-03-23T00:47:58-0500	r3.8xlarge	Linux/UNIX	ap-northeast-1a
SPOTINSTANCEPRICE	0.946700	2015-03-23T00:46:14-0500	r3.8xlarge	Linux/UNIX	ap-northeast-1a
SPOTINSTANCEPRICE	0.925700	2015-03-23T00:44:29-0500	r3.8xlarge	Linux/UNIX	ap-northeast-1a
SPOTINSTANCEPRICE	0.887500	2015-03-23T00:06:26-0500	r3.8xlarge	Linux/UNIX	ap-northeast-1a
SPOTINSTANCEPRICE	0.980400	2015-03-23T00:01:16-0500	r3.8xlarge	Linux/UNIX	ap-northeast-1a
SPOTINSTANCEPRICE	1.049300	2015-03-22T23:56:05-0500	r3.8xlarge	Linux/UNIX	ap-northeast-1a
SPOTINSTANCEPRICE	1.075900	2015-03-22T23:35:16-0500	r3.8xlarge	Linux/UNIX	ap-northeast-1a
SPOTINSTANCEPRICE	1.104400	2015-03-22T23:33:33-0500	r3.8xlarge	Linux/UNIX	ap-northeast-1a
SPOTINSTANCEPRICE	1.075900	2015-03-22T22:37:59-0500	r3.8xlarge	Linux/UNIX	ap-northeast-1a
SPOTINSTANCEPRICE	0.649900	2015-03-22T22:36:13-0500	r3.8xlarge	Linux/UNIX	ap-northeast-1a
SPOTINSTANCEPRICE	0.624400	2015-03-22T22:34:27-0500	r3.8xlarge	Linux/UNIX	ap-northeast-1a
SPOTINSTANCEPRICE	0.616600	2015-03-22T22:32:45-0500	r3.8xlarge	Linux/UNIX	ap-northeast-1a
SPOTINSTANCEPRICE	0.609300	2015-03-22T22:30:59-0500	r3.8xlarge	Linux/UNIX	ap-northeast-1a
SPOTINSTANCEPRICE	0.599800	2015-03-22T22:29:14-0500	r3.8xlarge	Linux/UNIX	ap-northeast-1a
SPOTINSTANCEPRICE	0.606400	2015-03-22T22:25:46-0500	r3.8xlarge	Linux/UNIX	ap-northeast-1a
SPOTINSTANCEPRICE	0.636100	2015-03-22T22:24:02-0500	r3.8xlarge	Linux/UNIX	ap-northeast-1a
SPOTINSTANCEPRICE	0.644400	2015-03-22T22:10:05-0500	r3.8xlarge	Linux/UNIX	ap-northeast-1a
SPOTINSTANCEPRICE	0.606400	2015-03-22T21:47:31-0500	r3.8xlarge	Linux/UNIX	ap-northeast-1a
SPOTINSTANCEPRICE	0.620500	2015-03-22T21:45:48-0500	r3.8xlarge	Linux/UNIX	ap-northeast-1a
SPOTINSTANCEPRICE	0.636100	2015-03-22T21:40:35-0500	r3.8xlarge	Linux/UNIX	ap-northeast-1a
SPOTINSTANCEPRICE	0.628100	2015-03-22T21:37:09-0500	r3.8xlarge	Linux/UNIX	ap-northeast-1a
SPOTINSTANCEPRICE	0.639300	2015-03-22T21:35:26-0500	r3.8xlarge	Linux/UNIX	ap-northeast-1a
SPOTINSTANCEPRICE	0.647500	2015-03-22T21:31:59-0500	r3.8xlarge	Linux/UNIX	ap-northeast-1a
SPOTINSTANCEPRICE	0.606400	2015-03-22T21:30:13-0500	r3.8xlarge	Linux/UNIX	ap-northeast-1a
SPOTINSTANCEPRICE	0.599800	2015-03-22T21:11:17-0500	r3.8xlarge	Linux/UNIX	ap-northeast-1a
SPOTINSTANCEPRICE	0.606400	2015-03-22T21:09:33-0500	r3.8xlarge	Linux/UNIX	ap-northeast-1a
SPOTINSTANCEPRICE	0.599800	2015-03-22T21:00:58-0500	r3.8xlarge	Linux/UNIX	ap-northeast-1a
SPOTINSTANCEPRICE	0.606400	2015-03-22T20:55:48-0500	r3.8xlarge	Linux/UNIX	ap-northeast-1a
SPOTINSTANCEPRICE	0.575900	2015-03-22T20:45:30-0500	r3.8xlarge	Linux/UNIX	ap-northeast-1a
SPOTINSTANCEPRICE	0.570500	2015-03-22T20:43:47-0500	r3.8xlarge	Linux/UNIX	ap-northeast-1a
SPOTINSTANCEPRICE	0.555500	2015-03-22T20:42:02-0500	r3.8xlarge	Linux/UNIX	ap-northeast-1a
SPOTINSTANCEPRICE	0.580100	2015-03-22T20:30:05-0500	r3.8xlarge	Linux/UNIX	ap-northeast-1a
SPOTINSTANCEPRICE	0.574800	2015-03-22T20:26:39-0500	r3.8xlarge	Linux/UNIX	ap-northeast-1a
SPOTINSTANCEPRICE	0.591400	2015-03-22T20:21:31-0500	r3.8xlarge	Linux/UNIX	ap-northeast-1a
SPOTINSTANCEPRICE	0.575900	2015-03-22T20:12:56-0500	r3.8xlarge	Linux/UNIX	ap-northeast-1a
SPOTINSTANCEPRICE	0.570500	2015-03-22T20:11:12-0500	r3.8xlarge	Linux/UNIX	ap-northeast-1a
SPOTINSTANCEPRICE	0.555500	2015-03-22T19:33:24-0500	r3.8xlarge	Linux/UNIX	ap-northeast-1a
SPOTINSTANCEPRICE	0.541700	2015-03-22T19:16:17-0500	r3.8xlarge	Linux/UNIX	ap-northeast-1a
SPOTINSTANCEPRICE	0.529200	2015-03-22T19:09:21-0500	r3.8xlarge	Linux/UNIX	ap-northeast-1a
SPOTINSTANCEPRICE	0.533200	2015-03-22T19:07:37-0500	r3.8xlarge	Linux/UNIX	ap-northeast-1a
SPOTINSTANCEPRICE	0.529200	2015-03-22T19:05:53-0500	r3.8xlarge	Linux/UNIX	ap-northeast-1a
SPOTINSTANCEPRICE	0.533200	2015-03-22T19:04:10-0500	r3.8xlarge	Linux/UNIX	ap-northeast-1a
SPOTINSTANCEPRICE	0.529200	2015-03-22T18:57:19-0500	r3.8xlarge	Linux/UNIX	ap-northeast-1a
SPOTINSTANCEPRICE	0.533200	2015-03-22T18:52:10-0500	r3.8xlarge	Linux/UNIX	ap-northeast-1a
SPOTINSTANCEPRICE	0.529200	2015-03-22T18:35:00-0500	r3.8xlarge	Linux/UNIX	ap-northeast-1a
SPOTINSTANCEPRICE	0.541700	2015-03-22T18:29:51-0500	r3.8xlarge	Linux/UNIX	ap-northeast-1a
SPOTINSTANCEPRICE	0.529200	2015-03-22T18:26:26-0500	r3.8xlarge	Linux/UNIX	ap-northeast-1a
SPOTINSTANCEPRICE	0.525300	2015-03-22T17:55:33-0500	r3.8xlarge	Linux/UNIX	ap-northeast-1a
SPOTINSTANCEPRICE	0.538000	2015-03-22T17:50:24-0500	r3.8xlarge	Linux/UNIX	ap-northeast-1a
SPOTINSTANCEPRICE	0.542200	2015-03-22T17:46:59-0500	r3.8xlarge	Linux/UNIX	ap-northeast-1a
SPOTINSTANCEPRICE	0.546500	2015-03-22T17:43:33-0500	r3.8xlarge	Linux/UNIX	ap-northeast-1a
SPOTINSTANCEPRICE	0.542200	2015-03-22T16:48:34-0500	r3.8xlarge	Linux/UNIX	ap-northeast-1a
SPOTINSTANCEPRICE	0.546500	2015-03-22T16:36:35-0500	r3.8xlarge	Linux/UNIX	ap-northeast-1a
SPOTINSTANCEPRICE	0.555500	2015-03-22T16:33:09-0500	r3.8xlarge	Linux/UNIX	ap-northeast-1a
SPOTINSTANCEPRICE	0.546500	2015-03-22T16:31:25-0500	r3.8xlarge	Linux/UNIX	ap-northeast-1a
SPOTINSTANCEPRICE	0.555500	2015-03-22T16:16:03-0500	r3.8xlarge	Linux/UNIX	ap-northeast-1a
SPOTINSTANCEPRICE	0.542200	2015-03-22T16:07:30-0500	r3.8xlarge	Linux/UNIX	ap-northeast-1a
SPOTINSTANCEPRICE	0.550900	2015-03-22T16:02:22-0500	r3.8xlarge	Linux/UNIX	ap-northeast-1a
SPOTINSTANCEPRICE	0.555300	2015-03-22T15:58:54-0500	r3.8xlarge	Linux/UNIX	ap-northeast-1a
SPOTINSTANCEPRICE	0.555500	2015-03-22T15:57:12-0500	r3.8xlarge	Linux/UNIX	ap-northeast-1a
SPOTINSTANCEPRICE	0.550900	2015-03-22T15:52:05-0500	r3.8xlarge	Linux/UNIX	ap-northeast-1a
SPOTINSTANCEPRICE	0.546500	2015-03-22T15:50:22-0500	r3.8xlarge	Linux/UNIX	ap-northeast-1a
SPOTINSTANCEPRICE	0.555500	2015-03-22T15:45:17-0500	r3.8xlarge	Linux/UNIX	ap-northeast-1a
SPOTINSTANCEPRICE	0.550900	2015-03-22T15:41:52-0500	r3.8xlarge	Linux/UNIX	ap-northeast-1a
SPOTINSTANCEPRICE	0.546500	2015-03-22T15:40:08-0500	r3.8xlarge	Linux/UNIX	ap-northeast-1a
SPOTINSTANCEPRICE	0.555500	2015-03-22T15:35:03-0500	r3.8xlarge	Linux/UNIX	ap-northeast-1a
SPOTINSTANCEPRICE	0.538000	2015-03-22T15:04:18-0500	r3.8xlarge	Linux/UNIX	ap-northeast-1a
SPOTINSTANCEPRICE	0.546500	2015-03-22T15:02:35-0500	r3.8xlarge	Linux/UNIX	ap-northeast-1a
SPOTINSTANCEPRICE	0.534000	2015-03-22T14:52:21-0500	r3.8xlarge	Linux/UNIX	ap-northeast-1a
SPOTINSTANCEPRICE	0.538000	2015-03-22T14:47:13-0500	r3.8xlarge	Linux/UNIX	ap-northeast-1a
SPOTINSTANCEPRICE	0.534000	2015-03-22T14:43:48-0500	r3.8xlarge	Linux/UNIX	ap-northeast-1a
SPOTINSTANCEPRICE	0.521600	2015-03-22T14:42:07-0500	r3.8xlarge	Linux/UNIX	ap-northeast-1a
SPOTINSTANCEPRICE	0.525300	2015-03-22T14:40:23-0500	r3.8xlarge	Linux/UNIX	ap-northeast-1a
SPOTINSTANCEPRICE	0.521600	2015-03-22T14:30:10-0500	r3.8xlarge	Linux/UNIX	ap-northeast-1a
SPOTINSTANCEPRICE	0.529200	2015-03-22T14:23:21-0500	r3.8xlarge	Linux/UNIX	ap-northeast-1a
SPOTINSTANCEPRICE	0.518000	2015-03-22T14:13:09-0500	r3.8xlarge	Linux/UNIX	ap-northeast-1a
SPOTINSTANCEPRICE	0.530100	2015-03-22T14:11:25-0500	r3.8xlarge	Linux/UNIX	ap-northeast-1a
SPOTINSTANCEPRICE	0.538000	2015-03-22T14:06:21-0500	r3.8xlarge	Linux/UNIX	ap-northeast-1a
SPOTINSTANCEPRICE	0.546500	2015-03-22T13:59:34-0500	r3.8xlarge	Linux/UNIX	ap-northeast-1a
SPOTINSTANCEPRICE	0.555500	2015-03-22T13:52:50-0500	r3.8xlarge	Linux/UNIX	ap-northeast-1a
SPOTINSTANCEPRICE	0.546500	2015-03-22T13:47:46-0500	r3.8xlarge	Linux/UNIX	ap-northeast-1a
SPOTINSTANCEPRICE	0.559900	2015-03-22T13:44:22-0500	r3.8xlarge	Linux/UNIX	ap-northeast-1a
SPOTINSTANCEPRICE	0.550900	2015-03-22T13:30:48-0500	r3.8xlarge	Linux/UNIX	ap-northeast-1a
SPOTINSTANCEPRICE	0.591100	2015-03-22T13:27:24-0500	r3.8xlarge	Linux/UNIX	ap-northeast-1a
SPOTINSTANCEPRICE	0.577400	2015-03-22T12:26:01-0500	r3.8xlarge	Linux/UNIX	ap-northeast-1a
SPOTINSTANCEPRICE	0.564000	2015-03-22T12:22:38-0500	r3.8xlarge	Linux/UNIX	ap-northeast-1a
SPOTINSTANCEPRICE	0.525300	2015-03-22T12:20:54-0500	r3.8xlarge	Linux/UNIX	ap-northeast-1a
SPOTINSTANCEPRICE	0.521600	2015-03-22T12:19:12-0500	r3.8xlarge	Linux/UNIX	ap-northeast-1a
SPOTINSTANCEPRICE	0.518000	2015-03-22T11:55:18-0500	r3.8xlarge	Linux/UNIX	ap-northeast-1a
SPOTINSTANCEPRICE	0.521600	2015-03-22T11:45:05-0500	r3.8xlarge	Linux/UNIX	ap-northeast-1a
SPOTINSTANCEPRICE	0.525300	2015-03-22T09:33:23-0500	r3.8xlarge	Linux/UNIX	ap-northeast-1a
SPOTINSTANCEPRICE	0.533200	2015-03-22T09:28:14-0500	r3.8xlarge	Linux/UNIX	ap-northeast-1a
SPOTINSTANCEPRICE	0.525300	2015-03-22T08:16:25-0500	r3.8xlarge	Linux/UNIX	ap-northeast-1a
SPOTINSTANCEPRICE	0.521600	2015-03-22T08:11:13-0500	r3.8xlarge	Linux/UNIX	ap-northeast-1a
SPOTINSTANCEPRICE	0.525300	2015-03-22T08:07:50-0500	r3.8xlarge	Linux/UNIX	ap-northeast-1a
SPOTINSTANCEPRICE	0.521600	2015-03-22T08:02:40-0500	r3.8xlarge	Linux/UNIX	ap-northeast-1a
SPOTINSTANCEPRICE	0.525300	2015-03-22T08:00:57-0500	r3.8xlarge	Linux/UNIX	ap-northeast-1a
SPOTINSTANCEPRICE	0.521600	2015-03-22T07:54:05-0500	r3.8xlarge	Linux/UNIX	ap-northeast-1a
SPOTINSTANCEPRICE	0.525300	2015-03-22T07:52:23-0500	r3.8xlarge	Linux/UNIX	ap-northeast-1a
SPOTINSTANCEPRICE	0.521600	2015-03-22T07:04:27-0500	r3.8xlarge	Linux/UNIX	ap-northeast-1a
SPOTINSTANCEPRICE	0.529200	2015-03-22T07:01:02-0500	r3.8xlarge	Linux/UNIX	ap-northeast-1a
SPOTINSTANCEPRICE	0.533200	2015-03-22T06:55:55-0500	r3.8xlarge	Linux/UNIX	ap-northeast-1a
SPOTINSTANCEPRICE	0.529200	2015-03-22T06:49:05-0500	r3.8xlarge	Linux/UNIX	ap-northeast-1a
SPOTINSTANCEPRICE	0.521600	2015-03-22T06:32:06-0500	r3.8xlarge	Linux/UNIX	ap-northeast-1a
SPOTINSTANCEPRICE	0.529200	2015-03-22T06:18:32-0500	r3.8xlarge	Linux/UNIX	ap-northeast-1a
SPOTINSTANCEPRICE	0.521600	2015-03-22T06:09:55-0500	r3.8xlarge	Linux/UNIX	ap-northeast-1a
SPOTINSTANCEPRICE	0.529200	2015-03-22T05:56:19-0500	r3.8xlarge	Linux/UNIX	ap-northeast-1a
SPOTINSTANCEPRICE	0.537400	2015-03-22T05:52:57-0500	r3.8xlarge	Linux/UNIX	ap-northeast-1a
SPOTINSTANCEPRICE	0.521600	2015-03-22T05:41:03-0500	r3.8xlarge	Linux/UNIX	ap-northeast-1a
SPOTINSTANCEPRICE	0.525300	2015-03-22T05:39:23-0500	r3.8xlarge	Linux/UNIX	ap-northeast-1a
SPOTINSTANCEPRICE	0.521600	2015-03-22T05:05:22-0500	r3.8xlarge	Linux/UNIX	ap-northeast-1a
SPOTINSTANCEPRICE	0.529200	2015-03-22T04:51:38-0500	r3.8xlarge	Linux/UNIX	ap-northeast-1a
SPOTINSTANCEPRICE	0.537400	2015-03-22T04:49:55-0500	r3.8xlarge	Linux/UNIX	ap-northeast-1a
SPOTINSTANCEPRICE	0.525300	2015-03-22T04:46:29-0500	r3.8xlarge	Linux/UNIX	ap-northeast-1a
SPOTINSTANCEPRICE	0.521600	2015-03-22T04:22:27-0500	r3.8xlarge	Linux/UNIX	ap-northeast-1a
SPOTINSTANCEPRICE	0.525300	2015-03-22T04:20:39-0500	r3.8xlarge	Linux/UNIX	ap-northeast-1a
SPOTINSTANCEPRICE	0.529200	2015-03-22T04:08:33-0500	r3.8xlarge	Linux/UNIX	ap-northeast-1a
SPOTINSTANCEPRICE	0.533200	2015-03-22T04:05:06-0500	r3.8xlarge	Linux/UNIX	ap-northeast-1a
SPOTINSTANCEPRICE	0.521600	2015-03-22T03:46:09-0500	r3.8xlarge	Linux/UNIX	ap-northeast-1a
SPOTINSTANCEPRICE	0.525300	2015-03-22T03:42:42-0500	r3.8xlarge	Linux/UNIX	ap-northeast-1a
SPOTINSTANCEPRICE	0.538000	2015-03-22T03:40:59-0500	r3.8xlarge	Linux/UNIX	ap-northeast-1a
SPOTINSTANCEPRICE	0.534000	2015-03-22T03:39:14-0500	r3.8xlarge	Linux/UNIX	ap-northeast-1a
SPOTINSTANCEPRICE	0.538000	2015-03-22T03:15:08-0500	r3.8xlarge	Linux/UNIX	ap-northeast-1a
SPOTINSTANCEPRICE	0.542200	2015-03-22T03:13:24-0500	r3.8xlarge	Linux/UNIX	ap-northeast-1a
SPOTINSTANCEPRICE	0.538000	2015-03-22T03:04:49-0500	r3.8xlarge	Linux/UNIX	ap-northeast-1a
SPOTINSTANCEPRICE	0.542200	2015-03-22T03:03:07-0500	r3.8xlarge	Linux/UNIX	ap-northeast-1a
SPOTINSTANCEPRICE	0.538000	2015-03-22T02:35:40-0500	r3.8xlarge	Linux/UNIX	ap-northeast-1a
SPOTINSTANCEPRICE	0.542200	2015-03-22T02:32:15-0500	r3.8xlarge	Linux/UNIX	ap-northeast-1a
SPOTINSTANCEPRICE	0.538000	2015-03-22T02:30:32-0500	r3.8xlarge	Linux/UNIX	ap-northeast-1a
SPOTINSTANCEPRICE	0.605000	2015-03-22T02:27:06-0500	r3.8xlarge	Linux/UNIX	ap-northeast-1a
SPOTINSTANCEPRICE	0.622700	2015-03-22T02:23:41-0500	r3.8xlarge	Linux/UNIX	ap-northeast-1a
SPOTINSTANCEPRICE	0.607700	2015-03-22T02:20:14-0500	r3.8xlarge	Linux/UNIX	ap-northeast-1a
SPOTINSTANCEPRICE	0.602000	2015-03-22T02:13:18-0500	r3.8xlarge	Linux/UNIX	ap-northeast-1a
SPOTINSTANCEPRICE	0.591100	2015-03-22T01:56:05-0500	r3.8xlarge	Linux/UNIX	ap-northeast-1a
SPOTINSTANCEPRICE	0.602000	2015-03-22T01:52:39-0500	r3.8xlarge	Linux/UNIX	ap-northeast-1a
SPOTINSTANCEPRICE	0.607700	2015-03-22T01:42:19-0500	r3.8xlarge	Linux/UNIX	ap-northeast-1a
SPOTINSTANCEPRICE	0.591100	2015-03-22T01:30:19-0500	r3.8xlarge	Linux/UNIX	ap-northeast-1a
SPOTINSTANCEPRICE	0.605000	2015-03-22T01:28:35-0500	r3.8xlarge	Linux/UNIX	ap-northeast-1a
SPOTINSTANCEPRICE	0.610700	2015-03-22T01:26:54-0500	r3.8xlarge	Linux/UNIX	ap-northeast-1a
SPOTINSTANCEPRICE	0.616500	2015-03-22T01:20:04-0500	r3.8xlarge	Linux/UNIX	ap-northeast-1a
SPOTINSTANCEPRICE	0.610700	2015-03-22T01:06:21-0500	r3.8xlarge	Linux/UNIX	ap-northeast-1a
SPOTINSTANCEPRICE	0.629000	2015-03-22T00:50:53-0500	r3.8xlarge	Linux/UNIX	ap-northeast-1a
SPOTINSTANCEPRICE	0.635600	2015-03-22T00:49:11-0500	r3.8xlarge	Linux/UNIX	ap-northeast-1a
SPOTINSTANCEPRICE	0.616500	2015-03-22T00:47:29-0500	r3.8xlarge	Linux/UNIX	ap-northeast-1a
SPOTINSTANCEPRICE	0.610700	2015-03-22T00:15:01-0500	r3.8xlarge	Linux/UNIX	ap-northeast-1a
SPOTINSTANCEPRICE	0.616500	2015-03-22T00:13:18-0500	r3.8xlarge	Linux/UNIX	ap-northeast-1a
SPOTINSTANCEPRICE	0.694400	2015-03-22T00:11:36-0500	r3.8xlarge	Linux/UNIX	ap-northeast-1a
SPOTINSTANCEPRICE	0.728900	2015-03-22T00:08:12-0500	r3.8xlarge	Linux/UNIX	ap-northeast-1a
SPOTINSTANCEPRICE	0.710800	2015-03-22T00:06:29-0500	r3.8xlarge	Linux/UNIX	ap-northeast-1a
SPOTINSTANCEPRICE	0.702100	2015-03-21T23:49:27-0500	r3.8xlarge	Linux/UNIX	ap-northeast-1a
SPOTINSTANCEPRICE	0.795000	2015-03-21T23:47:46-0500	r3.8xlarge	Linux/UNIX	ap-northeast-1a
SPOTINSTANCEPRICE	0.831200	2015-03-21T23:20:34-0500	r3.8xlarge	Linux/UNIX	ap-northeast-1a
SPOTINSTANCEPRICE	0.873000	2015-03-21T23:17:08-0500	r3.8xlarge	Linux/UNIX	ap-northeast-1a
SPOTINSTANCEPRICE	0.888400	2015-03-21T23:15:23-0500	r3.8xlarge	Linux/UNIX	ap-northeast-1a
SPOTINSTANCEPRICE	0.904600	2015-03-21T23:10:15-0500	r3.8xlarge	Linux/UNIX	ap-northeast-1a
SPOTINSTANCEPRICE	0.873000	2015-03-21T23:06:50-0500	r3.8xlarge	Linux/UNIX	ap-northeast-1a
SPOTINSTANCEPRICE	0.888400	2015-03-21T23:03:25-0500	r3.8xlarge	Linux/UNIX	ap-northeast-1a
SPOTINSTANCEPRICE	0.873000	2015-03-21T22:59:58-0500	r3.8xlarge	Linux/UNIX	ap-northeast-1a
SPOTINSTANCEPRICE	0.831200	2015-03-21T22:47:54-0500	r3.8xlarge	Linux/UNIX	ap-northeast-1a
SPOTINSTANCEPRICE	0.784000	2015-03-21T22:44:26-0500	r3.8xlarge	Linux/UNIX	ap-northeast-1a
SPOTINSTANCEPRICE	0.773500	2015-03-21T22:41:00-0500	r3.8xlarge	Linux/UNIX	ap-northeast-1a
SPOTINSTANCEPRICE	0.653500	2015-03-21T22:37:36-0500	r3.8xlarge	Linux/UNIX	ap-northeast-1a
SPOTINSTANCEPRICE	0.537400	2015-03-21T22:35:52-0500	r3.8xlarge	Linux/UNIX	ap-northeast-1a
SPOTINSTANCEPRICE	0.533200	2015-03-21T22:34:09-0500	r3.8xlarge	Linux/UNIX	ap-northeast-1a
SPOTINSTANCEPRICE	0.525300	2015-03-21T22:30:43-0500	r3.8xlarge	Linux/UNIX	ap-northeast-1a
SPOTINSTANCEPRICE	0.538000	2015-03-21T22:28:59-0500	r3.8xlarge	Linux/UNIX	ap-northeast-1a
SPOTINSTANCEPRICE	0.542200	2015-03-21T21:42:24-0500	r3.8xlarge	Linux/UNIX	ap-northeast-1a
SPOTINSTANCEPRICE	0.538000	2015-03-21T21:37:14-0500	r3.8xlarge	Linux/UNIX	ap-northeast-1a
SPOTINSTANCEPRICE	0.555300	2015-03-21T21:33:48-0500	r3.8xlarge	Linux/UNIX	ap-northeast-1a
SPOTINSTANCEPRICE	0.546500	2015-03-21T21:32:05-0500	r3.8xlarge	Linux/UNIX	ap-northeast-1a
SPOTINSTANCEPRICE	0.550900	2015-03-21T21:30:22-0500	r3.8xlarge	Linux/UNIX	ap-northeast-1a
SPOTINSTANCEPRICE	0.555500	2015-03-21T21:25:12-0500	r3.8xlarge	Linux/UNIX	ap-northeast-1a
SPOTINSTANCEPRICE	0.550900	2015-03-21T21:16:37-0500	r3.8xlarge	Linux/UNIX	ap-northeast-1a
SPOTINSTANCEPRICE	0.538000	2015-03-21T21:01:07-0500	r3.8xlarge	Linux/UNIX	ap-northeast-1a
SPOTINSTANCEPRICE	0.542200	2015-03-21T20:47:20-0500	r3.8xlarge	Linux/UNIX	ap-northeast-1a
SPOTINSTANCEPRICE	0.546500	2015-03-21T20:45:37-0500	r3.8xlarge	Linux/UNIX	ap-northeast-1a
SPOTINSTANCEPRICE	0.542200	2015-03-21T20:43:54-0500	r3.8xlarge	Linux/UNIX	ap-northeast-1a
SPOTINSTANCEPRICE	0.546500	2015-03-21T20:42:12-0500	r3.8xlarge	Linux/UNIX	ap-northeast-1a
SPOTINSTANCEPRICE	0.564700	2015-03-21T20:31:52-0500	r3.8xlarge	Linux/UNIX	ap-northeast-1a
SPOTINSTANCEPRICE	0.559900	2015-03-21T20:23:16-0500	r3.8xlarge	Linux/UNIX	ap-northeast-1a
SPOTINSTANCEPRICE	0.550900	2015-03-21T20:21:33-0500	r3.8xlarge	Linux/UNIX	ap-northeast-1a
SPOTINSTANCEPRICE	0.542200	2015-03-21T19:40:17-0500	r3.8xlarge	Linux/UNIX	ap-northeast-1a
SPOTINSTANCEPRICE	0.538000	2015-03-21T19:36:51-0500	r3.8xlarge	Linux/UNIX	ap-northeast-1a
SPOTINSTANCEPRICE	0.542200	2015-03-21T19:33:25-0500	r3.8xlarge	Linux/UNIX	ap-northeast-1a
SPOTINSTANCEPRICE	0.529200	2015-03-21T19:31:43-0500	r3.8xlarge	Linux/UNIX	ap-northeast-1a
SPOTINSTANCEPRICE	0.525300	2015-03-21T19:21:25-0500	r3.8xlarge	Linux/UNIX	ap-northeast-1a
SPOTINSTANCEPRICE	0.529200	2015-03-21T19:19:42-0500	r3.8xlarge	Linux/UNIX	ap-northeast-1a
SPOTINSTANCEPRICE	0.525300	2015-03-21T18:14:38-0500	r3.8xlarge	Linux/UNIX	ap-northeast-1a
SPOTINSTANCEPRICE	0.529200	2015-03-21T18:07:51-0500	r3.8xlarge	Linux/UNIX	ap-northeast-1a
SPOTINSTANCEPRICE	0.541700	2015-03-21T18:06:08-0500	r3.8xlarge	Linux/UNIX	ap-northeast-1a
SPOTINSTANCEPRICE	0.537400	2015-03-21T18:00:59-0500	r3.8xlarge	Linux/UNIX	ap-northeast-1a
SPOTINSTANCEPRICE	0.533200	2015-03-21T17:54:07-0500	r3.8xlarge	Linux/UNIX	ap-northeast-1a
SPOTINSTANCEPRICE	0.546500	2015-03-21T17:52:25-0500	r3.8xlarge	Linux/UNIX	ap-northeast-1a
SPOTINSTANCEPRICE	0.542200	2015-03-21T17:43:50-0500	r3.8xlarge	Linux/UNIX	ap-northeast-1a
SPOTINSTANCEPRICE	0.546500	2015-03-21T17:30:11-0500	r3.8xlarge	Linux/UNIX	ap-northeast-1a
SPOTINSTANCEPRICE	0.555500	2015-03-21T17:28:28-0500	r3.8xlarge	Linux/UNIX	ap-northeast-1a
SPOTINSTANCEPRICE	0.542200	2015-03-21T16:47:21-0500	r3.8xlarge	Linux/UNIX	ap-northeast-1a
SPOTINSTANCEPRICE	0.546500	2015-03-21T16:43:54-0500	r3.8xlarge	Linux/UNIX	ap-northeast-1a
SPOTINSTANCEPRICE	0.550900	2015-03-21T16:42:12-0500	r3.8xlarge	Linux/UNIX	ap-northeast-1a
SPOTINSTANCEPRICE	0.542200	2015-03-21T16:09:39-0500	r3.8xlarge	Linux/UNIX	ap-northeast-1a
SPOTINSTANCEPRICE	0.538000	2015-03-21T16:06:14-0500	r3.8xlarge	Linux/UNIX	ap-northeast-1a
SPOTINSTANCEPRICE	0.550900	2015-03-21T16:04:31-0500	r3.8xlarge	Linux/UNIX	ap-northeast-1a
SPOTINSTANCEPRICE	0.555300	2015-03-21T16:01:06-0500	r3.8xlarge	Linux/UNIX	ap-northeast-1a
SPOTINSTANCEPRICE	0.542200	2015-03-21T15:59:21-0500	r3.8xlarge	Linux/UNIX	ap-northeast-1a
SPOTINSTANCEPRICE	0.538000	2015-03-21T15:03:05-0500	r3.8xlarge	Linux/UNIX	ap-northeast-1a
SPOTINSTANCEPRICE	0.534000	2015-03-21T14:44:22-0500	r3.8xlarge	Linux/UNIX	ap-northeast-1a
SPOTINSTANCEPRICE	0.521600	2015-03-21T14:40:59-0500	r3.8xlarge	Linux/UNIX	ap-northeast-1a
SPOTINSTANCEPRICE	0.518000	2015-03-21T14:10:22-0500	r3.8xlarge	Linux/UNIX	ap-northeast-1a
SPOTINSTANCEPRICE	0.521600	2015-03-21T14:08:40-0500	r3.8xlarge	Linux/UNIX	ap-northeast-1a
SPOTINSTANCEPRICE	0.518000	2015-03-21T14:00:09-0500	r3.8xlarge	Linux/UNIX	ap-northeast-1a
SPOTINSTANCEPRICE	0.530100	2015-03-21T13:56:46-0500	r3.8xlarge	Linux/UNIX	ap-northeast-1a
SPOTINSTANCEPRICE	0.534000	2015-03-21T13:55:04-0500	r3.8xlarge	Linux/UNIX	ap-northeast-1a
SPOTINSTANCEPRICE	0.538000	2015-03-21T13:43:11-0500	r3.8xlarge	Linux/UNIX	ap-northeast-1a
SPOTINSTANCEPRICE	0.550900	2015-03-21T13:19:22-0500	r3.8xlarge	Linux/UNIX	ap-northeast-1a
SPOTINSTANCEPRICE	0.591100	2015-03-21T13:14:15-0500	r3.8xlarge	Linux/UNIX	ap-northeast-1a
SPOTINSTANCEPRICE	0.607700	2015-03-21T13:10:51-0500	r3.8xlarge	Linux/UNIX	ap-northeast-1a
SPOTINSTANCEPRICE	0.593100	2015-03-21T13:09:08-0500	r3.8xlarge	Linux/UNIX	ap-northeast-1a
SPOTINSTANCEPRICE	0.587700	2015-03-21T12:46:59-0500	r3.8xlarge	Linux/UNIX	ap-northeast-1a
SPOTINSTANCEPRICE	0.593100	2015-03-21T12:45:16-0500	r3.8xlarge	Linux/UNIX	ap-northeast-1a
SPOTINSTANCEPRICE	0.587700	2015-03-21T12:31:41-0500	r3.8xlarge	Linux/UNIX	ap-northeast-1a
SPOTINSTANCEPRICE	0.577400	2015-03-21T12:26:34-0500	r3.8xlarge	Linux/UNIX	ap-northeast-1a
SPOTINSTANCEPRICE	0.538000	2015-03-21T12:23:09-0500	r3.8xlarge	Linux/UNIX	ap-northeast-1a
SPOTINSTANCEPRICE	0.525300	2015-03-21T12:21:26-0500	r3.8xlarge	Linux/UNIX	ap-northeast-1a
SPOTINSTANCEPRICE	0.518000	2015-03-21T11:57:34-0500	r3.8xlarge	Linux/UNIX	ap-northeast-1a
SPOTINSTANCEPRICE	0.521600	2015-03-21T11:45:40-0500	r3.8xlarge	Linux/UNIX	ap-northeast-1a
SPOTINSTANCEPRICE	0.525300	2015-03-21T11:28:39-0500	r3.8xlarge	Linux/UNIX	ap-northeast-1a
SPOTINSTANCEPRICE	0.537400	2015-03-21T11:26:56-0500	r3.8xlarge	Linux/UNIX	ap-northeast-1a
SPOTINSTANCEPRICE	0.533200	2015-03-21T11:16:44-0500	r3.8xlarge	Linux/UNIX	ap-northeast-1a
SPOTINSTANCEPRICE	0.537400	2015-03-21T11:11:37-0500	r3.8xlarge	Linux/UNIX	ap-northeast-1a
SPOTINSTANCEPRICE	0.525300	2015-03-21T10:20:28-0500	r3.8xlarge	Linux/UNIX	ap-northeast-1a
SPOTINSTANCEPRICE	0.533200	2015-03-21T10:17:04-0500	r3.8xlarge	Linux/UNIX	ap-northeast-1a
SPOTINSTANCEPRICE	0.529200	2015-03-21T10:15:17-0500	r3.8xlarge	Linux/UNIX	ap-northeast-1a
SPOTINSTANCEPRICE	0.525300	2015-03-21T09:59:49-0500	r3.8xlarge	Linux/UNIX	ap-northeast-1a
SPOTINSTANCEPRICE	0.529200	2015-03-21T09:58:07-0500	r3.8xlarge	Linux/UNIX	ap-northeast-1a
SPOTINSTANCEPRICE	0.525300	2015-03-21T09:10:06-0500	r3.8xlarge	Linux/UNIX	ap-northeast-1a
SPOTINSTANCEPRICE	0.533200	2015-03-21T09:06:43-0500	r3.8xlarge	Linux/UNIX	ap-northeast-1a
SPOTINSTANCEPRICE	0.529200	2015-03-21T09:04:59-0500	r3.8xlarge	Linux/UNIX	ap-northeast-1a
SPOTINSTANCEPRICE	0.525300	2015-03-21T07:05:53-0500	r3.8xlarge	Linux/UNIX	ap-northeast-1a
SPOTINSTANCEPRICE	0.533200	2015-03-21T06:53:59-0500	r3.8xlarge	Linux/UNIX	ap-northeast-1a
SPOTINSTANCEPRICE	0.537400	2015-03-21T06:48:53-0500	r3.8xlarge	Linux/UNIX	ap-northeast-1a
SPOTINSTANCEPRICE	0.533200	2015-03-21T06:42:06-0500	r3.8xlarge	Linux/UNIX	ap-northeast-1a
SPOTINSTANCEPRICE	0.537400	2015-03-21T06:31:57-0500	r3.8xlarge	Linux/UNIX	ap-northeast-1a
SPOTINSTANCEPRICE	0.541700	2015-03-21T06:28:32-0500	r3.8xlarge	Linux/UNIX	ap-northeast-1a
SPOTINSTANCEPRICE	0.550800	2015-03-21T06:26:50-0500	r3.8xlarge	Linux/UNIX	ap-northeast-1a
SPOTINSTANCEPRICE	0.541700	2015-03-21T06:18:21-0500	r3.8xlarge	Linux/UNIX	ap-northeast-1a
SPOTINSTANCEPRICE	0.537400	2015-03-21T06:11:35-0500	r3.8xlarge	Linux/UNIX	ap-northeast-1a
SPOTINSTANCEPRICE	0.533200	2015-03-21T06:08:11-0500	r3.8xlarge	Linux/UNIX	ap-northeast-1a
SPOTINSTANCEPRICE	0.541700	2015-03-21T06:04:47-0500	r3.8xlarge	Linux/UNIX	ap-northeast-1a
SPOTINSTANCEPRICE	0.533200	2015-03-21T05:46:06-0500	r3.8xlarge	Linux/UNIX	ap-northeast-1a
SPOTINSTANCEPRICE	0.537400	2015-03-21T05:41:00-0500	r3.8xlarge	Linux/UNIX	ap-northeast-1a
SPOTINSTANCEPRICE	0.533200	2015-03-21T05:25:42-0500	r3.8xlarge	Linux/UNIX	ap-northeast-1a
SPOTINSTANCEPRICE	0.537400	2015-03-21T05:24:00-0500	r3.8xlarge	Linux/UNIX	ap-northeast-1a
SPOTINSTANCEPRICE	0.533200	2015-03-21T05:20:37-0500	r3.8xlarge	Linux/UNIX	ap-northeast-1a
SPOTINSTANCEPRICE	0.541700	2015-03-21T05:10:23-0500	r3.8xlarge	Linux/UNIX	ap-northeast-1a
SPOTINSTANCEPRICE	0.550800	2015-03-21T05:06:58-0500	r3.8xlarge	Linux/UNIX	ap-northeast-1a
SPOTINSTANCEPRICE	0.541700	2015-03-21T05:01:50-0500	r3.8xlarge	Linux/UNIX	ap-northeast-1a
SPOTINSTANCEPRICE	0.550800	2015-03-21T04:56:42-0500	r3.8xlarge	Linux/UNIX	ap-northeast-1a
SPOTINSTANCEPRICE	0.541700	2015-03-21T04:51:33-0500	r3.8xlarge	Linux/UNIX	ap-northeast-1a
SPOTINSTANCEPRICE	0.546200	2015-03-21T04:48:08-0500	r3.8xlarge	Linux/UNIX	ap-northeast-1a
SPOTINSTANCEPRICE	0.541700	2015-03-21T04:46:26-0500	r3.8xlarge	Linux/UNIX	ap-northeast-1a
SPOTINSTANCEPRICE	0.546200	2015-03-21T04:44:42-0500	r3.8xlarge	Linux/UNIX	ap-northeast-1a
SPOTINSTANCEPRICE	0.550800	2015-03-21T04:34:24-0500	r3.8xlarge	Linux/UNIX	ap-northeast-1a
SPOTINSTANCEPRICE	0.555700	2015-03-21T04:32:41-0500	r3.8xlarge	Linux/UNIX	ap-northeast-1a
SPOTINSTANCEPRICE	0.541700	2015-03-21T04:22:25-0500	r3.8xlarge	Linux/UNIX	ap-northeast-1a
SPOTINSTANCEPRICE	0.550800	2015-03-21T04:13:48-0500	r3.8xlarge	Linux/UNIX	ap-northeast-1a
SPOTINSTANCEPRICE	0.555700	2015-03-21T04:10:21-0500	r3.8xlarge	Linux/UNIX	ap-northeast-1a
SPOTINSTANCEPRICE	0.550800	2015-03-21T04:08:37-0500	r3.8xlarge	Linux/UNIX	ap-northeast-1a
SPOTINSTANCEPRICE	0.560700	2015-03-21T04:06:56-0500	r3.8xlarge	Linux/UNIX	ap-northeast-1a
SPOTINSTANCEPRICE	0.550800	2015-03-21T03:54:48-0500	r3.8xlarge	Linux/UNIX	ap-northeast-1a
SPOTINSTANCEPRICE	0.541700	2015-03-21T03:37:39-0500	r3.8xlarge	Linux/UNIX	ap-northeast-1a
SPOTINSTANCEPRICE	0.555500	2015-03-21T03:18:52-0500	r3.8xlarge	Linux/UNIX	ap-northeast-1a
SPOTINSTANCEPRICE	0.560300	2015-03-21T03:17:11-0500	r3.8xlarge	Linux/UNIX	ap-northeast-1a
SPOTINSTANCEPRICE	0.555500	2015-03-21T03:13:42-0500	r3.8xlarge	Linux/UNIX	ap-northeast-1a
SPOTINSTANCEPRICE	0.560300	2015-03-21T02:59:56-0500	r3.8xlarge	Linux/UNIX	ap-northeast-1a
SPOTINSTANCEPRICE	0.575900	2015-03-21T02:56:32-0500	r3.8xlarge	Linux/UNIX	ap-northeast-1a
SPOTINSTANCEPRICE	0.555500	2015-03-21T02:47:59-0500	r3.8xlarge	Linux/UNIX	ap-northeast-1a
SPOTINSTANCEPRICE	0.560300	2015-03-21T02:37:40-0500	r3.8xlarge	Linux/UNIX	ap-northeast-1a
SPOTINSTANCEPRICE	0.565300	2015-03-21T02:32:28-0500	r3.8xlarge	Linux/UNIX	ap-northeast-1a
SPOTINSTANCEPRICE	0.575900	2015-03-21T02:30:45-0500	r3.8xlarge	Linux/UNIX	ap-northeast-1a
SPOTINSTANCEPRICE	0.555500	2015-03-21T02:13:34-0500	r3.8xlarge	Linux/UNIX	ap-northeast-1a
SPOTINSTANCEPRICE	0.635600	2015-03-21T02:10:03-0500	r3.8xlarge	Linux/UNIX	ap-northeast-1a
SPOTINSTANCEPRICE	0.619900	2015-03-21T02:08:22-0500	r3.8xlarge	Linux/UNIX	ap-northeast-1a
SPOTINSTANCEPRICE	0.613700	2015-03-21T01:42:35-0500	r3.8xlarge	Linux/UNIX	ap-northeast-1a
SPOTINSTANCEPRICE	0.619900	2015-03-21T01:40:53-0500	r3.8xlarge	Linux/UNIX	ap-northeast-1a
SPOTINSTANCEPRICE	0.626400	2015-03-21T01:35:45-0500	r3.8xlarge	Linux/UNIX	ap-northeast-1a
SPOTINSTANCEPRICE	0.619900	2015-03-21T01:06:47-0500	r3.8xlarge	Linux/UNIX	ap-northeast-1a
SPOTINSTANCEPRICE	0.635600	2015-03-21T01:05:04-0500	r3.8xlarge	Linux/UNIX	ap-northeast-1a
SPOTINSTANCEPRICE	0.642500	2015-03-21T00:54:50-0500	r3.8xlarge	Linux/UNIX	ap-northeast-1a
SPOTINSTANCEPRICE	0.649600	2015-03-21T00:53:09-0500	r3.8xlarge	Linux/UNIX	ap-northeast-1a
SPOTINSTANCEPRICE	0.642500	2015-03-21T00:36:07-0500	r3.8xlarge	Linux/UNIX	ap-northeast-1a
SPOTINSTANCEPRICE	0.683900	2015-03-21T00:34:25-0500	r3.8xlarge	Linux/UNIX	ap-northeast-1a
SPOTINSTANCEPRICE	0.675800	2015-03-21T00:31:01-0500	r3.8xlarge	Linux/UNIX	ap-northeast-1a
SPOTINSTANCEPRICE	0.692300	2015-03-20T23:56:49-0500	r3.8xlarge	Linux/UNIX	ap-northeast-1a
SPOTINSTANCEPRICE	0.701100	2015-03-20T23:55:06-0500	r3.8xlarge	Linux/UNIX	ap-northeast-1a
SPOTINSTANCEPRICE	0.788700	2015-03-20T23:51:41-0500	r3.8xlarge	Linux/UNIX	ap-northeast-1a
SPOTINSTANCEPRICE	0.777400	2015-03-20T23:49:58-0500	r3.8xlarge	Linux/UNIX	ap-northeast-1a
SPOTINSTANCEPRICE	0.839500	2015-03-20T23:46:34-0500	r3.8xlarge	Linux/UNIX	ap-northeast-1a
SPOTINSTANCEPRICE	0.771800	2015-03-20T23:44:51-0500	r3.8xlarge	Linux/UNIX	ap-northeast-1a
SPOTINSTANCEPRICE	0.749600	2015-03-20T23:36:19-0500	r3.8xlarge	Linux/UNIX	ap-northeast-1a
SPOTINSTANCEPRICE	0.812900	2015-03-20T23:34:37-0500	r3.8xlarge	Linux/UNIX	ap-northeast-1a
SPOTINSTANCEPRICE	0.869000	2015-03-20T23:31:14-0500	r3.8xlarge	Linux/UNIX	ap-northeast-1a
SPOTINSTANCEPRICE	0.894900	2015-03-20T23:29:31-0500	r3.8xlarge	Linux/UNIX	ap-northeast-1a
SPOTINSTANCEPRICE	0.930000	2015-03-20T23:27:49-0500	r3.8xlarge	Linux/UNIX	ap-northeast-1a
SPOTINSTANCEPRICE	0.912000	2015-03-20T23:20:59-0500	r3.8xlarge	Linux/UNIX	ap-northeast-1a
SPOTINSTANCEPRICE	0.930000	2015-03-20T23:19:17-0500	r3.8xlarge	Linux/UNIX	ap-northeast-1a
SPOTINSTANCEPRICE	0.959200	2015-03-20T23:15:51-0500	r3.8xlarge	Linux/UNIX	ap-northeast-1a
SPOTINSTANCEPRICE	0.979600	2015-03-20T23:09:00-0500	r3.8xlarge	Linux/UNIX	ap-northeast-1a
SPOTINSTANCEPRICE	0.959200	2015-03-20T23:02:10-0500	r3.8xlarge	Linux/UNIX	ap-northeast-1a
SPOTINSTANCEPRICE	0.979600	2015-03-20T23:00:26-0500	r3.8xlarge	Linux/UNIX	ap-northeast-1a
SPOTINSTANCEPRICE	0.959200	2015-03-20T22:50:06-0500	r3.8xlarge	Linux/UNIX	ap-northeast-1a
SPOTINSTANCEPRICE	0.979600	2015-03-20T22:43:13-0500	r3.8xlarge	Linux/UNIX	ap-northeast-1a
SPOTINSTANCEPRICE	0.959200	2015-03-20T22:38:04-0500	r3.8xlarge	Linux/UNIX	ap-northeast-1a
SPOTINSTANCEPRICE	0.858300	2015-03-20T22:31:12-0500	r3.8xlarge	Linux/UNIX	ap-northeast-1a
SPOTINSTANCEPRICE	0.691400	2015-03-20T22:27:46-0500	r3.8xlarge	Linux/UNIX	ap-northeast-1a
SPOTINSTANCEPRICE	0.587300	2015-03-20T22:26:03-0500	r3.8xlarge	Linux/UNIX	ap-northeast-1a
SPOTINSTANCEPRICE	0.570500	2015-03-20T22:24:20-0500	r3.8xlarge	Linux/UNIX	ap-northeast-1a
SPOTINSTANCEPRICE	0.585600	2015-03-20T22:20:53-0500	r3.8xlarge	Linux/UNIX	ap-northeast-1a
SPOTINSTANCEPRICE	0.570500	2015-03-20T22:17:28-0500	r3.8xlarge	Linux/UNIX	ap-northeast-1a
SPOTINSTANCEPRICE	0.565300	2015-03-20T21:39:34-0500	r3.8xlarge	Linux/UNIX	ap-northeast-1a
SPOTINSTANCEPRICE	0.560300	2015-03-20T21:37:52-0500	r3.8xlarge	Linux/UNIX	ap-northeast-1a
SPOTINSTANCEPRICE	0.565300	2015-03-20T21:36:09-0500	r3.8xlarge	Linux/UNIX	ap-northeast-1a
SPOTINSTANCEPRICE	0.560300	2015-03-20T21:18:55-0500	r3.8xlarge	Linux/UNIX	ap-northeast-1a
SPOTINSTANCEPRICE	0.574800	2015-03-20T21:15:29-0500	r3.8xlarge	Linux/UNIX	ap-northeast-1a
SPOTINSTANCEPRICE	0.580100	2015-03-20T20:58:14-0500	r3.8xlarge	Linux/UNIX	ap-northeast-1a
SPOTINSTANCEPRICE	0.585600	2015-03-20T20:54:47-0500	r3.8xlarge	Linux/UNIX	ap-northeast-1a
SPOTINSTANCEPRICE	0.570500	2015-03-20T20:53:06-0500	r3.8xlarge	Linux/UNIX	ap-northeast-1a
SPOTINSTANCEPRICE	0.565300	2015-03-20T20:35:55-0500	r3.8xlarge	Linux/UNIX	ap-northeast-1a
SPOTINSTANCEPRICE	0.555500	2015-03-20T20:15:15-0500	r3.8xlarge	Linux/UNIX	ap-northeast-1a
SPOTINSTANCEPRICE	0.560300	2015-03-20T20:13:31-0500	r3.8xlarge	Linux/UNIX	ap-northeast-1a
SPOTINSTANCEPRICE	0.555500	2015-03-20T19:45:51-0500	r3.8xlarge	Linux/UNIX	ap-northeast-1a
SPOTINSTANCEPRICE	0.560300	2015-03-20T19:44:09-0500	r3.8xlarge	Linux/UNIX	ap-northeast-1a
SPOTINSTANCEPRICE	0.555500	2015-03-20T19:40:43-0500	r3.8xlarge	Linux/UNIX	ap-northeast-1a
SPOTINSTANCEPRICE	0.565300	2015-03-20T19:38:59-0500	r3.8xlarge	Linux/UNIX	ap-northeast-1a
SPOTINSTANCEPRICE	0.570500	2015-03-20T19:33:51-0500	r3.8xlarge	Linux/UNIX	ap-northeast-1a
SPOTINSTANCEPRICE	0.555700	2015-03-20T19:30:26-0500	r3.8xlarge	Linux/UNIX	ap-northeast-1a
SPOTINSTANCEPRICE	0.550800	2015-03-20T19:27:00-0500	r3.8xlarge	Linux/UNIX	ap-northeast-1a
SPOTINSTANCEPRICE	0.555700	2015-03-20T19:23:30-0500	r3.8xlarge	Linux/UNIX	ap-northeast-1a
SPOTINSTANCEPRICE	0.541700	2015-03-20T18:59:26-0500	r3.8xlarge	Linux/UNIX	ap-northeast-1a
SPOTINSTANCEPRICE	0.550800	2015-03-20T18:42:21-0500	r3.8xlarge	Linux/UNIX	ap-northeast-1a
SPOTINSTANCEPRICE	0.541700	2015-03-20T18:32:08-0500	r3.8xlarge	Linux/UNIX	ap-northeast-1a
SPOTINSTANCEPRICE	0.537400	2015-03-20T18:01:18-0500	r3.8xlarge	Linux/UNIX	ap-northeast-1a
SPOTINSTANCEPRICE	0.533200	2015-03-20T17:54:25-0500	r3.8xlarge	Linux/UNIX	ap-northeast-1a
SPOTINSTANCEPRICE	0.546500	2015-03-20T17:52:43-0500	r3.8xlarge	Linux/UNIX	ap-northeast-1a
SPOTINSTANCEPRICE	0.555500	2015-03-20T17:37:19-0500	r3.8xlarge	Linux/UNIX	ap-northeast-1a
SPOTINSTANCEPRICE	0.575900	2015-03-20T17:35:35-0500	r3.8xlarge	Linux/UNIX	ap-northeast-1a
SPOTINSTANCEPRICE	0.581500	2015-03-20T17:33:53-0500	r3.8xlarge	Linux/UNIX	ap-northeast-1a
SPOTINSTANCEPRICE	0.575900	2015-03-20T17:23:34-0500	r3.8xlarge	Linux/UNIX	ap-northeast-1a
SPOTINSTANCEPRICE	0.570500	2015-03-20T17:21:51-0500	r3.8xlarge	Linux/UNIX	ap-northeast-1a
SPOTINSTANCEPRICE	0.555500	2015-03-20T16:08:08-0500	r3.8xlarge	Linux/UNIX	ap-northeast-1a
SPOTINSTANCEPRICE	0.550900	2015-03-20T16:06:24-0500	r3.8xlarge	Linux/UNIX	ap-northeast-1a
SPOTINSTANCEPRICE	0.574800	2015-03-20T16:04:41-0500	r3.8xlarge	Linux/UNIX	ap-northeast-1a
SPOTINSTANCEPRICE	0.580100	2015-03-20T16:02:58-0500	r3.8xlarge	Linux/UNIX	ap-northeast-1a
SPOTINSTANCEPRICE	0.585600	2015-03-20T15:59:30-0500	r3.8xlarge	Linux/UNIX	ap-northeast-1a
SPOTINSTANCEPRICE	0.570500	2015-03-20T15:56:05-0500	r3.8xlarge	Linux/UNIX	ap-northeast-1a
SPOTINSTANCEPRICE	0.565300	2015-03-20T15:54:21-0500	r3.8xlarge	Linux/UNIX	ap-northeast-1a
SPOTINSTANCEPRICE	0.570500	2015-03-20T15:49:14-0500	r3.8xlarge	Linux/UNIX	ap-northeast-1a
SPOTINSTANCEPRICE	0.550900	2015-03-20T15:45:48-0500	r3.8xlarge	Linux/UNIX	ap-northeast-1a
SPOTINSTANCEPRICE	0.555500	2015-03-20T15:44:04-0500	r3.8xlarge	Linux/UNIX	ap-northeast-1a
SPOTINSTANCEPRICE	0.550900	2015-03-20T15:42:22-0500	r3.8xlarge	Linux/UNIX	ap-northeast-1a
SPOTINSTANCEPRICE	0.546500	2015-03-20T15:06:20-0500	r3.8xlarge	Linux/UNIX	ap-northeast-1a
SPOTINSTANCEPRICE	0.550900	2015-03-20T15:02:53-0500	r3.8xlarge	Linux/UNIX	ap-northeast-1a
SPOTINSTANCEPRICE	0.546500	2015-03-20T14:45:37-0500	r3.8xlarge	Linux/UNIX	ap-northeast-1a
SPOTINSTANCEPRICE	0.555500	2015-03-20T14:42:10-0500	r3.8xlarge	Linux/UNIX	ap-northeast-1a
SPOTINSTANCEPRICE	0.541700	2015-03-20T14:40:27-0500	r3.8xlarge	Linux/UNIX	ap-northeast-1a
SPOTINSTANCEPRICE	0.525300	2015-03-20T14:12:57-0500	r3.8xlarge	Linux/UNIX	ap-northeast-1a
SPOTINSTANCEPRICE	0.546500	2015-03-20T14:00:53-0500	r3.8xlarge	Linux/UNIX	ap-northeast-1a
SPOTINSTANCEPRICE	0.564700	2015-03-20T13:57:27-0500	r3.8xlarge	Linux/UNIX	ap-northeast-1a
SPOTINSTANCEPRICE	0.569600	2015-03-20T13:55:43-0500	r3.8xlarge	Linux/UNIX	ap-northeast-1a
SPOTINSTANCEPRICE	0.564700	2015-03-20T13:38:28-0500	r3.8xlarge	Linux/UNIX	ap-northeast-1a
SPOTINSTANCEPRICE	0.559900	2015-03-20T13:33:18-0500	r3.8xlarge	Linux/UNIX	ap-northeast-1a
SPOTINSTANCEPRICE	0.613700	2015-03-20T13:29:50-0500	r3.8xlarge	Linux/UNIX	ap-northeast-1a
SPOTINSTANCEPRICE	0.616900	2015-03-20T13:26:23-0500	r3.8xlarge	Linux/UNIX	ap-northeast-1a
SPOTINSTANCEPRICE	0.610600	2015-03-20T13:21:14-0500	r3.8xlarge	Linux/UNIX	ap-northeast-1a
SPOTINSTANCEPRICE	0.604500	2015-03-20T13:12:39-0500	r3.8xlarge	Linux/UNIX	ap-northeast-1a
SPOTINSTANCEPRICE	0.587700	2015-03-20T12:55:27-0500	r3.8xlarge	Linux/UNIX	ap-northeast-1a
SPOTINSTANCEPRICE	0.598700	2015-03-20T12:50:17-0500	r3.8xlarge	Linux/UNIX	ap-northeast-1a
SPOTINSTANCEPRICE	0.593100	2015-03-20T12:43:18-0500	r3.8xlarge	Linux/UNIX	ap-northeast-1a
SPOTINSTANCEPRICE	0.604500	2015-03-20T12:41:35-0500	r3.8xlarge	Linux/UNIX	ap-northeast-1a
SPOTINSTANCEPRICE	0.610600	2015-03-20T12:38:10-0500	r3.8xlarge	Linux/UNIX	ap-northeast-1a
SPOTINSTANCEPRICE	0.598700	2015-03-20T12:36:25-0500	r3.8xlarge	Linux/UNIX	ap-northeast-1a
SPOTINSTANCEPRICE	0.593100	2015-03-20T12:31:15-0500	r3.8xlarge	Linux/UNIX	ap-northeast-1a
SPOTINSTANCEPRICE	0.587700	2015-03-20T12:26:02-0500	r3.8xlarge	Linux/UNIX	ap-northeast-1a
SPOTINSTANCEPRICE	0.546500	2015-03-20T12:22:35-0500	r3.8xlarge	Linux/UNIX	ap-northeast-1a
SPOTINSTANCEPRICE	0.533200	2015-03-20T12:20:52-0500	r3.8xlarge	Linux/UNIX	ap-northeast-1a
SPOTINSTANCEPRICE	0.525300	2015-03-20T12:12:14-0500	r3.8xlarge	Linux/UNIX	ap-northeast-1a
SPOTINSTANCEPRICE	0.529200	2015-03-20T12:10:29-0500	r3.8xlarge	Linux/UNIX	ap-northeast-1a
SPOTINSTANCEPRICE	0.525300	2015-03-20T11:56:45-0500	r3.8xlarge	Linux/UNIX	ap-northeast-1a
SPOTINSTANCEPRICE	0.529200	2015-03-20T11:44:42-0500	r3.8xlarge	Linux/UNIX	ap-northeast-1a
SPOTINSTANCEPRICE	0.533200	2015-03-20T11:29:11-0500	r3.8xlarge	Linux/UNIX	ap-northeast-1a
SPOTINSTANCEPRICE	0.541700	2015-03-20T10:44:16-0500	r3.8xlarge	Linux/UNIX	ap-northeast-1a
SPOTINSTANCEPRICE	0.555700	2015-03-20T10:40:50-0500	r3.8xlarge	Linux/UNIX	ap-northeast-1a
SPOTINSTANCEPRICE	0.541700	2015-03-20T09:45:26-0500	r3.8xlarge	Linux/UNIX	ap-northeast-1a
SPOTINSTANCEPRICE	0.555700	2015-03-20T09:28:07-0500	r3.8xlarge	Linux/UNIX	ap-northeast-1a
SPOTINSTANCEPRICE	0.546200	2015-03-20T09:21:13-0500	r3.8xlarge	Linux/UNIX	ap-northeast-1a
SPOTINSTANCEPRICE	0.555700	2015-03-20T09:16:04-0500	r3.8xlarge	Linux/UNIX	ap-northeast-1a
SPOTINSTANCEPRICE	0.541700	2015-03-20T09:14:18-0500	r3.8xlarge	Linux/UNIX	ap-northeast-1a
SPOTINSTANCEPRICE	0.546200	2015-03-20T09:10:50-0500	r3.8xlarge	Linux/UNIX	ap-northeast-1a
SPOTINSTANCEPRICE	0.541700	2015-03-20T08:46:40-0500	r3.8xlarge	Linux/UNIX	ap-northeast-1a
SPOTINSTANCEPRICE	0.546200	2015-03-20T08:43:10-0500	r3.8xlarge	Linux/UNIX	ap-northeast-1a
SPOTINSTANCEPRICE	0.550800	2015-03-20T08:38:00-0500	r3.8xlarge	Linux/UNIX	ap-northeast-1a
SPOTINSTANCEPRICE	0.555700	2015-03-20T08:34:32-0500	r3.8xlarge	Linux/UNIX	ap-northeast-1a
SPOTINSTANCEPRICE	0.550800	2015-03-20T08:29:21-0500	r3.8xlarge	Linux/UNIX	ap-northeast-1a
SPOTINSTANCEPRICE	0.560700	2015-03-20T08:25:56-0500	r3.8xlarge	Linux/UNIX	ap-northeast-1a
SPOTINSTANCEPRICE	0.541700	2015-03-20T06:52:33-0500	r3.8xlarge	Linux/UNIX	ap-northeast-1a
SPOTINSTANCEPRICE	0.546200	2015-03-20T06:50:49-0500	r3.8xlarge	Linux/UNIX	ap-northeast-1a
SPOTINSTANCEPRICE	0.541700	2015-03-20T06:45:38-0500	r3.8xlarge	Linux/UNIX	ap-northeast-1a
SPOTINSTANCEPRICE	0.546200	2015-03-20T06:43:53-0500	r3.8xlarge	Linux/UNIX	ap-northeast-1a
SPOTINSTANCEPRICE	0.541700	2015-03-20T06:05:40-0500	r3.8xlarge	Linux/UNIX	ap-northeast-1a
SPOTINSTANCEPRICE	0.577000	2015-03-20T05:55:10-0500	r3.8xlarge	Linux/UNIX	ap-northeast-1a
SPOTINSTANCEPRICE	0.582900	2015-03-20T05:53:25-0500	r3.8xlarge	Linux/UNIX	ap-northeast-1a
SPOTINSTANCEPRICE	0.577000	2015-03-20T05:34:07-0500	r3.8xlarge	Linux/UNIX	ap-northeast-1a
SPOTINSTANCEPRICE	0.582900	2015-03-20T05:04:15-0500	r3.8xlarge	Linux/UNIX	ap-northeast-1a
SPOTINSTANCEPRICE	0.602200	2015-03-20T05:02:29-0500	r3.8xlarge	Linux/UNIX	ap-northeast-1a
SPOTINSTANCEPRICE	0.595500	2015-03-20T05:00:43-0500	r3.8xlarge	Linux/UNIX	ap-northeast-1a
SPOTINSTANCEPRICE	0.589100	2015-03-20T04:58:56-0500	r3.8xlarge	Linux/UNIX	ap-northeast-1a
SPOTINSTANCEPRICE	0.582900	2015-03-20T04:57:13-0500	r3.8xlarge	Linux/UNIX	ap-northeast-1a
SPOTINSTANCEPRICE	0.589100	2015-03-20T04:53:40-0500	r3.8xlarge	Linux/UNIX	ap-northeast-1a
[truncated: 172,085 more rows]
