# Supplementary material for: Low cost, high performance processing of single particle cryo-electron microscopy data in the cloud
Source: eLife journal article supplement (doi:10.7554/elife.06664), 2015-05-08
Supplement: supp [file elife-06664-supp-v1.zip › elife_poa_e06664_Figure_4_source_data_1.xlsx]

## Sheet: Sheet1
Figure 2 - Source data 1
Cluster configuration: r3.8xlarge instances at $0.35/hr										Amdahl's parallel portion (f)
Number of hyperthreads (vCPUs)	2	32	64	128	256	320	512	960		1
Number of CPUs	1	16	32	64	128	160	256	480		0.9975
Number of instances	1	1	2	4	8	10	16	30		0.995
3D classification time (min.)	2715	158	84	46	30	27	23	25		0.99
3D classification Speedup/Cost	0.0631413	18.644	32.981	54.9892	64.6429	63.8448	54.9892	24.8229
3D classification Cost	15.8375	0.921667	0.98	1.07333	1.4	1.575	2.14667	4.375		Info
3D classification Speedup	1	17.1835	32.3214	59.0217	90.5	100.556	118.043	108.6		3D classificaton: 2 rounds of classification; 240 x 240 pixels; 4 classes; 62,022 particles
3D refinement time (min.)	1740	99	54	33	28	-	25	34		3D refinement: 6 rounds of refinement; 240 x 240 pixels; Filt = 50A initially; 32,533 particles
3D refinement Speedup/Cost	0.0985222	30.4342	51.1464	68.477	47.5583	-	29.8286	8.60109
3D refinement Cost	10.15	0.5775	0.63	0.77	1.30667	-	2.33333	5.95
3D refinment Speedup	1	17.5758	32.2222	52.7273	62.1429	-	69.6	51.1765
Amdahl's law: f = 1.0000	1	16	32	64	128	160	256	480
Amdahl's law: f = 0.9975	1	15.4217	29.6984	55.2916	97.1537	114.49	156.336	218.43
Amdahl's law: f = 0.9950	1	14.8837	27.7056	48.6692	78.2875	89.1365	112.527	141.384
Amdahl's law: f = 0.9900	1	13.913	24.4275	39.2638	56.3877	61.7761	72.1127	82.9016
						Observations
Bootup times (Number of instances)**	Num. CPUs	Avg.	Std. Dev	Attempt 1	Attempt 2	Attempt 3	Attempt 4	Attempt 5
1	16	1.884	0.149097	2.08	1.75	1.95	1.72	1.92
2	32	9.992	1.31121	10.02	8.01	11.7	10.1	10.13
4	64	7.072	1.97321	6.37	10.42	7.2	5.62	5.75
8	128	9.838	0.621265	10.25	9.82	10.23	8.77	10.12
16	256	9.188	1.19026	9.44	10.8	7.7	9.6	8.4
30	480	10.268	1.1859	9.68	9.17	10.02	12.27	10.2
** Bid = 0.30; Minimum price = 0.25
