# Supplementary material for: Low cost, high performance processing of single particle cryo-electron microscopy data in the cloud
Source: eLife journal article supplement (doi:10.7554/elife.06664), 2015-05-08
Supplement: supp [file elife-06664-supp-v1.zip › elife_poa_e06664_Supplementary_File_3.xlsx]

## Sheet: Sheet1
Supplementary File 3
Processing steps and associated time points to calculate a 4.6 Å 80S yeast ribosome structure
3D classification		Time(Hr:fractions of hr)	Time stamps (Hr:min)
	Start	17.667	17:40:00
	13 iterations, 4 classes, T=4	21.2	21:12:00
	12 iterations; 4 classes local searches	23.467	23:28:00
	Total elapsed time	5.8	05:48:00
3D refinement		Time(Hr:fractions of hr)	Time stamps (Hr:min)
	Start	1.1	01:06:00
	Finish	5.618	05:37:00
	Total elapsed time	4.518	-
STARcluster information
	Instance type	r3.8xlarge
	Hyperthreads per instance	32
	CPU cores per instance	16
	Number of instances	8
	Cost per spot instance - hour	0.35
	Cost per cluster - hour	2.8
Cost information
	Refinement CPU-hours	578.304
	Refinement CPU-months	0.8032
	3D Classification cost	16.24
	3D refinement cost	12.6504
	Total CPU-hours	1320.7
	Total cost	28.8904
Estimating costs for previously determined structures
Sample	Original movie processing time (CPU-hrs)	New movie processing time (CPU-hrs)	Total CPU-hours	CPU-months	Cluster size (hyperthreads)	Cluster size (CPUs)	Cost per hour	Estimated cost
γ-secretase	3720	940	4660	6.47222	256	128	2.8	101.938
β-galactosidase	690	470	1160	1.61111	256	128	2.8	25.375
Mitochondrial ribosome	8030	1300	9330	12.9583	256	128	2.8	204.094
