# Supplementary figures and images for: Low cost, high performance processing of single particle cryo-electron microscopy data in the cloud
Source: eLife journal article supplement (doi:10.7554/elife.06664), 2015-05-08

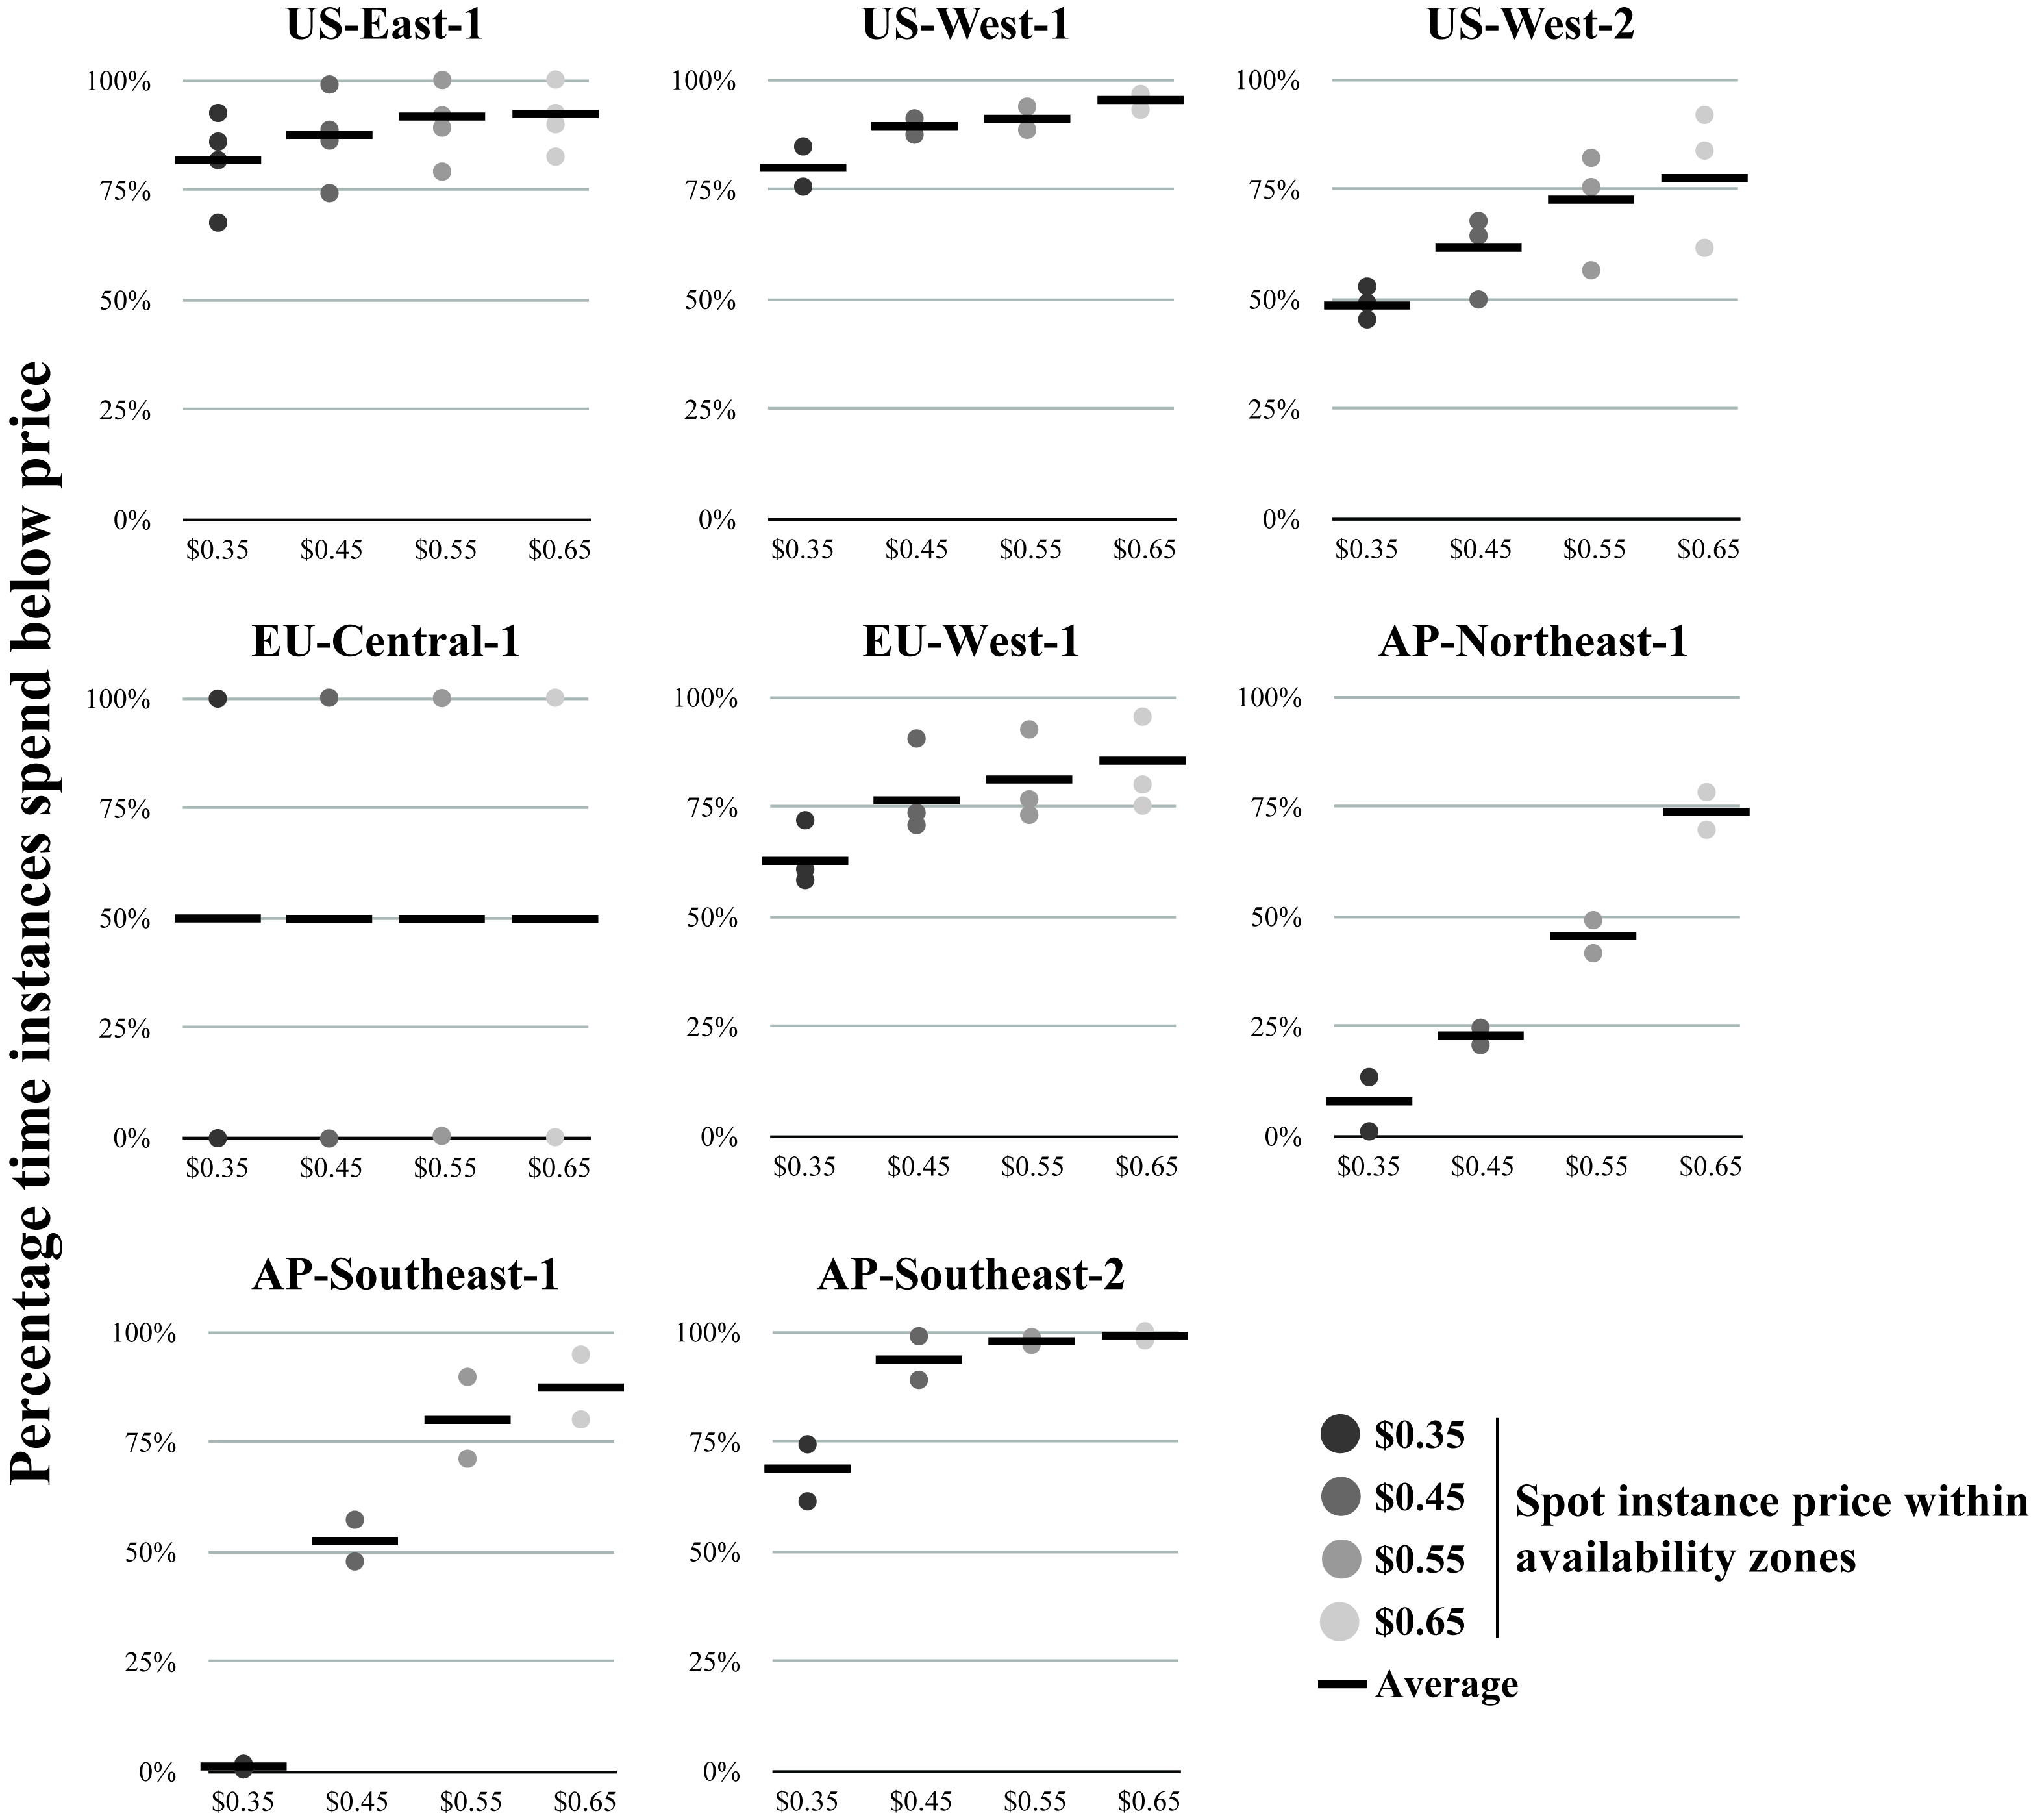

Supplement: supp [file elife-06664-supp-v1.zip › elife_poa_e06664_Figure_2_figure_supplement_1.tif]
